# Supplementary material
Source: PubMed Central journal article supplement (PMC10988354)
Supplement: jama-e243056-s002.pdf [file jama-e243056-s002.pdf]

## Supplemental Online Content

Leon-Ferre RA, Jonas SF, Salgado R, et al. Tumor-infiltrating lymphocytes in triple-negative breast cancer. *JAMA*. doi:10.1001/jama.2024.3056

### 1. Study Population

**eTable 1-A.** Details on Patients Included/Excluded From Each Cohort

**eTable 1-B.** Criteria Used by Each Cohort To Define ER, PR, and HER2–Negative Status

**eFigure 1-A.** Inclusion Period According to Each Cohort

**eFigure 1-B.** Tumor Size Distribution per Cohort, Ordered According to First Year of Inclusion

**eFigure 1-C.** T1 Substage Distribution per Cohort, Ordered According to First Year of Inclusion

**eFigure 1-D.** Nodal Stage Distribution per Cohort, Ordered According to First Year of Inclusion

**eFigure 1-E.** Overall Stage Distribution per Cohort, According to First Year of Inclusion

**eTable 1-C.** Characteristics of the Population Included in the Study

### 2. TIL Distribution

**eFigure 2-A.** Distribution of the Stromal TILs in the Overall Study

**eFigure 2-B.** Distribution of the Stromal TILs per Cohort

**eTable 2-A.** Summary of TILs Values by Cohort

**eTable 2-B.** Correlation Matrix Between Clinicopathological Characteristics and TILs

**eFigure 2-B.** Graphical Display of the Correlation Matrix Between Clinicopathological Characteristics and TILs

**eFigure 2-C.** Scatterplot of Age vs TILs

### 3. Statistical Methods

**eTable 3-A.** Breast Cancer Clinical Trial End Points per STEEP 2.0

**eTable 3-B.** Number and Percentage of Composite Events, by Study and in Total

**eTable 3-C.** Number and Percentage of First Events, by Study and in Total

**eTable 3-D.** Details on Missing Values

**eFigure 3-A.** Patterns of Missing Values

**eTable 3-E.** Percentages and Contribution of Missing Values in Each Study on the 5 Adjustment Variables

**eTable 3-F.** Comparison of the Characteristics of the Population With and Without Missing Values **eFigure**

**3-B.** Survival Among Patients With Missing Data vs Not

**eFigure 3-C.** Imputed Missing Values in the 20 Imputed Datasets: First Number Corresponds to Initial Dataset

### 4. Cox Models

**eTable 4-A.** Cox Models of Clinicopathological Variables and TILs vs Overall Survival

**eTable 4-B.** Cox Models of Clinicopathological Variables and TILs vs RFS

**eTable 4-C.** Cox Models of Clinicopathological Variables and TILs vs DDFS

**eTable 4-D.** Cox Models of Clinicopathological Variables and TILs vs DRFS

**eTable 4-E.** Cox Models Including Clinicopathological Variables and TILs on IBCFS

**eTable 4-F.** Cox Models of Clinicopathological Variables and TILs vs IDFS

### 5. Detailed Clinical Outcomes According to Various TIL Thresholds and According to Stage

**eTable 5-A.** Clinical Outcomes According to TIL Thresholds in the Overall Study Population, According to Age and Stage

**eFigure 5-A.** Overall Survival According to TILs <30% vs ≥30%

**eFigure 5-B.** RFS According to TILs <30% vs ≥30%

**eFigure 5-C.** DDFS According to TILs <30% vs ≥30%

**eFigure 5-D.** DRFS According to TILs <30% vs ≥30%

**eFigure 5-E.** IBCFS According to TILs <30% vs ≥30%

**eFigure 5-F.** IDFS According to TILs <30% vs ≥30%

**eFigure 5-G.** Overall Survival According to TILs <75% vs ≥75%

**eFigure 5-H.** RFS According to TILs <75% vs ≥75%

**eFigure 5-I.** DDFS According to TILs <75% vs ≥75%

**eFigure 5-J.** DRFS According to TILs <75% vs ≥75%

**eFigure 5-K.** IBCFS According to TILs <75% vs ≥75%

**eFigure 5-L.** IDFS According to TILs <75% vs ≥75%

**eFigure 5-M.** Overall Survival According to Nodal Status and TILs <30 vs ≥30%

**eFigure 5-N.** RFS According to Nodal Status and TILs <30 vs ≥30%

© 2024 American Medical Association. All rights reserved.

**eFigure 5-O.** DDFS According to Nodal Status and TILs <30 vs ≥30%

**eFigure 5-P.** DRFS According to Nodal Status and TILs <30 vs ≥30%

**eFigure 5-Q.** IBCFS According to Nodal Status and TILs <30 vs ≥30%

**eFigure 5-R.** IDFS According to Nodal Status and TILs <30 vs ≥30%

**eFigure 5-S.** Overall Survival According to T1 Substage Among Patients With Stage I TNBC (Regardless of TILs)

**eFigure 5-T.** RFS According to T1 Substage Among Patients With Stage I TNBC (Regardless of TILs)

**eFigure 5-U.** DDFS According to T1 Substage Among Patients With Stage I TNBC (Regardless of TILs)

**eFigure 5-V.** DRFS According to T1 Substage Among Patients With Stage I TNBC (Regardless of TILs)

**eFigure 5-W.** IBCFS According to T1 Substage Among Patients With Stage I TNBC (Regardless of TILs)

**eFigure 5-X.** IDFS According to T1 Substage Among Patients With Stage I TNBC (Regardless of TILs)

**6. Adjusted Forest Plots According to Each End Point**

**7. Additional Survival Rates**

**eTable 7-A.** Survival Rates at 3 Years for Stage I TNBC

**eTable 7-B.** Survival Rates at 3, 5, and 10 Years According to Age and TIL Levels

**8. Competing Risk Analysis**

**eTable 8-A.** Competing Events

**eTable 8-B.** Competing Events According to TILs Level (30% Threshold)

**eFigure 8-A.** Influence of TILs <30% vs ≥30% on Distant Relapse, Death, or Second Cancers

**eTable 8-C.** Competing Events According to TILs Level (50% Threshold)

**eFigure 8-B.** Influence of TILs <50% vs ≥50% on Distant Relapse, Death, or Second Cancers

**eTable 8-D.** Competing Events According to TILs Level (30% Threshold) in the pN0 Population

**eFigure 8-C.** Influence of TILs <30% vs ≥30% on Distant Relapse, Death, or Second Cancers in Node-Negative TNBC

**eTable 8-E.** Competing Events According to TILs Level (50% Threshold) in the pN0 Population

**eFigure 8-D.** Influence of TILs <30% vs ≥30% on Distant Relapse, Death or Second Cancers in Node-Negative TNBC

**9. Time-Dependent ROC Curves and AUC**

**eTable 9-A.** AUC (IPCW) at 5 Years and Confidence Interval (CI)

**eTable 9-B.** AUC (IPCW) at 10 Years and Confidence Interval (CI)

**10. Cross-Validation Study**

**eFigure 10-A.** Overall Survival Calibration Plots

**eFigure 10-B.** Recurrence-Free Survival Calibration Plots

**eFigure 10-C.** Distant-Disease Free Survival Calibration Plots

**eFigure 10-D.** Invasive Disease-Free Survival Calibration Plots

**eFigure 10-E.** Invasive Breast Cancer-Free Survival Calibration Plots

**11. Investigation of the Violation of the Proportional Effects Assumption in the Cox Model**

**eFigure 11-A.** Schoenfeld Residuals of the Univariate Models for Each End Point

**eFigure 11-B.** Schoenfeld Residuals of the Multivariable Models for Each End Point

**eTable 11.** Multivariate Cox Model With End Point: Overall Survival Stratified on Time

**12. Investigation of the Effect of Inclusion Year on Survival End Points According to TILs**

**eTable 12.** Sensitivity Analysis of Survival Outcomes According to TIL Levels Pre- and Post- 1998

**eFigure 12-A.** Survival Outcomes in Patients With TNBC and TILs <30% Who Underwent Locoregional Therapy Before vs After 1998

**eFigure 12-B.** Survival Outcomes in Patients With TNBC and TILs ≥50% Who Underwent Locoregional Therapy Before vs After 1998

**eReferences.**

This supplemental material has been provided by the authors to give readers additional information about their work.

# 1. Study population

We received data on 2211 patients from 13 institutions:

- 22 patients without TILs value were excluded,
- 41 patients with ER levels above 1% (when the information was available) were excluded,
- 18 patients with PR levels above 1% (when the information was available) were excluded,
- 133 patients treated with neoadjuvant chemotherapy were excluded,
- 21 patients without follow-up information were excluded,
- 1 patient with two cancers at diagnostic was excluded,
- 1 patient with preinvasive cancer was excluded,
- 8 patients without surgery were excluded.

After exclusions, a total of 1966 patients were included in the analysis.

| Study                           | Initial number | Missing TILs | ER >1% | PR >1% | Chemo-treated | Missing follow-up | Two cancers at diagnosis | No surgery | Preinvasive cancer | Final number |
|---------------------------------|----------------|--------------|--------|--------|---------------|-------------------|--------------------------|------------|--------------------|--------------|
| Genova, Italy                   | 16             | 0            | 0      | 0      | 0             | 0                 | 0                        | 0          | 0                  | 16           |
| Padova, Italy                   | 40             | 0            | 1      | 1      | 0             | 0                 | 0                        | 0          | 0                  | 38           |
| Gothenburg, Sweden              | 65             | 5            | 3      | 0      | 0             | 0                 | 0                        | 4          | 0                  | 53           |
| Lyon, France*                   | 59             | 0            | NA     | NA     | 0             | 0                 | 1                        | 0          | 0                  | 58           |
| Gustave Roussy, Paris, France*  | 98             | 3            | NA     | NA     | 0             | 0                 | 0                        | 0          | 0                  | 95           |
| Tokyo, Japan                    | 125            | 0            | 13     | 3      | 0             | 0                 | 0                        | 0          | 0                  | 109          |
| UUCM Seoul, Korea*              | 117            | 0            | NA     | NA     | 1             | 0                 | 0                        | 0          | 0                  | 116          |
| Curie, Paris, France            | 150            | 2            | 0      | 0      | 0             | 0                 | 0                        | 0          | 0                  | 148          |
| Milan, Italy                    | 190            | 11           | 0      | 0      | 0             | 20                | 0                        | 0          | 0                  | 159          |
| Mayo, MN, USA                   | 182            | 1            | 0      | 0      | 0             | 0                 | 0                        | 0          | 0                  | 181          |
| Erasmus, Rotterdam, Netherlands | 243            | 0            | 0      | 0      | 0             | 1                 | 0                        | 0          | 1                  | 241          |
| UBC, Vancouver, Canada          | 445            | 0            | 0      | 0      | 132           | 0                 | 0                        | 4          | 0                  | 309          |
| NKI, Amsterdam, Netherlands     | 481            | 0            | 24     | 14     | 0             | 0                 | 0                        | 0          | 0                  | 443          |
| Total                           | 2211           | 22           | 41     | 18     | 133           | 21                | 1                        | 8          | 1                  | 1966         |

\* ER/PR threshold used in this cohort was 10%, specific % value was not available

Information on the level of TIL and on the time elapsed between surgery (or the date of diagnosis) and the events considered (see details in section 3.1) or the date of the last follow-up were a pre-requisite to include the patient in the analysis.

In addition, all 13 centers provided data on requested covariates: tumor size, number of positive lymph nodes, age, histological grade, radiotherapy, type of surgery. Sporadic missing data were possible on these covariates (see details in the table S.2).

Additional covariates on histologic subtypes and menopausal status were also available for most studies, these covariates being used for descriptive purposes only.

eTable 1-B. Criteria Used by Each Cohort To Define ER, PR, and HER2–Negative Status

| Study                          | ER neg                              | PR neg                                                    | HER2 neg                               |
|--------------------------------|-------------------------------------|-----------------------------------------------------------|----------------------------------------|
| Mayo (USA)                     | 1% threshold                        | 1% threshold                                              | IHC 0, 1+, or 2+ w/ FISH neg           |
| NKI (Amsterdam)                | 1% threshold (24 patients excluded) | 1% threshold (15 patients excluded including 1 with ER>0) | IHC 0, 1+, or 2+ w/ SISH neg/equivocal |
| UUCM (Ulsan)                   | 10% threshold                       | 10% threshold                                             | IHC 0, 1+, or 2+ w/ FISH neg           |
| IGR (Paris)                    | 10% threshold                       | No IHC data                                               | IHC 0                                  |
| UBC (Vancouver)                | 1% threshold                        | 1% threshold                                              | IHC 0, 1+, or 2+ w/ FISH neg           |
| IEO (Milano)                   | 1% threshold                        | 1% threshold                                              | IHC 0, 1+, or 2+ w/ FISH neg           |
| Curie (Paris)                  | 1% threshold                        | 1% threshold                                              | IHC 0, 1+, or 2+ w/ FISH neg           |
| Centre Leon Berard (Lyon)      | 10% threshold                       | 10% threshold                                             | IHC 0, 1+, or 2+ w/ FISH neg           |
| IOV (Padova)                   | 1% threshold (1 patient excluded)   | 1% threshold (1 patient excluded)                         | IHC 0, 1+, or 2+ ISH not amplified     |
| UniGe (Genova)                 | 1% threshold                        | 1% threshold                                              | IHC 0, 1+, or 2+ w/ FISH neg           |
| Sahlgrenska UH (Göteborg)      | 1% threshold (3 patients excluded)  | 1% threshold                                              | IHC 0, 1+, or 2+ w/ FISH neg           |
| National Cancer Center (Tokyo) | 1% threshold (13 patients excluded) | 1% threshold (10 patients excluded including 7 with ER>0) | IHC 0, 1+, or 2+ w/ FISH neg           |
| Erasmus University (Rotterdam) | 1% threshold                        | 1% threshold                                              | IHC 0, 1+, or 2+ ISH not amplified     |

The following cohorts (which included patients treated prior to routine clinical testing of HER2 status) Evaluated HER2 status directly from tumor tissue, using the criteria noted in table S1A: Mayo Clinic (USA), UBC (Vancouver), NKI (Amsterdam), IEO (Milano), IGR (Paris), Sahlgrenska UH (Göteborg), Erasmus (Rotterdam).

The following cohorts abstracted HER2 status from the medical record without tissue retesting: IOV (Padova), National Cancer Center (Tokyo). Please note that period of enrollment for these cohorts was more recent, after HER2 testing became standard in the clinic.

**eFigure 1-A. Inclusion Period According to Each Cohort**

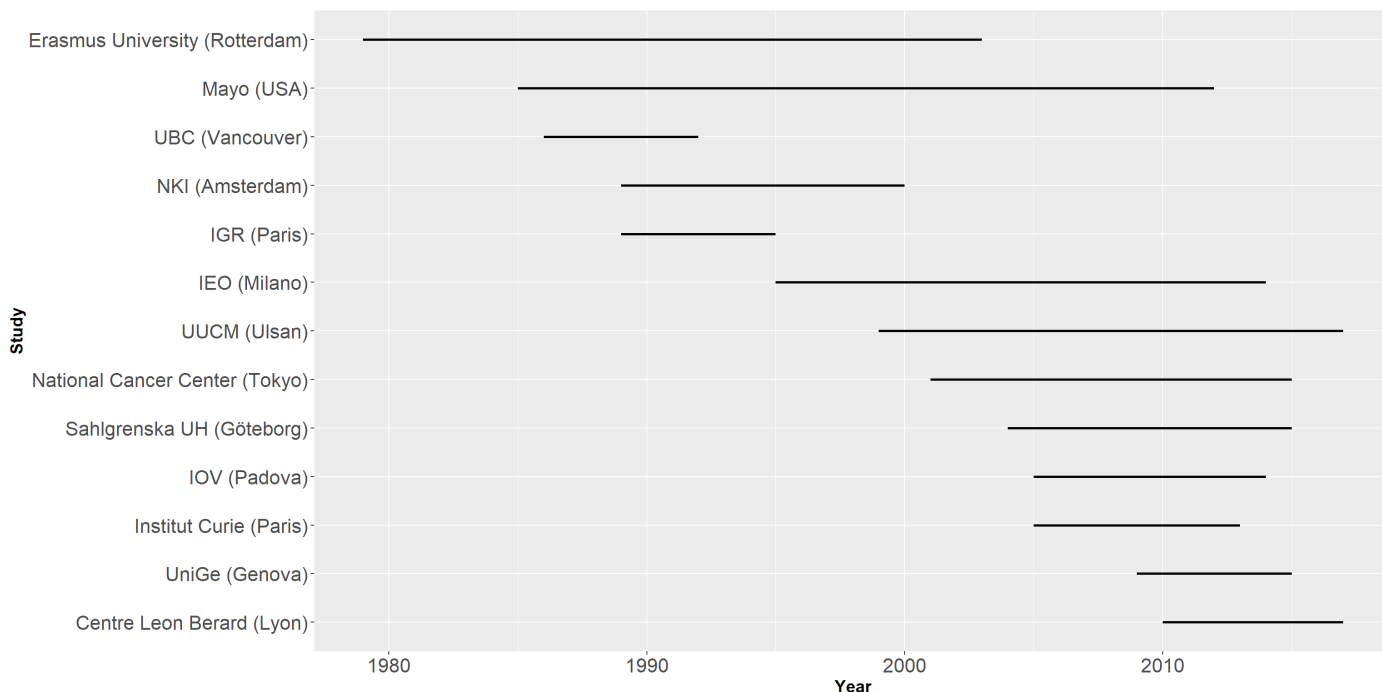

**eFigure 1-B. Tumor Size Distribution per Cohort, Ordered According to First Year of Inclusion**

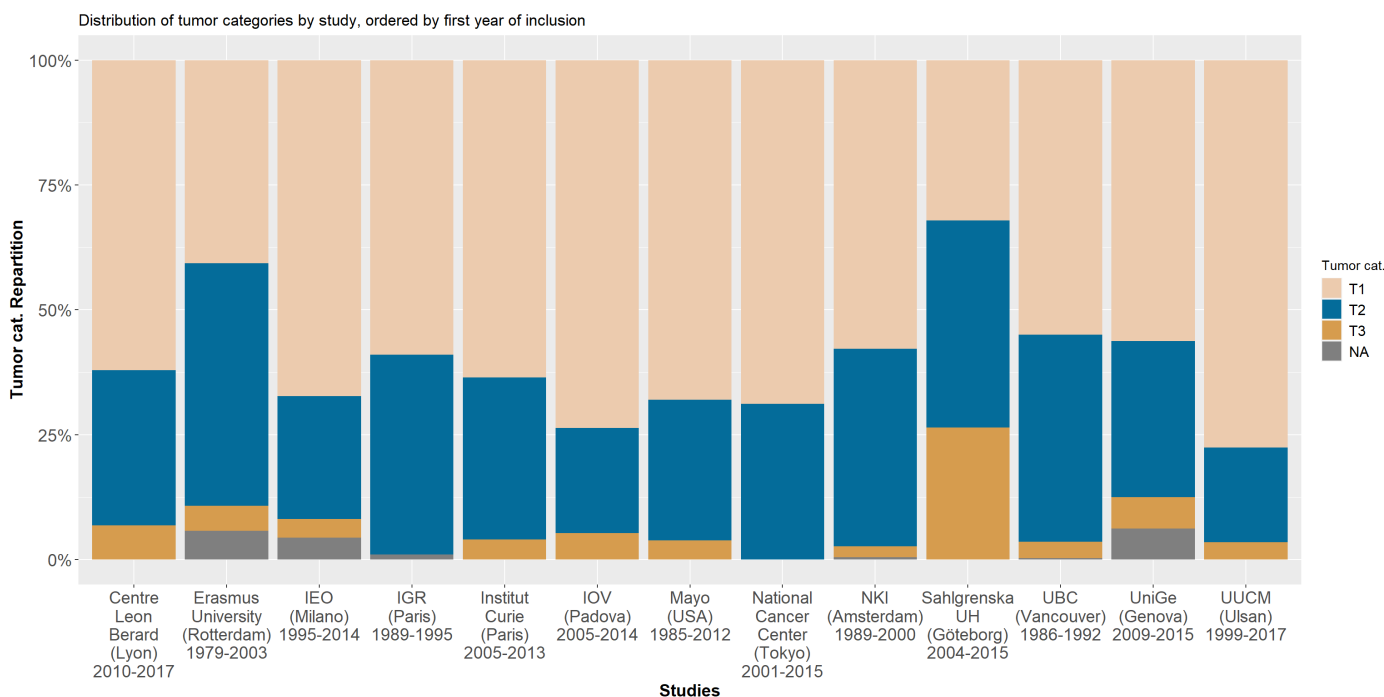

**eFigure 1-C. T1 Substage Distribution per Cohort, Ordered According to First Year of Inclusion**

Distribution of tumor categories across the studies classified by 1st year of inclusion

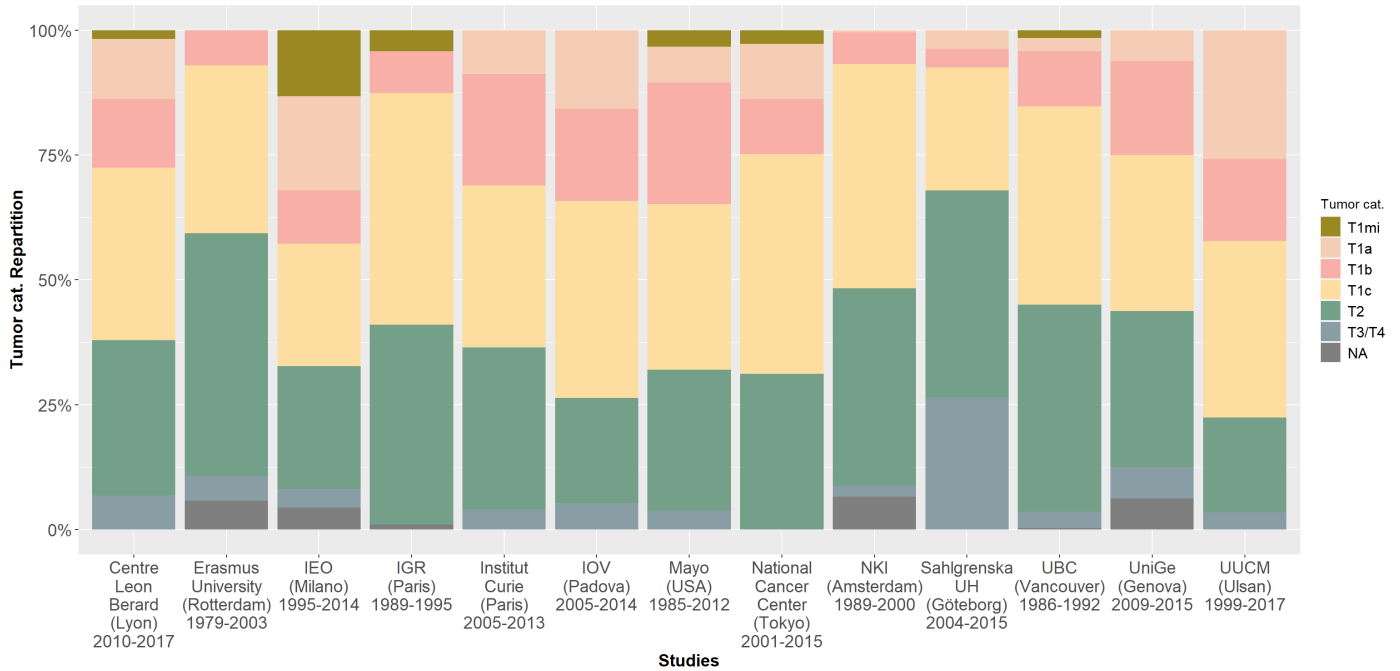

**eFigure 1-D. Nodal Stage Distribution per Cohort, Ordered According to First Year of Inclusion**

Distribution of lymph node status by study, ordered by first year of inclusion

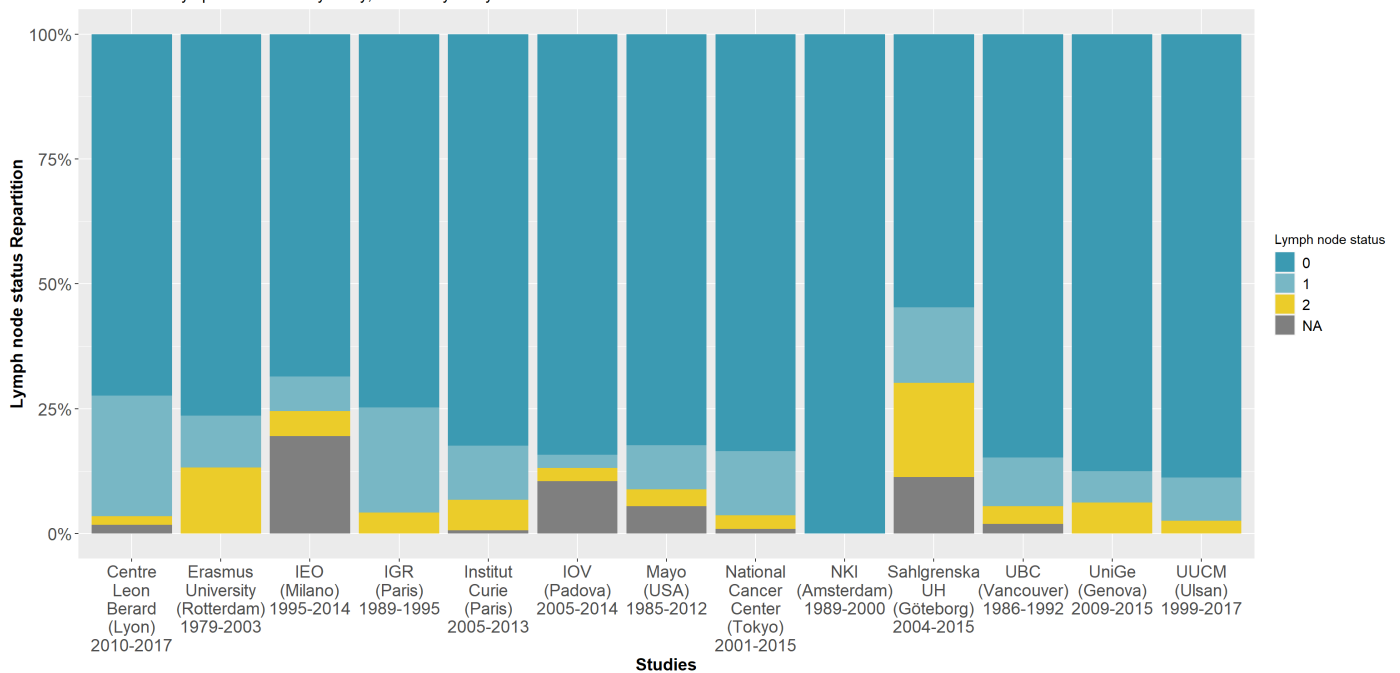

### eFigure 1-E. Overall Stage Distribution per Cohort, According to First Year of Inclusion

Distribution of prognostic stages by study, ordered by first year of inclusion

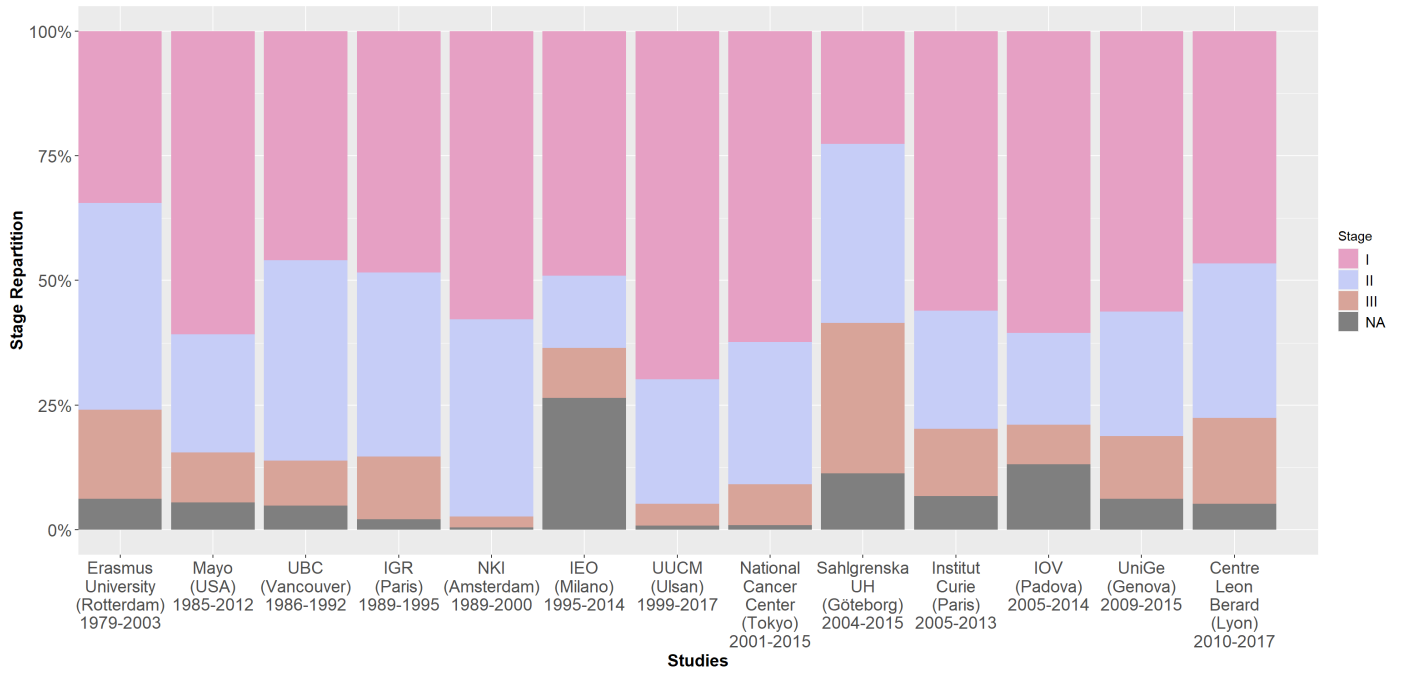

eTable 1-C. Characteristics of the Population Included in the Study

|                                       | <i>UBC<br/>(Vancouver)</i> | <i>Curie<br/>(Paris)</i> | <i>Erasmus<br/>(Rotterdam)</i> | <i>UniGe<br/>(Genova)</i> | <i>IGR (Paris)</i> | <i>National Cancer<br/>Center (Tokyo)</i> | <i>UUCM<br/>(Ulsan)</i> | <i>Leon Berard<br/>(Lyon)</i> | <i>Mayo (USA)</i> | <i>IEO<br/>(Milano)</i> | <i>NKI<br/>(Amsterdam)</i> | <i>IOV (Padova)</i> | <i>Sahlgrenska<br/>(Göteborg)</i> | <i>Overall</i>     |
|---------------------------------------|----------------------------|--------------------------|--------------------------------|---------------------------|--------------------|-------------------------------------------|-------------------------|-------------------------------|-------------------|-------------------------|----------------------------|---------------------|-----------------------------------|--------------------|
|                                       | <i>n= 309</i>              | <i>n= 148</i>            | <i>n= 241</i>                  | <i>n= 16</i>              | <i>n= 95</i>       | <i>n= 109</i>                             | <i>n= 116</i>           | <i>n= 58</i>                  | <i>n= 181</i>     | <i>n= 159</i>           | <i>n= 443</i>              | <i>n= 38</i>        | <i>n= 53</i>                      | <i>n= 1966</i>     |
| <b>Date of surgery (or diagnosis)</b> |                            |                          |                                |                           |                    |                                           |                         |                               |                   |                         |                            |                     |                                   |                    |
| Min-Max                               | 1986 - 1992                | 2005- 2013               | 1979 - 2003                    | 2009 - 2015               | 1989-1995          | 2001 - 2015                               | 1999-2017               | 2010- 2017                    | 1985-2012         | 1995 - 2014             | 1989 - 2000                | 2005 - 2014         | 2004 - 2015                       | <b>1979 -2017</b>  |
| <b>Age</b>                            |                            |                          |                                |                           |                    |                                           |                         |                               |                   |                         |                            |                     |                                   |                    |
| Mean                                  | 57.7                       | 72.4                     | 55.4                           | 75.1                      | 50.5               | 65.1                                      | 58.6                    | 72.1                          | 62.6              | 66.0                    | 34.6                       | 68.2                | 77.7                              | <b>55.9</b>        |
| SD                                    | 12.9                       | 12.8                     | 13.6                           | 12.8                      | 10.0               | 13.3                                      | 14.3                    | 12.8                          | 14.8              | 14.2                    | 3.6                        | 13.2                | 9.7                               | <b>17.5</b>        |
| Median                                | 59.0                       | 76.0                     | 56.0                           | 80.5                      | 50.5               | 69.0                                      | 59.5                    | 75.5                          | 63.8              | 67.0                    | 35.0                       | 70.5                | 78.0                              | <b>56.0</b>        |
| Q1-Q3                                 | 49.0 - 68.0                | 62.8 - 82.0              | 45.0 - 66.0                    | 64.8 - 82.0               | 43.4 - 57.8        | 56.0 - 74.0                               | 48.0 - 70.0             | 62.8 - 81.0                   | 52.0 - 73.8       | 55.0 - 76.5             | 32.0 - 38.0                | 58.5 - 77.0         | 73.0 - 84.0                       | <b>38.9 - 71.0</b> |
| Min-Max                               | 27.0 - 89.0                | 37.0 - 94.0              | 28.0 - 88.0                    | 45.0 - 90.0               | 29.1 - 69.5        | 32.0 - 99.0                               | 24.0 - 88.0             | 28.0 - 89.0                   | 30.0 - 93.7       | 27.0 - 96.0             | 22.0 - 39.0                | 31.0 - 88.0         | 43.0 - 95.0                       | <b>22.0 - 99.0</b> |
| Missing                               | 0                          | 0                        | 0                              | 0                         | 0                  | 0                                         | 0                       | 0                             | 0                 | 0                       | 0                          | 0                   | 0                                 | <b>0</b>           |
| <b>Age (category)</b>                 |                            |                          |                                |                           |                    |                                           |                         |                               |                   |                         |                            |                     |                                   |                    |
| [18-49y], <i>n (%)</i>                | 90 (29.1)                  | 7 (4.7)                  | 91 (37.8)                      | 1 (6.2)                   | 45 (47.4)          | 17 (15.6)                                 | 36 (31)                 | 2 (3.4)                       | 40 (22.1)         | 23 (14.5)               | 443 (100)                  | 3 (7.9)             | 2 (3.8)                           | <b>800 (40.7)</b>  |
| [50+y], <i>n (%)</i>                  | 219 (70.9)                 | 141 (95.3)               | 150 (62.2)                     | 15 (93.8)                 | 50 (52.6)          | 92 (84.4)                                 | 80 (69)                 | 56 (96.6)                     | 141 (77.9)        | 136 (85.5)              | 0 (0)                      | 35 (92.1)           | 51 (96.2)                         | <b>1166 (59.3)</b> |
| Missing                               | 0                          | 0                        | 0                              | 0                         | 0                  | 0                                         | 0                       | 0                             | 0                 | 0                       | 0                          | 0                   | 0                                 | <b>0</b>           |
| <b>Menopausal status</b>              |                            |                          |                                |                           |                    |                                           |                         |                               |                   |                         |                            |                     |                                   |                    |
| Premenopausal, <i>n (%)</i>           | 81 (27.1)                  | 8 (5.6)                  | 95 (39.6)                      | 1 (6.2)                   | 46 (48.4)          | 0 (0)                                     | 0 (NaN)                 | 5 (8.6)                       | 47 (26)           | 19 (11.9)               | 0 (NaN)                    | 6 (15.8)            | 0 (NaN)                           | <b>308 (23.4)</b>  |
| Postmenopausal, <i>n (%)</i>          | 217 (72.6)                 | 134 (94.4)               | 145 (60.4)                     | 15 (93.8)                 | 49 (51.6)          | 87 (100)                                  | 0 (NaN)                 | 53 (91.4)                     | 134 (74)          | 140 (88.1)              | 0 (NaN)                    | 32 (84.2)           | 0 (NaN)                           | <b>1006 (76.5)</b> |
| Pregnant, <i>n (%)</i>                | 1 (0.3)                    | 0 (0)                    | 0 (0)                          | 0 (0)                     | 0 (0)              | 0 (0)                                     | 0 (NaN)                 | 0 (0)                         | 0 (0)             | 0 (0)                   | 0 (NaN)                    | 0 (0)               | 0 (NaN)                           | <b>1 (0.1)</b>     |
| Missing                               | 10                         | 6                        | 1                              | 0                         | 0                  | 22                                        | 116                     | 0                             | 0                 | 0                       | 443                        | 0                   | 53                                | <b>651</b>         |
| <b>TILs value (cont)</b>              |                            |                          |                                |                           |                    |                                           |                         |                               |                   |                         |                            |                     |                                   |                    |
| Mean                                  | 22.0                       | 26.9                     | 24.8                           | 11.9                      | 18.6               | 17.1                                      | 25.3                    | 22.5                          | 26.0              | 13.0                    | 37.6                       | 15.4                | 22.2                              | <b>25.4</b>        |
| SD                                    | 19.8                       | 24.0                     | 26.7                           | 20.1                      | 18.5               | 18.5                                      | 30.1                    | 25.1                          | 21.0              | 18.9                    | 33.3                       | 20.5                | 25.0                              | <b>26.5</b>        |
| Median                                | 15.0                       | 20.0                     | 15.0                           | 4.0                       | 10.0               | 10.0                                      | 10.0                    | 12.5                          | 20.0              | 4.0                     | 20.0                       | 7.0                 | 10.0                              | <b>15.0</b>        |
| Q1-Q3                                 | 5.0 - 35.0                 | 5.0 - 40.0               | 5.0 - 35.0                     | 1.0 - 15.0                | 5.0 - 25.0         | 0.0 - 30.0                                | 1.8 - 40.0              | 5.0 - 28.8                    | 10.0 - 40.0       | 2.0 - 15.0              | 5.0 - 70.0                 | 3.0 - 19.3          | 5.0 - 30.0                        | <b>5.0 - 40.0</b>  |
| Min-Max                               | 1.0 - 90.0                 | 0.0 - 90.0               | 1.0 - 95.0                     | 1.0 - 80.0                | 0.0 - 80.0         | 0.0 - 70.0                                | 1.0 - 90.0              | 1.0 - 80.0                    | 0.0 - 80.0        | 0.0 - 80.0              | 1.0 - 95.0                 | 1.0 - 80.0          | 1.0 - 95.0                        | <b>0.0 - 95.0</b>  |
| Missing                               | 0                          | 0                        | 0                              | 0                         | 0                  | 0                                         | 0                       | 0                             | 0                 | 0                       | 0                          | 0                   | 0                                 | <b>0</b>           |
| <b>TILs value (cat)</b>               |                            |                          |                                |                           |                    |                                           |                         |                               |                   |                         |                            |                     |                                   |                    |
| [0-29], <i>n (%)</i>                  | 217 (70.2)                 | 86 (58.1)                | 165 (68.5)                     | 14 (87.5)                 | 74 (77.9)          | 77 (70.6)                                 | 74 (63.8)               | 43 (74.1)                     | 115 (63.5)        | 134 (84.3)              | 231 (52.1)                 | 32 (84.2)           | 38 (71.7)                         | <b>1300 (66.1)</b> |
| [30-49], <i>n (%)</i>                 | 59 (19.1)                  | 31 (20.9)                | 33 (13.7)                      | 1 (6.2)                   | 10 (10.5)          | 20 (18.3)                                 | 14 (12.1)               | 3 (5.2)                       | 30 (16.6)         | 10 (6.3)                | 30 (6.8)                   | 2 (5.3)             | 6 (11.3)                          | <b>249 (12.7)</b>  |
| [50-74], <i>n (%)</i>                 | 28 (9.1)                   | 25 (16.9)                | 15 (6.2)                       | 0 (0)                     | 9 (9.5)            | 12 (11)                                   | 14 (12.1)               | 8 (13.8)                      | 30 (16.6)         | 13 (8.2)                | 87 (19.6)                  | 3 (7.9)             | 5 (9.4)                           | <b>249 (12.7)</b>  |
| [75-100], <i>n (%)</i>                | 5 (1.6)                    | 6 (4.1)                  | 28 (11.6)                      | 1 (6.2)                   | 2 (2.1)            | 0 (0)                                     | 14 (12.1)               | 4 (6.9)                       | 6 (3.3)           | 2 (1.3)                 | 95 (21.4)                  | 1 (2.6)             | 4 (7.5)                           | <b>168 (8.5)</b>   |
| Missing                               | 0                          | 0                        | 0                              | 0                         | 0                  | 0                                         | 0                       | 0                             | 0                 | 0                       | 0                          | 0                   | 0                                 | <b>0</b>           |
| <b>Histological subtype</b>           |                            |                          |                                |                           |                    |                                           |                         |                               |                   |                         |                            |                     |                                   |                    |
| Ductal, <i>n (%)</i>                  | 234 (84.5)                 | 92 (62.2)                | 197 (82.1)                     | 12 (75)                   | 0 (NaN)            | 69 (63.3)                                 | 99 (85.3)               | 33 (56.9)                     | 115 (63.5)        | 119 (74.8)              | 372 (84)                   | 24 (63.2)           | 34 (64.2)                         | <b>1427 (76.3)</b> |
| Lobular, <i>n (%)</i>                 | 5 (1.6)                    | 12 (8.1)                 | 5 (2.1)                        | 0 (0)                     | 0 (NaN)            | 3 (2.8)                                   | 0 (0)                   | 7 (12.1)                      | 0 (0)             | 3 (1.9)                 | 2 (0.5)                    | 1 (2.6)             | 3 (5.7)                           | <b>41 (2.2)</b>    |
| Medullary, <i>n (%)</i>               | 31 (10)                    | 3 (2)                    | 17 (7.1)                       | 0 (0)                     | 0 (NaN)            | 0 (0)                                     | 0 (0)                   | 0 (0)                         | 31 (17.1)         | 3 (1.9)                 | 34 (7.7)                   | 1 (2.6)             | 0 (0)                             | <b>120 (6.4)</b>   |
| Tubular, <i>n (%)</i>                 | 1 (0.3)                    | 2 (1.4)                  | 0 (0)                          | 0 (0)                     | 0 (NaN)            | 0 (0)                                     | 0 (0)                   | 0 (0)                         | 0 (0)             | 0 (0)                   | 0 (0)                      | 0 (0)               | 0 (0)                             | <b>3 (0.2)</b>     |
| Mucinous, <i>n (%)</i>                | 4 (1.3)                    | 2 (1.4)                  | 2 (0.8)                        | 0 (0)                     | 0 (NaN)            | 0 (0)                                     | 0 (0)                   | 0 (0)                         | 0 (0)             | 1 (0.6)                 | 0 (0)                      | 0 (0)               | 0 (0)                             | <b>9 (0.5)</b>     |
| Other, <i>n (%)</i>                   | 5 (1.6)                    | 32 (21.6)                | 10 (4.2)                       | 4 (25)                    | 0 (NaN)            | 37 (33.9)                                 | 9 (7.8)                 | 13 (22.4)                     | 35 (19.3)         | 31 (19.5)               | 35 (7.9)                   | 8 (21.1)            | 13 (24.5)                         | <b>232 (12.4)</b>  |
| Metaplastic, <i>n (%)</i>             | 2 (0.6)                    | 5 (3.4)                  | 9 (3.8)                        | 0 (0)                     | 0 (NaN)            | 0 (0)                                     | 8 (6.9)                 | 5 (8.6)                       | 0 (0)             | 24 (1.3)                | 0 (0)                      | 4 (10.5)            | 3 (5.7)                           | <b>38 (2)</b>      |
| Missing                               | 0                          | 0                        | 1                              | 0                         | 95                 | 0                                         | 0                       | 0                             | 0                 | 0                       | 0                          | 0                   | 0                                 | <b>96</b>          |

|                                    | <i>UBC<br/>(Vancouver)</i> | <i>Curie<br/>(Paris)</i> | <i>Erasmus<br/>(Rotterdam)</i> | <i>UniGe<br/>(Genova)</i> | <i>IGR (Paris)</i> | <i>National Cancer<br/>Center (Tokyo)</i> | <i>UUCM<br/>(Ulsan)</i> | <i>Leon Berard<br/>(Lyon)</i> | <i>Mayo (USA)</i> | <i>IEO<br/>(Milano)</i> | <i>NKI<br/>(Amsterdam)</i> | <i>IOV (Padova)</i> | <i>Sahlgrenska<br/>(Göteborg)</i> | <i>Overall</i> |
|------------------------------------|----------------------------|--------------------------|--------------------------------|---------------------------|--------------------|-------------------------------------------|-------------------------|-------------------------------|-------------------|-------------------------|----------------------------|---------------------|-----------------------------------|----------------|
|                                    | <i>n= 309</i>              | <i>n= 148</i>            | <i>n= 241</i>                  | <i>n= 16</i>              | <i>n= 95</i>       | <i>n= 109</i>                             | <i>n= 116</i>           | <i>n= 58</i>                  | <i>n= 181</i>     | <i>n= 159</i>           | <i>n= 443</i>              | <i>n= 38</i>        | <i>n= 53</i>                      | <i>n= 1966</i> |
| <b>Tumor size (cm)</b>             |                            |                          |                                |                           |                    |                                           |                         |                               |                   |                         |                            |                     |                                   |                |
| Mean                               | 2.3                        | 2.0                      | 2.6                            | 2.0                       | 2.1                | 1.7                                       | 1.6                     | 2.2                           | 2.0               | 1.6                     | 2.2                        | 1.9                 | 3.8                               | 2.1            |
| SD                                 | 1.3                        | 1.5                      | 1.4                            | 1.3                       | 0.9                | 1.0                                       | 1.4                     | 1.8                           | 1.8               | 1.6                     | 1.2                        | 1.8                 | 2.9                               | 1.5            |
| Median                             | 2.0                        | 1.7                      | 2.3                            | 2.0                       | 2.0                | 1.7                                       | 1.3                     | 1.9                           | 1.5               | 1.2                     | 2.0                        | 1.6                 | 2.7                               | 2.0            |
| Q1-Q3                              | 1.5 - 2.8                  | 0.9 - 3.0                | 1.7 - 3.0                      | 1.0 - 2.5                 | 1.6 - 2.5          | 1.1 - 2.5                                 | 0.5 - 2.0               | 0.8 - 2.5                     | 1.0 - 2.5         | 0.3 - 2.3               | 1.5 - 2.5                  | 0.8 - 2.2           | 1.9 - 5.2                         | 1.2 - 2.6      |
| Min-Max                            | 0.1 - 9.9                  | 0.3 - 8.0                | 0.6 - 9.0                      | 0.4 - 5.5                 | 0.0 - 5.0          | 0.1 - 4.6                                 | 0.2 - 10.0              | 0.1 - 8.0                     | 0.1 - 15.0        | 0.0 - 10.7              | 0.5 - 14.0                 | 0.2 - 10.0          | 0.3 - 13.4                        | 0.0 - 15.0     |
| Missing                            | 1                          | 0                        | 14                             | 1                         | 1                  | 0                                         | 0                       | 0                             | 0                 | 7                       | 50                         | 0                   | 0                                 | 74             |
| <b>Tumor category</b>              |                            |                          |                                |                           |                    |                                           |                         |                               |                   |                         |                            |                     |                                   |                |
| T1, <i>n (%)</i>                   | 170 (55.2)                 | 94 (63.5)                | 98 (43.2)                      | 9 (60)                    | 56 (59.6)          | 75 (68.8)                                 | 90 (77.6)               | 36 (62.1)                     | 123 (68)          | 107 (70.4)              | 256 (58)                   | 28 (73.7)           | 17 (32.1)                         | 1159 (59.7)    |
| T2, <i>n (%)</i>                   | 128 (41.6)                 | 48 (32.4)                | 117 (51.5)                     | 5 (33.3)                  | 38 (40.4)          | 34 (31.2)                                 | 22 (19)                 | 18 (31)                       | 51 (28.2)         | 39 (25.7)               | 175 (39.7)                 | 8 (21.1)            | 22 (41.5)                         | 705 (36.3)     |
| T3/T4, <i>n (%)</i>                | 10 (3.2)                   | 6 (4.1)                  | 12 (5.3)                       | 1 (6.7)                   | 0 (0)              | 0 (0)                                     | 4 (3.4)                 | 4 (6.9)                       | 7 (3.9)           | 6 (3.9)                 | 10 (2.3)                   | 2 (5.3)             | 14 (26.4)                         | 76 (3.9)       |
| Missing                            | 1                          | 0                        | 14                             | 1                         | 1                  | 0                                         | 0                       | 0                             | 0                 | 7                       | 2                          | 0                   | 0                                 | 26             |
| <b>T1 subsets</b>                  |                            |                          |                                |                           |                    |                                           |                         |                               |                   |                         |                            |                     |                                   |                |
| T1mi, <i>n (%)</i>                 | 5 (1.6)                    | 0 (0)                    | 0 (0)                          | 0 (0)                     | 4 (4.3)            | 3 (2.8)                                   | 0 (0)                   | 1 (1.7)                       | 6 (3.3)           | 21 (13.8)               | 0 (0)                      | 0 (0)               | 0 (0)                             | 40 (2.1)       |
| T1a, <i>n (%)</i>                  | 8 (2.6)                    | 13 (8.8)                 | 0 (0)                          | 1 (6.7)                   | 0 (0)              | 12 (11)                                   | 30 (25.9)               | 7 (12.1)                      | 13 (7.2)          | 30 (19.7)               | 2 (0.5)                    | 6 (15.8)            | 2 (3.8)                           | 124 (6.5)      |
| T1b, <i>n (%)</i>                  | 34 (11)                    | 33 (22.3)                | 17 (7.5)                       | 3 (20)                    | 8 (8.5)            | 12 (11)                                   | 19 (16.4)               | 8 (13.8)                      | 44 (24.3)         | 17 (11.2)               | 28 (6.8)                   | 7 (18.4)            | 2 (3.8)                           | 232 (12.1)     |
| T1c, <i>n (%)</i>                  | 123 (39.9)                 | 48 (32.4)                | 81 (35.7)                      | 5 (33.3)                  | 44 (46.8)          | 48 (44)                                   | 41 (35.3)               | 20 (34.5)                     | 60 (33.1)         | 39 (25.7)               | 199 (48.1)                 | 15 (39.5)           | 13 (24.5)                         | 736 (38.5)     |
| T2, <i>n (%)</i>                   | 128 (41.6)                 | 48 (32.4)                | 117 (51.5)                     | 5 (33.3)                  | 38 (40.4)          | 34 (31.2)                                 | 22 (19)                 | 18 (31)                       | 51 (28.2)         | 39 (25.7)               | 175 (42.3)                 | 8 (21.1)            | 22 (41.5)                         | 705 (36.9)     |
| T3/T4, <i>n (%)</i>                | 10 (3.2)                   | 6 (4.1)                  | 12 (5.3)                       | 1 (6.7)                   | 0 (0)              | 0 (0)                                     | 4 (3.4)                 | 4 (6.9)                       | 7 (3.9)           | 6 (3.9)                 | 10 (2.4)                   | 2 (5.3)             | 14 (26.4)                         | 76 (4)         |
| <b>Positive lymph nodes</b>        |                            |                          |                                |                           |                    |                                           |                         |                               |                   |                         |                            |                     |                                   |                |
| Mean                               | 0.4                        | 0.6                      | 1.2                            | 0.7                       | 0.9                | 0.6                                       | 0.3                     | 0.4                           | 0.4               | 1.0                     | 0.0                        | 0.2                 | 2.3                               | 0.5            |
| SD                                 | 1.6                        | 2.2                      | 3.0                            | 2.3                       | 2.7                | 2.6                                       | 1.2                     | 1.0                           | 1.6               | 4.1                     | 0.0                        | 1.0                 | 5.0                               | 2.2            |
| Median                             | 0.0                        | 0.0                      | 0.0                            | 0.0                       | 0.0                | 0.0                                       | 0.0                     | 0.0                           | 0.0               | 0.0                     | 0.0                        | 0.0                 | 0.0                               | 0.0            |
| Q1-Q3                              | 0.0 - 0.0                  | 0.0 - 0.0                | 0.0 - 0.0                      | 0.0 - 0.0                 | 0.0 - 0.5          | 0.0 - 0.0                                 | 0.0 - 0.0               | 0.0 - 1.0                     | 0.0 - 0.0         | 0.0 - 0.0               | 0.0 - 0.0                  | 0.0 - 0.0           | 0.0 - 1.5                         | 0.0 - 0.0      |
| Min-Max                            | 0.0 - 14.0                 | 0.0 - 20.0               | 0.0 - 17.0                     | 0.0 - 9.0                 | 0.0 - 21.0         | 0.0 - 22.0                                | 0.0 - 9.0               | 0.0 - 7.0                     | 0.0 - 12.0        | 0.0 - 38.0              | 0.0 - 0.0                  | 0.0 - 6.0           | 0.0 - 21.0                        | 0.0 - 38.0     |
| Missing                            | 6                          | 1                        | 0                              | 0                         | 0                  | 1                                         | 0                       | 1                             | 10                | 31                      | 0                          | 4                   | 6                                 | 60             |
| <b>Positive lymph nodes (cat.)</b> |                            |                          |                                |                           |                    |                                           |                         |                               |                   |                         |                            |                     |                                   |                |
| N0 (0), <i>n (%)</i>               | 262 (86.5)                 | 122 (83)                 | 184 (76.3)                     | 14 (87.5)                 | 71 (74.7)          | 91 (84.3)                                 | 103 (88.8)              | 42 (73.7)                     | 149 (87.1)        | 109 (85.2)              | 443 (100)                  | 32 (94.1)           | 29 (61.7)                         | 1651 (86.6)    |
| N1 (1-3), <i>n (%)</i>             | 30 (9.9)                   | 16 (10.9)                | 25 (10.4)                      | 1 (6.2)                   | 20 (21.1)          | 14 (13)                                   | 10 (8.6)                | 14 (24.6)                     | 16 (9.4)          | 11 (8.6)                | 0 (0)                      | 1 (2.9)             | 8 (17)                            | 166 (8.7)      |
| N2 (4-9), <i>n (%)</i>             | 9 (3)                      | 8 (5.4)                  | 23 (9.5)                       | 1 (6.2)                   | 2 (2.1)            | 1 (0.9)                                   | 3 (2.6)                 | 1 (1.8)                       | 4 (2.3)           | 3 (2.3)                 | 0 (0)                      | 1 (2.9)             | 6 (12.8)                          | 62 (3.3)       |
| N3 (10+), <i>n (%)</i>             | 2 (0.7)                    | 1 (0.7)                  | 9 (3.7)                        | 0 (0)                     | 2 (2.1)            | 2 (1.9)                                   | 0 (0)                   | 0 (0)                         | 2 (1.2)           | 5 (3.9)                 | 0 (0)                      | 0 (0)               | 4 (8.5)                           | 27 (1.4)       |
| Missing                            | 6                          | 1                        | 0                              | 0                         | 0                  | 1                                         | 0                       | 1                             | 10                | 31                      | 0                          | 4                   | 6                                 | 60             |
| <b>Histological grade</b>          |                            |                          |                                |                           |                    |                                           |                         |                               |                   |                         |                            |                     |                                   |                |
| 1, <i>n (%)</i>                    | 8 (2.7)                    | 29 (20.9)                | 5 (2.1)                        | 3 (18.8)                  | 2 (2.1)            | 7 (6.4)                                   | 4 (3.5)                 | 2 (3.6)                       | 4 (2.2)           | 22 (14.4)               | 3 (0.7)                    | 2 (5.4)             | 4 (7.5)                           | 95 (4.9)       |
| 2, <i>n (%)</i>                    | 64 (21.3)                  | 50 (36)                  | 44 (18.3)                      | 6 (37.5)                  | 44 (46.8)          | 38 (34.9)                                 | 45 (39.1)               | 20 (35.7)                     | 26 (14.4)         | 54 (35.3)               | 59 (13.3)                  | 11 (29.7)           | 12 (22.6)                         | 473 (24.4)     |
| 3, <i>n (%)</i>                    | 229 (76.1)                 | 60 (43.2)                | 191 (79.6)                     | 7 (43.8)                  | 48 (51.1)          | 64 (58.7)                                 | 66 (57.4)               | 34 (60.7)                     | 151 (83.4)        | 77 (50.3)               | 381 (86)                   | 24 (64.9)           | 37 (69.8)                         | 1369 (70.7)    |
| Missing                            | 8                          | 9                        | 1                              | 0                         | 1                  | 0                                         | 1                       | 2                             | 0                 | 6                       | 0                          | 1                   | 0                                 | 29             |



|                                               | <i>UBC<br/>(Vancouver)</i> | <i>Curie<br/>(Paris)</i>              | <i>Erasmus<br/>(Rotterdam)</i>                | <i>UniGe<br/>(Genova)</i> | <i>IGR (Paris)</i> | <i>National Cancer<br/>Center (Tokyo)</i>         | <i>UUCM<br/>(Ulsan)</i> | <i>Leon Berard<br/>(Lyon)</i>        | <i>Mayo (USA)</i> | <i>IEO<br/>(Milano)</i> | <i>NKI<br/>(Amsterdam)</i> | <i>IOV (Padova)</i> | <i>Sahlgrenska<br/>(Göteborg)</i>        | <i>Overall</i>     |
|-----------------------------------------------|----------------------------|---------------------------------------|-----------------------------------------------|---------------------------|--------------------|---------------------------------------------------|-------------------------|--------------------------------------|-------------------|-------------------------|----------------------------|---------------------|------------------------------------------|--------------------|
|                                               | <i>n= 309</i>              | <i>n= 148</i>                         | <i>n= 241</i>                                 | <i>n= 16</i>              | <i>n= 95</i>       | <i>n= 109</i>                                     | <i>n= 116</i>           | <i>n= 58</i>                         | <i>n= 181</i>     | <i>n= 159</i>           | <i>n= 443</i>              | <i>n= 38</i>        | <i>n= 53</i>                             | <i>n= 1966</i>     |
| <b>AJCC Prognostic Stages</b>                 |                            |                                       |                                               |                           |                    |                                                   |                         |                                      |                   |                         |                            |                     |                                          |                    |
| I, <i>n (%)</i>                               | 142 (48.3)                 | 83 (60.1)                             | 83 (36.7)                                     | 9 (60)                    | 46 (49.5)          | 68 (63)                                           | 81 (70.4)               | 27 (49.1)                            | 110 (64.3)        | 78 (66.7)               | 256 (58)                   | 23 (69.7)           | 12 (25.5)                                | <b>1018 (54.9)</b> |
| II, <i>n (%)</i>                              | 124 (42.2)                 | 35 (25.4)                             | 100 (44.2)                                    | 4 (26.7)                  | 35 (37.6)          | 31 (28.7)                                         | 29 (25.2)               | 18 (32.7)                            | 43 (25.1)         | 23 (19.7)               | 175 (39.7)                 | 7 (21.2)            | 19 (40.4)                                | <b>643 (34.7)</b>  |
| III, <i>n (%)</i>                             | 28 (9.5)                   | 20 (14.5)                             | 43 (19)                                       | 2 (13.3)                  | 12 (12.9)          | 9 (8.3)                                           | 5 (4.3)                 | 10 (18.2)                            | 18 (10.5)         | 16 (13.7)               | 10 (2.3)                   | 3 (9.1)             | 16 (34)                                  | <b>192 (10.4)</b>  |
| Missing                                       | 15                         | 10                                    | 15                                            | 1                         | 2                  | 1                                                 | 1                       | 3                                    | 10                | 42                      | 2                          | 5                   | 6                                        | <b>113</b>         |
| <b>AJCC Anatomic Stages</b>                   |                            |                                       |                                               |                           |                    |                                                   |                         |                                      |                   |                         |                            |                     |                                          |                    |
| I, <i>n (%)</i>                               | 147 (48.7)                 | 88 (59.9)                             | 83 (36.6)                                     | 9 (60)                    | 46 (48.9)          | 68 (63)                                           | 82 (70.7)               | 29 (50.9)                            | 110 (64.3)        | 80 (66.1)               | 256 (58)                   | 24 (70.6)           | 12 (25.5)                                | <b>1034 (55)</b>   |
| II, <i>n (%)</i>                              | 141 (46.7)                 | 48 (32.7)                             | 111 (48.9)                                    | 5 (33.3)                  | 44 (46.8)          | 37 (34.3)                                         | 31 (26.7)               | 25 (43.9)                            | 52 (30.4)         | 33 (27.3)               | 185 (42)                   | 9 (26.5)            | 22 (46.8)                                | <b>743 (39.5)</b>  |
| III, <i>n (%)</i>                             | 14 (4.6)                   | 11 (7.5)                              | 33 (14.5)                                     | 1 (6.7)                   | 4 (4.3)            | 3 (2.8)                                           | 3 (2.6)                 | 3 (5.3)                              | 9 (5.3)           | 8 (6.6)                 | 0 (0)                      | 1 (2.9)             | 13 (27.7)                                | <b>103 (5.5)</b>   |
| Missing                                       | 7                          | 1                                     | 14                                            | 1                         | 1                  | 1                                                 | 0                       | 1                                    | 10                | 38                      | 2                          | 4                   | 6                                        | <b>86</b>          |
|                                               | <i>UBC<br/>(Vancouver)</i> | <i>Curie<br/>(Paris)</i>              | <i>Erasmus<br/>(Rotterdam)</i>                | <i>UniGe<br/>(Genova)</i> | <i>IGR (Paris)</i> | <i>National Cancer<br/>Center (Tokyo)</i>         | <i>UUCM<br/>(Ulsan)</i> | <i>Leon Berard<br/>(Lyon)</i>        | <i>Mayo (USA)</i> | <i>IEO<br/>(Milano)</i> | <i>NKI<br/>(Amsterdam)</i> | <i>IOV (Padova)</i> | <i>Sahlgrenska<br/>(Göteborg)</i>        | <i>Overall</i>     |
|                                               | <i>n= 309</i>              | <i>n= 148</i>                         | <i>n= 241</i>                                 | <i>n= 16</i>              | <i>n= 95</i>       | <i>n= 109</i>                                     | <i>n= 116</i>           | <i>n= 58</i>                         | <i>n= 181</i>     | <i>n= 159</i>           | <i>n= 443</i>              | <i>n= 38</i>        | <i>n= 53</i>                             | <i>n= 1966</i>     |
| <b>Radiotherapy</b>                           |                            |                                       |                                               |                           |                    |                                                   |                         |                                      |                   |                         |                            |                     |                                          |                    |
| No, <i>n (%)</i>                              | 138 (44.7)                 | 40 (27)                               | 64 (27.6)                                     | 5 (31.2)                  | 15 (15.8)          | 66 (60.6)                                         | 75 (64.7)               | 23 (39.7)                            | 105 (58.7)        | 48 (30.2)               | 125 (28.2)                 | 13 (34.2)           | 26 (50)                                  | <b>743 (38)</b>    |
|                                               | <i>UBC<br/>(Vancouver)</i> | <i>Institut<br/>Curie<br/>(Paris)</i> | <i>Erasmus<br/>University<br/>(Rotterdam)</i> | <i>UniGe<br/>(Genova)</i> | <i>IGR (Paris)</i> | <i>National<br/>Cancer<br/>Center<br/>(Tokyo)</i> | <i>UUCM<br/>(Ulsan)</i> | <i>Centre Leon<br/>Berard (Lyon)</i> | <i>Mayo (USA)</i> | <i>IEO<br/>(Milano)</i> | <i>NKI<br/>(Amsterdam)</i> | <i>IOV (Padova)</i> | <i>Sahlgrenska<br/>UH<br/>(Göteborg)</i> | <i>Overall</i>     |
|                                               | <i>n= 309</i>              | <i>n= 148</i>                         | <i>n= 241</i>                                 | <i>n= 16</i>              | <i>n= 95</i>       | <i>n= 109</i>                                     | <i>n= 116</i>           | <i>n= 58</i>                         | <i>n= 181</i>     | <i>n= 159</i>           | <i>n= 443</i>              | <i>n= 38</i>        | <i>n= 53</i>                             | <i>n= 1966</i>     |
| Yes, <i>n (%)</i>                             | 171 (55.3)                 | 108 (73)                              | 168 (72.4)                                    | 11 (68.8)                 | 80 (84.2)          | 43 (39.4)                                         | 41 (35.3)               | 35 (60.3)                            | 74 (41.3)         | 111 (69.8)              | 318 (71.8)                 | 25 (65.8)           | 26 (50)                                  | <b>1211 (62)</b>   |
| Missing                                       | 0                          | 0                                     | 9                                             | 0                         | 0                  | 0                                                 | 0                       | 0                                    | 2                 | 0                       | 0                          | 0                   | 1                                        | <b>12</b>          |
| <b>Type of surgery</b>                        |                            |                                       |                                               |                           |                    |                                                   |                         |                                      |                   |                         |                            |                     |                                          |                    |
| Partial mastectomy, <i>n (%)</i>              | 163 (52.8)                 | 97 (65.5)                             | 141 (58.5)                                    | 10 (62.5)                 | 70 (73.7)          | 51 (46.8)                                         | 81 (69.8)               | 23 (39.7)                            | 87 (48.1)         | 132 (83)                | 298 (68.3)                 | 30 (78.9)           | 18 (34)                                  | <b>1201 (61.3)</b> |
| Complete mastectomy, <i>n</i>                 | 146 (47.2)                 | 51 (34.5)                             | 100 (41.5)                                    | 6 (37.5)                  | 25 (26.3)          | 58 (53.2)                                         | 35 (30.2)               | 35 (60.3)                            | 94 (51.9)         | 27 (17)                 | 138 (31.7)                 | 8 (21.1)            | 35 (66)                                  | <b>758 (38.7)</b>  |
| Missing                                       | 0                          | 0                                     | 0                                             | 0                         | 0                  | 0                                                 | 0                       | 0                                    | 0                 | 0                       | 7                          | 0                   | 0                                        | <b>7</b>           |
| <b>Overall survival</b>                       |                            |                                       |                                               |                           |                    |                                                   |                         |                                      |                   |                         |                            |                     |                                          |                    |
| Alive, <i>n (%)</i>                           | 85 (27.5)                  | 125 (84.5)                            | 128 (53.1)                                    | 10 (62.5)                 | 59 (62.1)          | 94 (86.2)                                         | 89 (76.7)               | 51 (87.9)                            | 84 (46.4)         | 123 (77.4)              | 275 (62.1)                 | 22 (57.9)           | 18 (34)                                  | <b>1163 (59.2)</b> |
| Dead, <i>n (%)</i>                            | 224 (72.5)                 | 23 (15.5)                             | 113 (46.9)                                    | 6 (37.5)                  | 36 (37.9)          | 15 (13.8)                                         | 27 (23.3)               | 7 (12.1)                             | 97 (53.6)         | 36 (22.6)               | 168 (37.9)                 | 16 (42.1)           | 35 (66)                                  | <b>803 (40.8)</b>  |
| Missing                                       | 0                          | 0                                     | 0                                             | 0                         | 0                  | 0                                                 | 0                       | 0                                    | 0                 | 0                       | 0                          | 0                   | 0                                        | <b>0</b>           |
| <b>Follow-up (years) □*</b>                   |                            |                                       |                                               |                           |                    |                                                   |                         |                                      |                   |                         |                            |                     |                                          |                    |
| Median*                                       | 32.5                       | 5.7                                   | 11.2                                          | 6.2                       | 22.1               | 8.0                                               | 9.6                     | 1.7                                  | 15.0              | 9.9                     | 24.0                       | 7.2                 | 8.4                                      | <b>18.0</b>        |
| Confidence interval 95%                       | 32.0 - 33.5                | 4.6 - 6.3                             | 10.3 - 13.7                                   | 6.0 - NA                  | 21.6 - 23.2        | 6.7 - 9.2                                         | 9.0 - 10.1              | 0.5 - 3.0                            | 12.7 - 19.3       | 8.9 - 10.9              | 24.0 - 25.0                | 6.6 - 10.0          | 8.2 - NA                                 | <b>15.3 - 20.0</b> |
| Min-Max                                       | 0.1 - 35.2                 | 0.0 - 14.1                            | 0.3 - 27.0                                    | 2.8 - 10.4                | 0.9 - 25.8         | 0.0 - 17.8                                        | 0.3 - 21.8              | 0.1 - 10.2                           | 0.0 - 28.8        | 0.0 - 21.7              | 0.0 - 29.0                 | 0.4 - 13.7          | 0.5 - 11.6                               | <b>0.0 - 35.2</b>  |
| *Calculated with reverse Kaplan-Meier method. |                            |                                       |                                               |                           |                    |                                                   |                         |                                      |                   |                         |                            |                     |                                          |                    |

## 2. TIL distribution

eFigure 2-A. Distribution of the Stromal TILs in the Overall Study

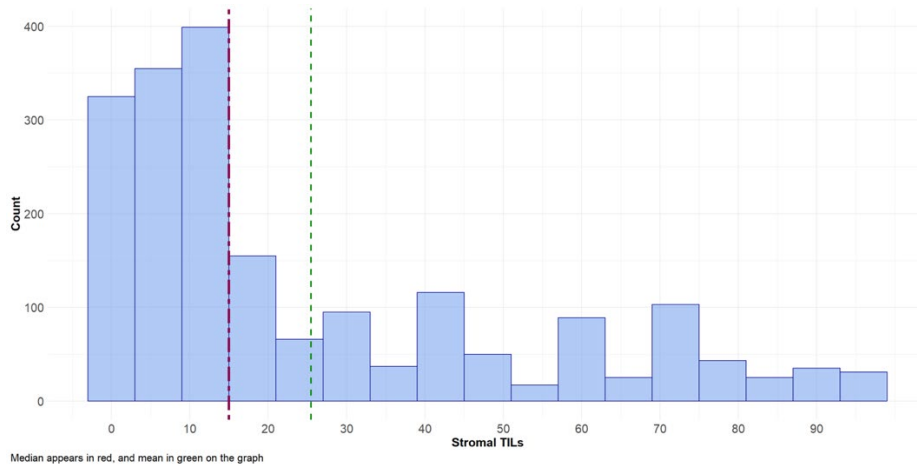

eFigure 2-B. Distribution of the Stromal TILs per Cohort

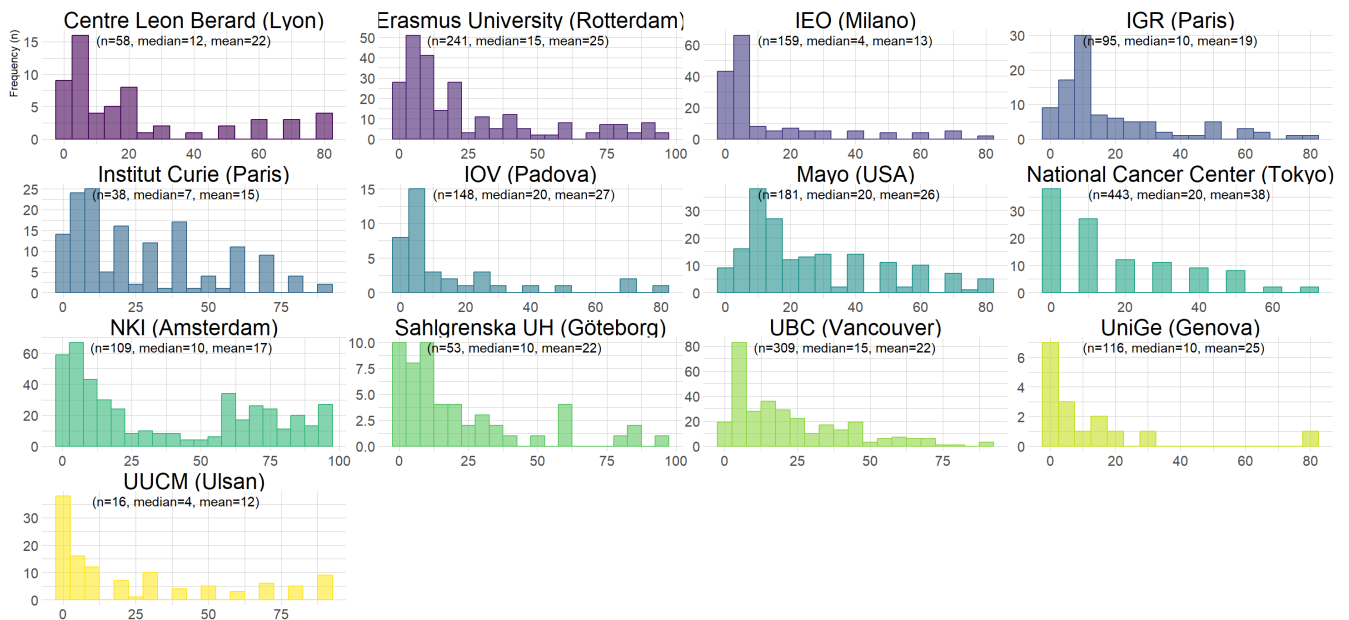

eTable 2-A. Summary of TILs Values by Cohort

| Study                          | Min | Quantile 25% | Median | Mean | Std  | Quantile 75% | Max | n   |
|--------------------------------|-----|--------------|--------|------|------|--------------|-----|-----|
| Centre Leon Berard (Lyon)      | 1   | 5.0          | 12.5   | 22.5 | 25.1 | 28.8         | 80  | 58  |
| Erasmus University (Rotterdam) | 1   | 5.0          | 15.0   | 24.8 | 26.7 | 35.0         | 95  | 241 |
| IEO (Milano)                   | 0   | 2.0          | 4.0    | 13.0 | 18.9 | 15.0         | 80  | 159 |
| IGR (Paris)                    | 0   | 5.0          | 10.0   | 18.6 | 18.5 | 25.0         | 80  | 95  |
| Institut Curie (Paris)         | 0   | 5.0          | 20.0   | 26.9 | 24.0 | 40.0         | 90  | 148 |
| IOV (Padova)                   | 1   | 3.0          | 7.0    | 15.4 | 20.5 | 19.2         | 80  | 38  |
| Mayo (USA)                     | 0   | 10.0         | 20.0   | 26.0 | 21.0 | 40.0         | 80  | 181 |
| National Cancer Center (Tokyo) | 0   | 0.0          | 10.0   | 17.1 | 18.5 | 30.0         | 70  | 109 |
| NKI (Amsterdam)                | 1   | 5.0          | 20.0   | 37.6 | 33.3 | 70.0         | 95  | 443 |
| Sahlgrenska UH (Göteborg)      | 1   | 5.0          | 10.0   | 22.2 | 25.0 | 30.0         | 95  | 53  |
| UBC (Vancouver)                | 1   | 5.0          | 15.0   | 22.0 | 19.8 | 35.0         | 90  | 309 |
| UniGe (Genova)                 | 1   | 1.0          | 4.0    | 11.9 | 20.1 | 15.0         | 80  | 16  |
| UUCM (Ulsan)                   | 1   | 1.8          | 10.0   | 25.3 | 30.1 | 40.0         | 90  | 116 |

| eTable 2-B. Correlation Matrix Between Clinicopathological Characteristics and TILs |                           |                                          |                                       |                                          |
|-------------------------------------------------------------------------------------|---------------------------|------------------------------------------|---------------------------------------|------------------------------------------|
|                                                                                     | Tumor size                | Histological grade                       | Number of lymph nodes                 | Stromal TILs                             |
| Age                                                                                 | 0.0 [0.0; 0.1]<br>p =0.12 | -0.2 [-0.2; -0.1]<br>p ≤10 <sup>-5</sup> | 0.3 [0.3; 0.3]<br>p ≤10 <sup>-6</sup> | -0.2 [-0.2; -0.1]<br>p ≤10 <sup>-6</sup> |
| Tumor size                                                                          | ---                       | 0.3 [0.2; 0.3]<br>p ≤10 <sup>-6</sup>    | 0.2 [0.2; 0.3]<br>p ≤10 <sup>-6</sup> | 0.0 [0.0; 0.1]<br>p =0.22                |
| Histological grade                                                                  | ---                       | ---                                      | 0.0 [0.0; 0.1]<br>p =0.45             | 0.3 [0.3; 0.3]<br>p ≤10 <sup>-6</sup>    |
| Number of lymph nodes                                                               | ---                       | ---                                      | ---                                   | 0.0 [-0.1; 0.0]<br>p =0.18               |

Pairwise correlation between the clinicopathological characteristics using Spearman's correlation (when both or at least one of the two variables compared were numerical). Otherwise, we used the Kendall's tau when the two variables compared were categorical. The correlation was assessed, for each pair, on complete observations (pairwise complete observations technique for the handling of missing data). Correlation coefficients values and confidence intervals obtained with bootstrap are given in Table 2.

eFigure 2-B. Graphical Display of the Correlation Matrix Between Clinicopathological Characteristics and TILs

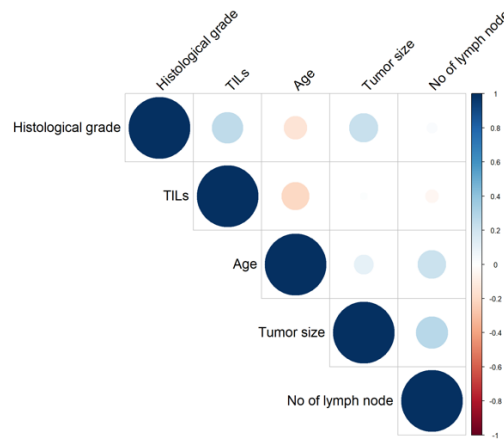

eFigure 2-C. Scatterplot of Age vs TILs

Association between stromal TILs and age

The blue lines correspond to a fitted linear regression model prediction together with its 95% confidence interval band (grey zone).

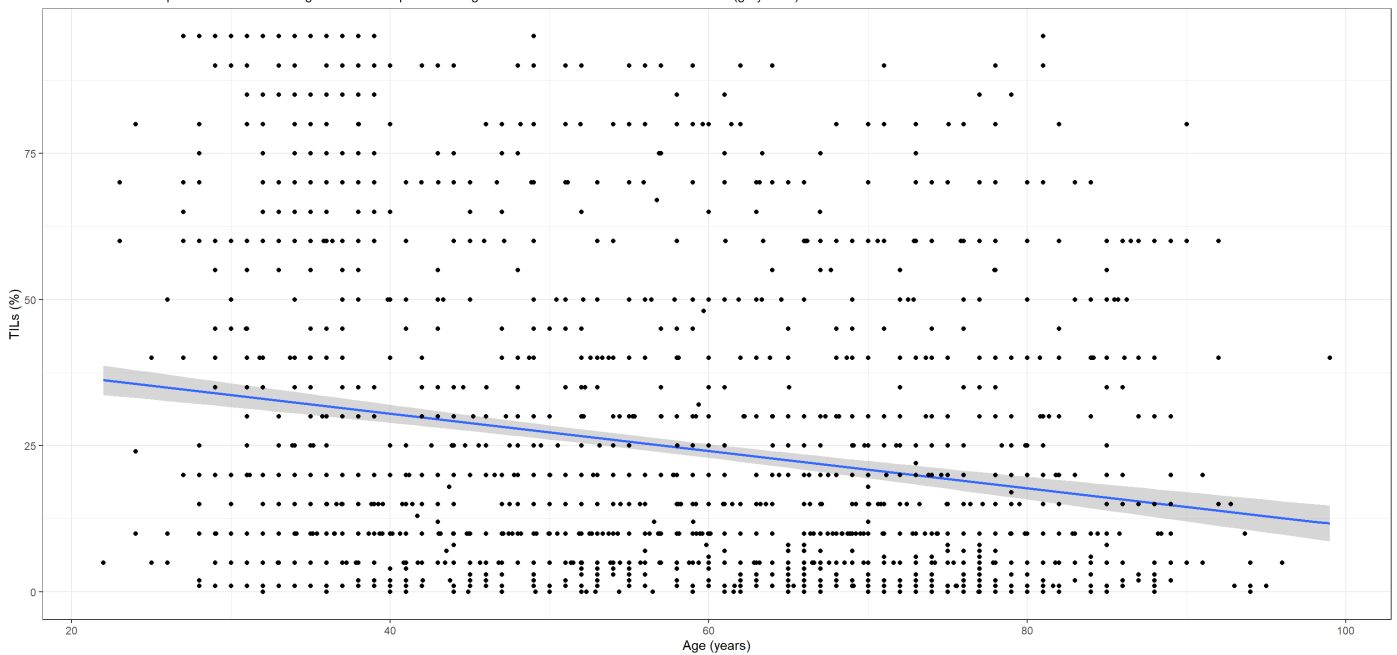

While the association between age and TILs was significant, the Spearman correlation value was relatively weak (-0.2). We graphed age according to TILs level to evaluate if both variables are linearly linked. No pattern is easily visible which suggests the absence of a linear relationship between age and the level of TILs.

### 3. Statistical Methods

#### Survival endpoints

Composite events were defined according to the guidelines of the Updated Standardized Definitions for Efficacy End Points (STEEP) in Adjuvant Breast Cancer Clinical Trials, second edition<sup>1</sup>. Survival times were calculated from the date of surgery in all studies when it was available and from date of diagnosis when it was not available. This later was the case for: UBC (Vancouver) and NKI (Amsterdam). Then survival delays were calculated from this start point to the date of occurrence of the event. Patients who did not experience the event are censored at the date of last follow-up. Considered events were: death, local and regional recurrence, distant recurrence, contralateral invasive breast cancer and second primary malignancy (other than breast cancer) for the following composite events:

eTable 3-A. Breast Cancer Clinical Trial End Points per STEEP 2.0

|       | Death<br>(any cause) | Distant recurrence | Local regional<br>invasive<br>recurrence | Invasive ipsilateral<br>breast tumor<br>recurrence | Second primary<br>invasive cancer<br>(non-breast) | Invasive<br>contralateral breast<br>cancer |
|-------|----------------------|--------------------|------------------------------------------|----------------------------------------------------|---------------------------------------------------|--------------------------------------------|
| OS    | X                    |                    |                                          |                                                    |                                                   |                                            |
| DDFS  | X                    | X                  |                                          |                                                    | X                                                 |                                            |
| DRFS  | X                    | X                  |                                          |                                                    |                                                   |                                            |
| RFS   | X                    | X                  | X                                        | X                                                  |                                                   |                                            |
| IBCFS | X                    | X                  | X                                        | X                                                  |                                                   | X                                          |
| IDFS  | X                    | X                  | X                                        | X                                                  | X                                                 | X                                          |

In older cohorts, invasive contra-lateral breast cancer may not be differentiated from second cancer. This is the case in the IGR cohort (Paris) where the two events are confounded on a single variable. Consequently, the DDFS and IBCFS criteria will be slightly overestimated by 7% and 5% respectively.

In addition, some cohorts do not differentiate the ipsilateral invasive event from locoregional relapse; the former being counted as locoregional relapse without detail. No information on second primary invasive cancer (non breast) was available for the UBC (Vancouver) study.

#### Number of events

eTable 3-B. Number and Percentage of Composite Events, by Study and in Total

|                                        | OS                 | DDFS               | DRFS               | RFS                | IBCFS               | IDFS                |
|----------------------------------------|--------------------|--------------------|--------------------|--------------------|---------------------|---------------------|
| UBC (Vancouver) (n=309)                | 224 (72.5%)        | 225 (72.8%)        | 225(72.8%)         | 229 (74.1%)        | 239 (77.3%)         | 239 (77.3%)         |
| Institut Curie (Paris) (n=148)         | 23 (15.5%)         | 33 (22.3%)         | 27 (18.2%)         | 33 (22.3%)         | 34 (23%)            | 39 (26.4%)          |
| Erasmus University (Rotterdam) (n=241) | 113 (46.9%)        | 128 (53.1%)        | 116 (48.1%)        | 122 (50.6%)        | 134 (55.6%)         | 143 (59.3%)         |
| UniGe (Genova) (n=16)                  | 6 (37.5%)          | 7 (43.8%)          | 6 (37.5%)          | 6 (37.5%)          | 6 (37.5%)           | 7 (43.8%)           |
| IGR (Paris) (n=95)                     | 36 (37.9%)         | 50 (52.6%)         | 39 (41.1%)         | 46 (48.4%)         | 56 (58.9%)          | 56 (58.9%)          |
| National Cancer Center (Tokyo) (n=109) | 15 (13.8%)         | 23 (21.1%)         | 21 (19.3%)         | 27 (24.8%)         | 28 (25.7%)          | 30 (27.5%)          |
| UUCM (Ulsan) (n=116)                   | 27 (23.3%)         | 31 (26.7%)         | 29 (25%)           | 38 (32.8%)         | 40 (34.5%)          | 41 (35.3%)          |
| Centre Leon Berard (Lyon) (n=58)       | 7 (12.1%)          | 8 (13.8%)          | 7 (12.1%)          | 10 (17.2%)         | 11 (19%)            | 12 (20.7%)          |
| Mayo (USA) (n=181)                     | 97 (53.6%)         | 104 (57.5%)        | 100 (55.2%)        | 103 (56.9%)        | 114 (63%)           | 118 (65.2%)         |
| IEO (Milano) (n=159)                   | 36 (22.6%)         | 39 (24.5%)         | 37 (23.3%)         | 52 (32.7%)         | 58 (36.5%)          | 60 (37.7%)          |
| NKI (Amsterdam) (n=443)                | 168 (37.9%)        | 191 (43.1%)        | 174 (39.3%)        | 221 (49.9%)        | 263 (59.4%)         | 273 (61.6%)         |
| IOV (Padova) (n=38)                    | 16 (42.1%)         | 18 (47.4%)         | 16 (42.1%)         | 17 (44.7%)         | 17 (44.7%)          | 19 (50%)            |
| Sahlgrenska UH (Göteborg) (n=53)       | 35 (66%)           | 37 (69.8%)         | 35 (66%)           | 36 (67.9%)         | 36 (67.9%)          | 37 (69.8%)          |
| <b>TOTAL (n=1966)</b>                  | <b>803 (40.8%)</b> | <b>894 (45.5%)</b> | <b>832 (42.3%)</b> | <b>940 (47.8%)</b> | <b>1036 (52.7%)</b> | <b>1074 (54.6%)</b> |

eTable 3-C. provides the number and percentage of each **first** event occurring for each patient. In case of simultaneous events, the order was as follows: Invasive ipsilateral breast tumor recurrence, Local regional invasive recurrence, Invasive contralateral breast cancer, Second primary invasive cancer, Distant recurrence and Death.

| eTable 3-C. Number and Percentage of First Events, by Study and in Total |                   |                 |                                 |                                    |                |                                         |                 |                              |                 |               |                                      |                    |                    |             |
|--------------------------------------------------------------------------|-------------------|-----------------|---------------------------------|------------------------------------|----------------|-----------------------------------------|-----------------|------------------------------|-----------------|---------------|--------------------------------------|--------------------|--------------------|-------------|
|                                                                          | UniGe<br>(Genova) | IOV<br>(Padova) | Sahlgrenska<br>UH<br>(Göteborg) | Centre<br>Leon<br>Berard<br>(Lyon) | IGR<br>(Paris) | National<br>Cancer<br>Center<br>(Tokyo) | UUCM<br>(Ulsan) | Institut<br>Curie<br>(Paris) | IEO<br>(Milano) | Mayo<br>(USA) | Erasmus<br>University<br>(Rotterdam) | UBC<br>(Vancouver) | NKI<br>(Amsterdam) | TOTAL       |
| Death<br>(any cause)                                                     | 4 (25%)           | 10 (26%)        | 13 (25%)                        | 6 (10%)                            | 5<br>(5%)      | 4 (4%)                                  | 14<br>(12%)     | 7 (5%)                       | 12 (8%)         | 44<br>(24%)   | 4 (2%)                               | 120 (39%)          | 45 (10%)           | 288         |
| Distant<br>recurrence                                                    | 1 (6%)            | 2 (5%)          | 14 (26%)                        | 3 (5%)                             | 25<br>(26%)    | 8 (7%)                                  | 6 (5%)          | 15<br>(10%)                  | 14 (9%)         | 35<br>(19%)   | 58 (24%)                             | 44 (14%)           | 59 (13%)           | 284         |
| Local<br>regional<br>invasive<br>recurrence                              | 0 (0%)            | 4 (11%)         | 2 (4%)                          | 1 (2%)                             | 13<br>(14%)    | 6 (6%)                                  | 16<br>(14%)     | 3 (2%)                       | 20<br>(13%)     | 4<br>(2%)     | 36 (15%)                             | 25 (8%)            | 12 (3%)            | 142         |
| Invasive<br>ipsilateral<br>breast tumor<br>recurrence                    | 0 (0%)            | 0 (0%)          | 3 (6%)                          | 0 (0%)                             | 0<br>(0%)      | 4 (4%)                                  | 0 (0%)          | 5 (3%)                       | 0 (0%)          | 5<br>(3%)     | 5 (2%)                               | 29 (9%)            | 59 (13%)           | 110         |
| Invasive<br>contralateral<br>breast<br>cancer                            | 1 (6%)            | 0 (0%)          | 0 (0%)                          | 1 (2%)                             | 0<br>(0%)      | 1 (1%)                                  | 3 (3%)          | 1 (1%)                       | 6 (4%)          | 14<br>(8%)    | 22 (9%)                              | 21 (7%)            | 70 (16%)           | 140         |
| Second<br>primary<br>invasive<br>cancer                                  | 1 (6%)            | 3 (8%)          | 5 (9%)                          | 1 (2%)                             | 13<br>(14%)    | 7 (6%)                                  | 2 (2%)          | 8 (5%)                       | 8 (5%)          | 16<br>(9%)    | 18 (7%)                              | Missing            | 28 (6%)            | 110         |
| Alive                                                                    | 9 (56%)           | 19 (50%)        | 16 (30%)                        | 46<br>(79%)                        | 39<br>(41%)    | 79<br>(72%)                             | 75<br>(65%)     | 109<br>(74%)                 | 99<br>(62%)     | 63<br>(35%)   | 98 (41%)                             | 70 (23%)           | 170 (38%)          | 892         |
| <b>TOTAL</b>                                                             | <b>16</b>         | <b>38</b>       | <b>53</b>                       | <b>58</b>                          | <b>95</b>      | <b>109</b>                              | <b>116</b>      | <b>148</b>                   | <b>159</b>      | <b>181</b>    | <b>241</b>                           | <b>309</b>         | <b>443</b>         | <b>1966</b> |

## Statistical models

The Cox regression models will be used to test the independent prognostic value of the TILs to the standard clinicopathological variables through the use of likelihood ratio tests. Our standard clinicopathological variables include tumor size (continuous), tumor grade (well differentiated, moderately differentiated and poorly differentiated), age (continuous), numbers of positive lymph nodes (continuous), and radiotherapy treatment (RT) (yes/no). We will test the log-linearity assumption of the continuous variables of the model using fitting with linear tail-restricted cubic splines. The models are stratified on study. The following models will be fitted:

- Model 1: TILs (univariable)
- Model 2: age + tumor size + tumor grade + positive lymph nodes + RT
- Model 3: age + tumor size + tumor grade + positive lymph nodes + RT + TILs

For each model, the followings will be calculated: adjusted hazard ratios (HR), associated 95% confidence interval and p-value for each variable. The prognostic value of the TILs will be tested by comparing likelihood values between model 1 and the null model with a likelihood ratio test. The independent prognostic additional value of stromal TILs will be tested by comparing likelihood values between models 2 and 3 with a likelihood ratio test.

We will test the prognostic value of the TILs on each of the endpoints detailed above: IDFS, OS, DDFS, RFS and IBCFS

Before the statistical analysis, all the continuous variables included in the model will be tested for their linear effect. In case of non-linear effect, a fitted cubic spline version of the variable will be considered.

## Pre-tests on log-linearity

All the continuous variables included in the model (Age, Tumor size) are evaluated for their linear effect.

## Univariable graphic

Each continuous variable with its version fitted by cubic splines with **3 knots** (in red) is plotted with its confidence interval. Knots are located at the 0.1, 0.5 and 0.9<sup>th</sup> quantile. OS is the event of interest. The 'Positive nodes' variable was not tested for its linear effect; its distribution is incompatible with the identification of 3 knots.

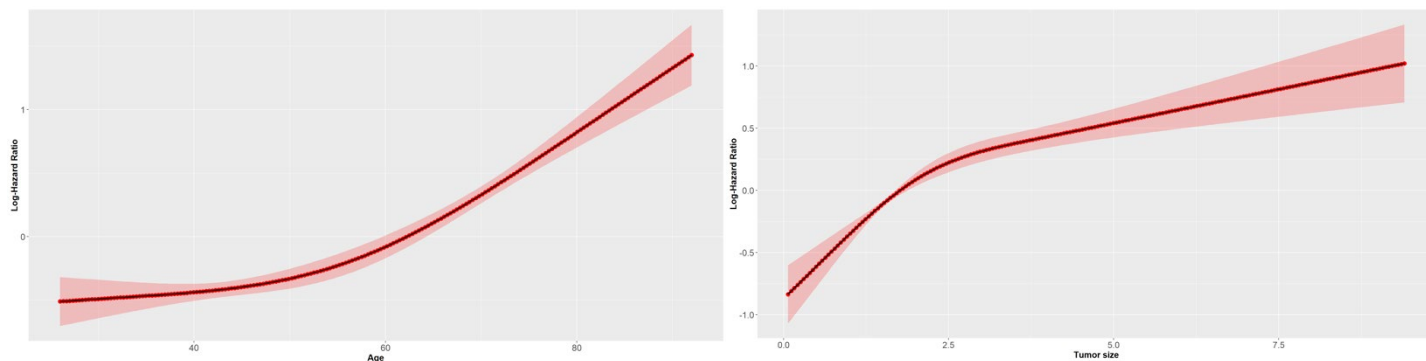

## Handling of missing values

In this section, we look at the missing values in the adjustment variables which are: age, number of positive lymph nodes, tumor size, histological grade and radiotherapy.

eTable 3-D. Details on Missing Values

|                   | Tumor size | Lymph nodes | Grade | Radiotherapy |
|-------------------|------------|-------------|-------|--------------|
| Missing (n)       | 74         | 60          | 29    | 12           |
| % of total values | 4          | 3           | 1     | 1            |

173 (8.8%) patients have at least one missing value. Among whom, 2 (0.1%) patients have two missing values.

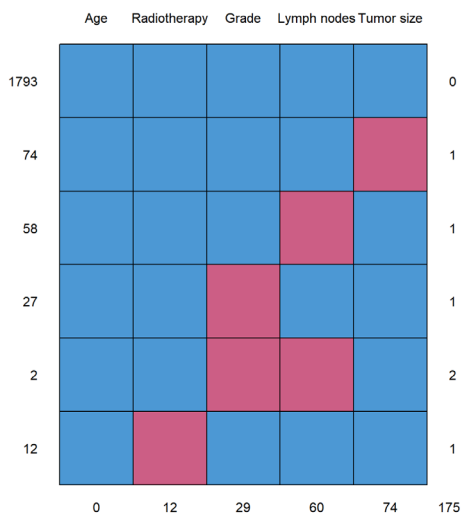

eFigure 3-A. Pattern of Missing Values

eTable 3-E. Percentages and Contribution of Missing Values in Each Study on the 5 Adjustment Variables

|                                | % of missing values | Contribution on missing values |
|--------------------------------|---------------------|--------------------------------|
| UBC (Vancouver)                | 4.90%               | 8.70%                          |
| Institut Curie (Paris)         | 6.80%               | 5.80%                          |
| Erasmus University (Rotterdam) | 10%                 | 13.90%                         |
| UniGe (Genova)                 | 6.20%               | 0.60%                          |
| IGR (Paris)                    | 2.10%               | 1.20%                          |
| National Cancer Center (Tokyo) | 0.90%               | 0.60%                          |
| UUCM (Ulsan)                   | 0.90%               | 0.60%                          |
| Centre Leon Berard (Lyon)      | 5.20%               | 1.70%                          |
| Mayo (USA)                     | 6.60%               | 6.90%                          |

|                           |        |        |
|---------------------------|--------|--------|
| IEO (Milano)              | 26.40% | 24.30% |
| NKI (Amsterdam)           | 11.30% | 28.90% |
| IOV (Padova)              | 13.20% | 2.90%  |
| Sahlgrenska UH (Göteborg) | 13.20% | 4%     |

eTable 3-F. Comparison of the Characteristics of the Population With and Without Missing Values

|                                       | <i>Patients with at least one missing value</i><br><i>n= 173</i> | <i>Patients without missing value</i><br><i>n= 1793</i> | <i>Overall</i><br><i>n= 1966</i> |
|---------------------------------------|------------------------------------------------------------------|---------------------------------------------------------|----------------------------------|
| <b>Date of surgery (or diagnosis)</b> |                                                                  |                                                         |                                  |
| <b>Min-Max</b>                        | 1979-2017                                                        | 1979-2017                                               | 1979-2017                        |
| <b>Age</b>                            |                                                                  |                                                         |                                  |
| Mean                                  | 57.7                                                             | 55.7                                                    | 55.9                             |
| SD                                    | 20.3                                                             | 17.2                                                    | 17.5                             |
| Median                                | 59.0                                                             | 56.0                                                    | 56.0                             |
| Q1-Q3                                 | 37.0 - 75.0                                                      | 39.0 - 70.0                                             | 38.9 - 71.0                      |
| Min-Max                               | 23.0 - 99.0                                                      | 22.0 - 96.0                                             | 22.0 - 99.0                      |
| <i>n</i>                              | 173                                                              | 1793                                                    | 1966                             |
| Missing                               | 0                                                                | 0                                                       | 0                                |
| <b>Menopausal status</b>              |                                                                  |                                                         |                                  |
| Premenopausal, <i>n</i> (%)           | 18 ( 15.7 )                                                      | 290 ( 24.2 )                                            | 308 ( 23.4 )                     |
| Postmenopausal, <i>n</i> (%)          | 97 ( 84.3 )                                                      | 909 ( 75.8 )                                            | 1006 ( 76.5 )                    |
| Pregnant, <i>n</i> (%)                | 0 ( 0 )                                                          | 1 ( 0.1 )                                               | 1 ( 0.1 )                        |
| Missing                               | 58                                                               | 593                                                     | 651                              |
| <b>TILs value</b>                     |                                                                  |                                                         |                                  |
| Mean                                  | 23.4                                                             | 25.6                                                    | 25.4                             |
| SD                                    | 27.1                                                             | 26.4                                                    | 26.5                             |
| Median                                | 10.0                                                             | 15.0                                                    | 15.0                             |
| Q1-Q3                                 | 3.0 - 40.0                                                       | 5.0 - 40.0                                              | 5.0 - 40.0                       |
| Min-Max                               | 0.0 - 95.0                                                       | 0.0 - 95.0                                              | 0.0 - 95.0                       |
| <i>n</i>                              | 173                                                              | 1793                                                    | 1966                             |
| Missing                               | 0                                                                | 0                                                       | 0                                |
| <b>Histological subtype</b>           |                                                                  |                                                         |                                  |
| Ductal, <i>n</i> (%)                  | 123 ( 72.4 )                                                     | 1304 ( 76.7 )                                           | 1427 ( 76.3 )                    |
| Lobular, <i>n</i> (%)                 | 3 ( 1.8 )                                                        | 38 ( 2.2 )                                              | 41 ( 2.2 )                       |
| Medullary, <i>n</i> (%)               | 10 ( 5.9 )                                                       | 110 ( 6.5 )                                             | 120 ( 6.4 )                      |
| Tubular, <i>n</i> (%)                 | 0 ( 0 )                                                          | 3 ( 0.2 )                                               | 3 ( 0.2 )                        |
| Mucinous, <i>n</i> (%)                | 2 ( 1.2 )                                                        | 7 ( 0.4 )                                               | 9 ( 0.5 )                        |
| Other, <i>n</i> (%)                   | 28 ( 16.5 )                                                      | 204 ( 12 )                                              | 232 ( 12.4 )                     |
| Metaplastic, <i>n</i> (%)             | 9 ( 5.3 )                                                        | 53 ( 3.2 )                                              | 38 ( 2 )                         |
| Missing                               | 3                                                                | 93                                                      | 96                               |
| <b>Tumor size (cm)</b>                |                                                                  |                                                         |                                  |
| Mean                                  | 2.0                                                              | 2.2                                                     | 2.1                              |
| SD                                    | 1.8                                                              | 1.5                                                     | 1.5                              |
| Median                                | 1.8                                                              | 2.0                                                     | 2.0                              |
| Q1-Q3                                 | 0.9 - 2.8                                                        | 1.2 - 2.6                                               | 1.2 - 2.6                        |
| Min-Max                               | 0.0 - 9.4                                                        | 0.0 - 15.0                                              | 0.0 - 15.0                       |
| <i>n</i>                              | 99                                                               | 1793                                                    | 1892                             |
| Missing                               | 74                                                               | 0                                                       | 74                               |
| <b>Details on T1</b>                  |                                                                  |                                                         |                                  |
| T1mi, <i>n</i> (%)                    | 34 ( 1.9 )                                                       | 6 ( 5 )                                                 | 40 ( 2.1 )                       |
| T1a, <i>n</i> (%)                     | 114 ( 6.4 )                                                      | 10 ( 8.3 )                                              | 124 ( 6.5 )                      |
| T1b, <i>n</i> (%)                     | 218 ( 12.2 )                                                     | 14 ( 11.7 )                                             | 232 ( 12.1 )                     |
| T1c, <i>n</i> (%)                     | 707 ( 39.4 )                                                     | 29 ( 24.2 )                                             | 736 ( 38.5 )                     |
| T2, <i>n</i> (%)                      | 651 ( 36.3 )                                                     | 54 ( 45 )                                               | 705 ( 36.9 )                     |
| T3/T4, <i>n</i> (%)                   | 69 ( 3.8 )                                                       | 7 ( 5.8 )                                               | 76 ( 4 )                         |
| Missing                               | 0                                                                | 53                                                      | 53                               |
| <b>Tumor category</b>                 |                                                                  |                                                         |                                  |
| T1, <i>n</i> (%)                      | 86 ( 58.5 )                                                      | 1073 ( 59.8 )                                           | 1159 ( 59.7 )                    |
| T2, <i>n</i> (%)                      | 54 ( 36.7 )                                                      | 651 ( 36.3 )                                            | 705 ( 36.3 )                     |
| T3/T4, <i>n</i> (%)                   | 7 ( 7.1 )                                                        | 69 ( 3.8 )                                              | 76 ( 3.9 )                       |
| Missing                               | 26                                                               | 0                                                       | 26                               |

|                             | <i>Patients with at least one missing value</i><br><i>n= 173</i> | <i>Patients without missing value</i><br><i>n= 1793</i> | <i>Overall</i><br><i>n= 1966</i> |
|-----------------------------|------------------------------------------------------------------|---------------------------------------------------------|----------------------------------|
| <b>Positive lymph nodes</b> |                                                                  |                                                         |                                  |
| Mean                        | 0.8                                                              | 0.5                                                     | 0.5                              |
| SD                          | 2.5                                                              | 2.2                                                     | 2.2                              |

|                                    |              |               |               |
|------------------------------------|--------------|---------------|---------------|
| Median                             | 0.0          | 0.0           | 0.0           |
| Q1-Q3                              | 0.0 - 0.0    | 0.0 - 0.0     | 0.0 - 0.0     |
| Min-Max                            | 0.0 - 12.0   | 0.0 - 38.0    | 0.0 - 38.0    |
| <i>n</i>                           | 113          | 1793          | 1906          |
| Missing                            | 60           | 0             | 60            |
| <b>Positive lymph nodes (cat.)</b> |              |               |               |
| N0 (0), <i>n</i> (%)               | 98 ( 86.7 )  | 1553 ( 86.6 ) | 1651 ( 86.6 ) |
| N1 (1-3), <i>n</i> (%)             | 5 ( 4.4 )    | 161 ( 9 )     | 166 ( 8.7 )   |
| N2 (4-9), <i>n</i> (%)             | 6 ( 5.3 )    | 56 ( 3.1 )    | 62 ( 3.3 )    |
| N3 (10+), <i>n</i> (%)             | 4 ( 3.5 )    | 23 ( 1.3 )    | 27 ( 1.4 )    |
| Missing                            | 60           | 0             | 60            |
| <b>Histological grade</b>          |              |               |               |
| 1, <i>n</i> (%)                    | 9 ( 6.2 )    | 86 ( 4.8 )    | 95 ( 4.9 )    |
| 2, <i>n</i> (%)                    | 37 ( 25.7 )  | 436 ( 24.3 )  | 473 ( 24.4 )  |
| 3, <i>n</i> (%)                    | 98 ( 68.1 )  | 1271 ( 70.9 ) | 1369 ( 70.7 ) |
| Missing                            | 29           | 0             | 29            |
| <b>Radiotherapy</b>                |              |               |               |
| No, <i>n</i> (%)                   | 68 ( 42.2 )  | 675 ( 37.6 )  | 743 ( 38 )    |
| Yes, <i>n</i> (%)                  | 93 ( 57.8 )  | 1118 ( 62.4 ) | 1211 ( 62 )   |
| Missing                            | 12           | 0             | 12            |
| <b>Type of surgery</b>             |              |               |               |
| Partial mastectomy, <i>n</i> (%)   | 113 ( 65.7 ) | 1088 ( 60.9 ) | 1201 ( 61.3 ) |
| Complete mastectomy, <i>n</i> (%)  | 59 ( 34.3 )  | 699 ( 39.1 )  | 758 ( 38.7 )  |
| Missing                            | 1            | 6             | 7             |
| <b>Overall survival</b>            |              |               |               |
| Alive, <i>n</i> (%)                | 83 ( 48 )    | 1080 ( 60.2 ) | 1163 ( 59.2 ) |
| Dead, <i>n</i> (%)                 | 90 ( 52 )    | 713 ( 39.8 )  | 803 ( 40.8 )  |
| Missing                            | 0            | 0             | 0             |
| <b>Follow-up (years)</b>           |              |               |               |
| Median <sup>a*</sup>               | 17.6         | 18.0          | 18.0          |
| Confidence interval 95%*           | 12.7 - 25.0  | 15.3 - 20.0   | 15.3 - 20.0   |
| Min-Max                            | 0.1 - 35.0   | 0.0 - 35.2    | 0.0 - 35.2    |

\*Calculated with reverse Kaplan-Meier method.

The missingness is strongly related to survival as shown on the figure below, which displays the Kaplan-Meier survival curves for those with (*n* = 173) and without (*n* = 1793) data on all variables included in the Cox model. Missing values are highly study dependent, with some studies having more than 25% missing values while others have almost none. For this reason, multiple imputation must consider the hierarchical structure of the data.



**eFigure 3-B. Survival Among Patients With Missing Data vs Not**

Kaplan-Meier curves of the TNBC Cohort, stratified according to missingness. The figure shows the survival probability since surgery (or diagnosis) for the whole sample with no missing observation (red) and the group with missing value in at least one positive node, radiotherapy, tumor size or grade variable (blue).

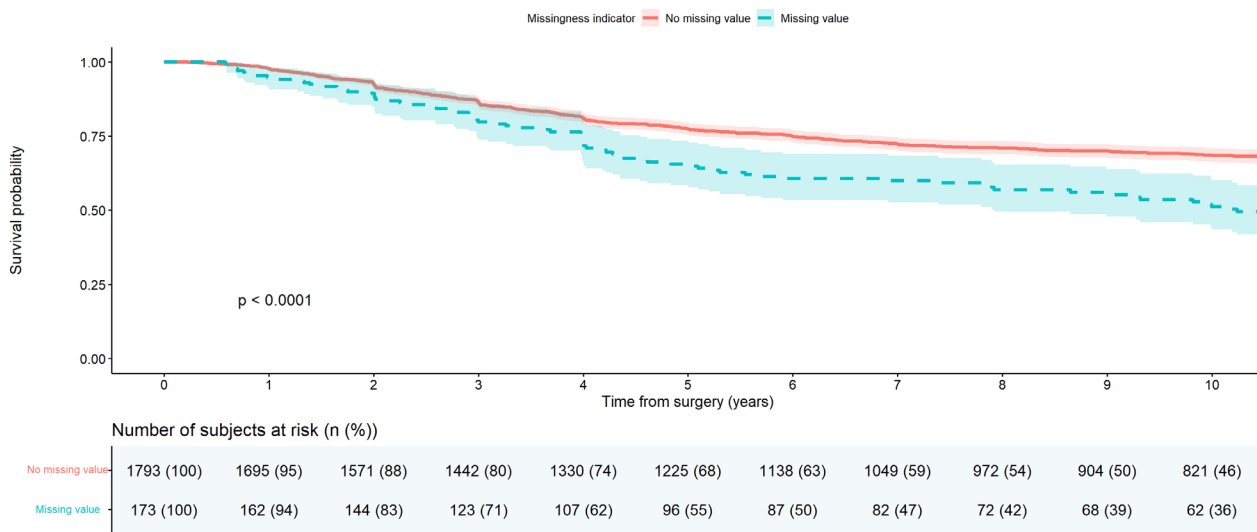

### **Imputation of missing values**

We used multi-level multiple imputation<sup>4</sup> recommended in meta-analyses of individual patient data (see also Chapter 7 in van Buuren’s book<sup>5</sup>). As we have seen before, the missingness is related to the study and we cannot ignore this characteristic. We use the *MICE* package and its add-on *miceadds* for multiple imputation.

In practice, to do multiple imputation, it is recommended in Section 5 in White et al.(2011)<sup>6</sup> to use covariates and the result of the analysis models, as well as predictors of the incomplete variable. Also, White and Royston (2009)<sup>7</sup> recommend using the Nelson-Aalen estimate of cumulative hazard (instead of time to event) and event indicator. We will therefore keep the death status as well as the Nelson-Aalen of time to death and all the covariates including tils.

Regarding the method used for multiple imputation: for continuous variable (tumor size), we chose the Gibbs sampler from Kasim and Raudenbush (1998)<sup>8</sup> which fits the situation where the within-group variance is heterogeneous, which was the case in our data. For the binary covariate (radiotherapy), we chose a multilevel imputation method for binary data based on the generalized linear mixed model presented in Jolani et al. (2015)<sup>9</sup> which is adapted to meta-analysis data. For the categorical covariate (histological grade) and the integer (number of positive lymph nodes), we chose a generic function based on a two-level predictive mean matching based on a normal linear mixed effects model<sup>10</sup>.

Additionally, we have tumor category information for almost all patients in the NKI cohort. We use this information to impute missing tumor sizes in this study by performing constrained imputation.

**eFigure 3-C.** Imputed Missing Values in the 20 Imputed Datasets (in Red): First Number Corresponds to Initial Dataset

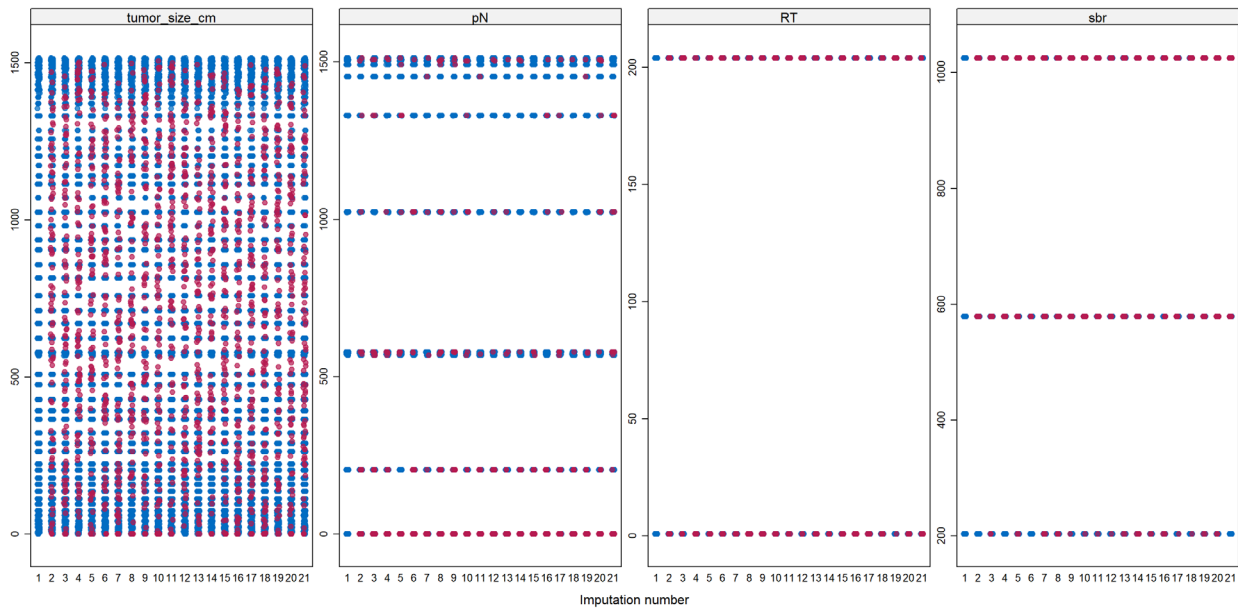

Regarding the pooling of results from the 20 imputed datasets, we will use Rubin’s rules adapted to the statistic under consideration and, if necessary, the estimates will be transformed according to the current guidelines, see references for more details: Marschall & al. (2009)<sup>11</sup> and Van Buuren (2018)<sup>12</sup>.

#### 4. Cox Models

We evaluated the effect of TILs on each of the selected endpoints described earlier (OS, DDFS, DRFS, IDFS, IBCFS and RFS). A correction for multiplicity of tests will not be applied to the results of the log-likelihood tests, since the various endpoints are similar.

TIL values are divided by 10. The hazard ratios associated with the tils can be understood as the effect of a 10% increase in the TIL value.

For each model, we test the proportional hazards assumption for a Cox regression model fit<sup>13</sup>. The test is designated “PH” in the table. A value of less than 5% indicates a non-proportionality of the covariates in the model. Significant PH tests will be investigated in the appendix.

eTable 4-A. Cox Models of Clinicopathological Variables and TILs vs Overall Survival

|                                       | <b>Model 1</b><br><i>n</i> = 1966<br><i>e</i> = 803<br><i>PH</i> <10 <sup>-2</sup> | <b>Model 2</b><br><i>n</i> = 1966<br><i>e</i> = 803<br><i>PH</i> <10 <sup>-6</sup> | <b>Model 3</b><br><i>n</i> = 1966<br><i>e</i> = 803<br><i>PH</i> <10 <sup>-6</sup> |
|---------------------------------------|------------------------------------------------------------------------------------|------------------------------------------------------------------------------------|------------------------------------------------------------------------------------|
| <b>Age at surgery</b>                 | ---                                                                                | 1.01 [ 0.99 ; 1.03 ]<br>p = 0.19                                                   | 1.01 [ 0.99 ; 1.03 ]<br>p = 0.18                                                   |
| <b>Age at surgery'</b>                | ---                                                                                | 1.03 [ 1.01 ; 1.05 ]<br>p <10 <sup>-2</sup>                                        | 1.03 [ 1.01 ; 1.05 ]<br>p = 0.01                                                   |
| <b>Number of positive lymph nodes</b> | ---                                                                                | 1.13 [ 1.10 ; 1.16 ]<br>p <10 <sup>-6</sup>                                        | 1.13 [ 1.11 ; 1.16 ]<br>p <10 <sup>-6</sup>                                        |
| <b>Tumor size</b>                     | ---                                                                                | 1.47 [ 1.22 ; 1.76 ]<br>p <10 <sup>-4</sup>                                        | 1.49 [ 1.24 ; 1.79 ]<br>p <10 <sup>-4</sup>                                        |
| <b>Tumor size'</b>                    | ---                                                                                | 0.77 [ 0.66 ; 0.91 ]<br>p <10 <sup>-2</sup>                                        | 0.76 [ 0.64 ; 0.89 ]<br>p <10 <sup>-3</sup>                                        |
| <b>Histological grade 3</b>           | ---                                                                                | 1                                                                                  | 1                                                                                  |
| <b>Histological grade 1</b>           | ---                                                                                | 0.66 [ 0.41 ; 1.08 ]<br>p = 0.10                                                   | 0.52 [ 0.32 ; 0.85 ]<br>p <10 <sup>-2</sup>                                        |
| <b>Histological grade 2</b>           | ---                                                                                | 0.98 [ 0.82 ; 1.18 ]<br>p = 0.85                                                   | 0.83 [ 0.70 ; 1.00 ]<br>p = 0.05                                                   |
| <b>Radiotherapy: no</b>               | ---                                                                                | 1                                                                                  | 1                                                                                  |
| <b>Radiotherapy: yes</b>              | 1                                                                                  | 0.93 [ 0.80 ; 1.09 ]<br>p = 0.37                                                   | 0.93 [ 0.80 ; 1.09 ]<br>p = 0.38                                                   |
| <b>Tils</b>                           | 0.88 [ 0.86 ; 0.91 ]<br>p <10 <sup>-6</sup>                                        | ---                                                                                | 0.88 [ 0.85 ; 0.91 ]<br>p <10 <sup>-6</sup>                                        |
|                                       | $\chi^2=70.16$<br>p-value <10 <sup>-6</sup> (df=1)                                 | <i>Likelihood ratio</i><br>$\chi^2=67.71$<br>p-value <10 <sup>-6</sup> (df=1)      |                                                                                    |
| <b>Considered end-point: OS</b>       |                                                                                    |                                                                                    |                                                                                    |

eTable 4-B. Cox Models of Clinicopathological Variables and TILs vs RFS

|                                       | <b>Model 1</b><br><i>n</i> = 1966<br><i>e</i> = 940<br><i>PH</i> <10 <sup>-3</sup> | <b>Model 2</b><br><i>n</i> = 1966<br><i>e</i> = 940<br><i>PH</i> <10 <sup>-6</sup> | <b>Model 3</b><br><i>n</i> = 1966<br><i>e</i> = 940<br><i>PH</i> <10 <sup>-6</sup> |
|---------------------------------------|------------------------------------------------------------------------------------|------------------------------------------------------------------------------------|------------------------------------------------------------------------------------|
| <b>Age at surgery</b>                 | ---                                                                                | 1.00 [ 0.98 ; 1.01 ]<br>p = 0.82                                                   | 1.00 [ 0.98 ; 1.01 ]<br>p = 0.83                                                   |
| <b>Age at surgery'</b>                | ---                                                                                | 1.03 [ 1.02 ; 1.05 ]<br>p <10 <sup>-3</sup>                                        | 1.03 [ 1.01 ; 1.05 ]<br>p <10 <sup>-3</sup>                                        |
| <b>Number of positive lymph nodes</b> | ---                                                                                | 1.11 [ 1.09 ; 1.13 ]<br>p <10 <sup>-6</sup>                                        | 1.11 [ 1.09 ; 1.14 ]<br>p <10 <sup>-6</sup>                                        |
| <b>Tumor size</b>                     | ---                                                                                | 1.31 [ 1.11 ; 1.55 ]<br>p <10 <sup>-2</sup>                                        | 1.32 [ 1.12 ; 1.56 ]<br>p <10 <sup>-2</sup>                                        |
| <b>Tumor size'</b>                    | ---                                                                                | 0.86 [ 0.74 ; 1.00 ]<br>p = 0.05                                                   | 0.85 [ 0.73 ; 0.99 ]<br>p = 0.03                                                   |
| <b>Histological grade 3</b>           | ---                                                                                | 1                                                                                  | 1                                                                                  |
| <b>Histological grade 1</b>           | ---                                                                                | 0.68 [ 0.44 ; 1.05 ]<br>p = 0.08                                                   | 0.55 [ 0.35 ; 0.85 ]<br>p <10 <sup>-2</sup>                                        |
| <b>Histological grade 2</b>           | ---                                                                                | 0.98 [ 0.83 ; 1.16 ]<br>p = 0.82                                                   | 0.85 [ 0.72 ; 1.00 ]<br>p = 0.05                                                   |
| <b>Radiotherapy: no</b>               | ---                                                                                | 1                                                                                  | 1                                                                                  |
| <b>Radiotherapy: yes</b>              | 1                                                                                  | 0.96 [ 0.83 ; 1.11 ]<br>p = 0.59                                                   | 0.96 [ 0.83 ; 1.11 ]<br>p = 0.62                                                   |
| <b>Tils</b>                           | 0.90 [ 0.88 ; 0.93 ]<br>p <10 <sup>-6</sup>                                        | ---                                                                                | 0.90 [ 0.87 ; 0.92 ]<br>p <10 <sup>-6</sup>                                        |
|                                       | $\chi^2=61.08$<br>p-value <10 <sup>-6</sup> (df=1)                                 | <i>Likelihood ratio</i><br>$\chi^2=61.51$<br>p-value <10 <sup>-6</sup> (df=1)      |                                                                                    |
| <b>Considered end-point: RFS</b>      |                                                                                    |                                                                                    |                                                                                    |

eTable 4-C. Cox Models of Clinicopathological Variables and TILs vs DDFS

|                                | <b>Model 1</b><br><i>n</i> = 1966<br><i>e</i> = 894<br><i>PH</i> <10 <sup>-2</sup> | <b>Model 2</b><br><i>n</i> = 1966<br><i>e</i> = 894<br><i>PH</i> <10 <sup>-6</sup> | <b>Model 3</b><br><i>n</i> = 1966<br><i>e</i> = 894<br><i>PH</i> <10 <sup>-6</sup> |
|--------------------------------|------------------------------------------------------------------------------------|------------------------------------------------------------------------------------|------------------------------------------------------------------------------------|
| Age at surgery                 | ---                                                                                | 1.02 [ 1.00 ; 1.03 ]<br>p = 0.03                                                   | 1.02 [ 1.00 ; 1.03 ]<br>p = 0.03                                                   |
| Age at surgery'                | ---                                                                                | 1.01 [ 1.00 ; 1.03 ]<br>p = 0.14                                                   | 1.01 [ 0.99 ; 1.03 ]<br>p = 0.27                                                   |
| Number of positive lymph nodes | ---                                                                                | 1.11 [ 1.08 ; 1.13 ]<br>p <10 <sup>-6</sup>                                        | 1.11 [ 1.09 ; 1.14 ]<br>p <10 <sup>-6</sup>                                        |
| Tumor size                     | ---                                                                                | 1.36 [ 1.15 ; 1.62 ]<br>p <10 <sup>-3</sup>                                        | 1.38 [ 1.16 ; 1.64 ]<br>p <10 <sup>-3</sup>                                        |
| Tumor size'                    | ---                                                                                | 0.84 [ 0.72 ; 0.98 ]<br>p = 0.03                                                   | 0.83 [ 0.71 ; 0.97 ]<br>p = 0.02                                                   |
| Histological grade 3           | ---                                                                                | 1                                                                                  | 1                                                                                  |
| Histological grade 1           | ---                                                                                | 0.74 [ 0.48 ; 1.13 ]<br>p = 0.17                                                   | 0.57 [ 0.37 ; 0.88 ]<br>p = 0.01                                                   |
| Histological grade 2           | ---                                                                                | 0.98 [ 0.82 ; 1.16 ]<br>p = 0.78                                                   | 0.82 [ 0.69 ; 0.97 ]<br>p = 0.02                                                   |
| Radiotherapy: no               | ---                                                                                | 1                                                                                  | 1                                                                                  |
| Radiotherapy: yes              | 1                                                                                  | 0.92 [ 0.79 ; 1.06 ]<br>p = 0.25                                                   | 0.92 [ 0.79 ; 1.07 ]<br>p = 0.27                                                   |
| Tils                           | 0.88 [ 0.85 ; 0.91 ]<br>p <10 <sup>-6</sup>                                        | ---                                                                                | 0.87 [ 0.85 ; 0.90 ]<br>p <10 <sup>-6</sup>                                        |
|                                |                                                                                    | <i>Likelihood ratio</i>                                                            |                                                                                    |
|                                | χ <sup>2</sup> =82.36<br>p-value <10 <sup>-6</sup> (df=1)                          |                                                                                    | χ <sup>2</sup> =83.31<br>p-value <10 <sup>-6</sup> (df=1)                          |

Considered end-point: DDFS

eTable 4-D. Cox Models of Clinicopathological Variables and TILs vs DRFS

|                                | <b>Model 1</b><br><i>n</i> = 1966<br><i>e</i> = 832<br><i>PH</i> <10 <sup>-2</sup> | <b>Model 2</b><br><i>n</i> = 1966<br><i>e</i> = 832<br><i>PH</i> <10 <sup>-6</sup> | <b>Model 3</b><br><i>n</i> = 1966<br><i>e</i> = 832<br><i>PH</i> <10 <sup>-6</sup> |
|--------------------------------|------------------------------------------------------------------------------------|------------------------------------------------------------------------------------|------------------------------------------------------------------------------------|
| Age at surgery                 | ---                                                                                | 1.01 [ 1.00 ; 1.03 ]<br>p = 0.16                                                   | 1.01 [ 1.00 ; 1.03 ]<br>p = 0.15                                                   |
| Age at surgery'                | ---                                                                                | 1.02 [ 1.00 ; 1.04 ]<br>p = 0.02                                                   | 1.02 [ 1.00 ; 1.04 ]<br>p = 0.05                                                   |
| Number of positive lymph nodes | ---                                                                                | 1.12 [ 1.09 ; 1.14 ]<br>p <10 <sup>-6</sup>                                        | 1.12 [ 1.10 ; 1.15 ]<br>p <10 <sup>-6</sup>                                        |
| Tumor size                     | ---                                                                                | 1.45 [ 1.21 ; 1.74 ]<br>p <10 <sup>-4</sup>                                        | 1.47 [ 1.22 ; 1.76 ]<br>p <10 <sup>-4</sup>                                        |
| Tumor size'                    | ---                                                                                | 0.80 [ 0.68 ; 0.94 ]<br>p <10 <sup>-2</sup>                                        | 0.79 [ 0.67 ; 0.93 ]<br>p <10 <sup>-2</sup>                                        |
| Histological grade 3           | ---                                                                                | 1                                                                                  | 1                                                                                  |
| Histological grade 1           | ---                                                                                | 0.64 [ 0.39 ; 1.03 ]<br>p = 0.07                                                   | 0.49 [ 0.30 ; 0.80 ]<br>p <10 <sup>-2</sup>                                        |
| Histological grade 2           | ---                                                                                | 0.98 [ 0.83 ; 1.17 ]<br>p = 0.86                                                   | 0.83 [ 0.69 ; 0.99 ]<br>p = 0.04                                                   |
| Radiotherapy: no               | ---                                                                                | 1                                                                                  | 1                                                                                  |
| Radiotherapy: yes              | 1                                                                                  | 0.93 [ 0.80 ; 1.08 ]<br>p = 0.36                                                   | 0.93 [ 0.80 ; 1.09 ]<br>p = 0.37                                                   |
| Tils                           | 0.88 [ 0.85 ; 0.90 ]<br>p <10 <sup>-6</sup>                                        | ---                                                                                | 0.87 [ 0.84 ; 0.90 ]<br>p <10 <sup>-6</sup>                                        |
|                                |                                                                                    | <i>Likelihood ratio</i>                                                            |                                                                                    |
|                                | χ <sup>2</sup> =80.64<br>p-value <10 <sup>-6</sup> (df=1)                          |                                                                                    | χ <sup>2</sup> =80.82<br>p-value <10 <sup>-6</sup> (df=1)                          |

Considered end-point: DRFS

eTable 4-E. Cox Models Including Clinicopathological Variables and TILs on IBCFS

|                                       | <b>Model 1</b><br><i>n</i> = 1966<br><i>e</i> = 1036<br><i>PH</i> <10 <sup>-3</sup> | <b>Model 2</b><br><i>n</i> = 1966<br><i>e</i> = 1036<br><i>PH</i> <10 <sup>-6</sup> | <b>Model 3</b><br><i>n</i> = 1966<br><i>e</i> = 1036<br><i>PH</i> <10 <sup>-6</sup> |
|---------------------------------------|-------------------------------------------------------------------------------------|-------------------------------------------------------------------------------------|-------------------------------------------------------------------------------------|
| <b>Age at surgery</b>                 | ---                                                                                 | 0.99 [ 0.97 ; 1.00 ]<br>p = 0.03                                                    | 0.99 [ 0.97 ; 1.00 ]<br>p = 0.04                                                    |
| <b>Age at surgery'</b>                | ---                                                                                 | 1.04 [ 1.03 ; 1.06 ]<br>p <10 <sup>-6</sup>                                         | 1.04 [ 1.02 ; 1.06 ]<br>p <10 <sup>-5</sup>                                         |
| <b>Number of positive lymph nodes</b> | ---                                                                                 | 1.11 [ 1.09 ; 1.13 ]<br>p <10 <sup>-6</sup>                                         | 1.11 [ 1.09 ; 1.13 ]<br>p <10 <sup>-6</sup>                                         |
| <b>Tumor size</b>                     | ---                                                                                 | 1.22 [ 1.05 ; 1.43 ]<br>p = 0.01                                                    | 1.22 [ 1.05 ; 1.43 ]<br>p = 0.01                                                    |
| <b>Tumor size'</b>                    | ---                                                                                 | 0.91 [ 0.79 ; 1.05 ]<br>p = 0.19                                                    | 0.91 [ 0.79 ; 1.05 ]<br>p = 0.18                                                    |
| <b>Histological grade 3</b>           | ---                                                                                 | 1                                                                                   | 1                                                                                   |
| <b>Histological grade 1</b>           | ---                                                                                 | 0.62 [ 0.40 ; 0.95 ]<br>p = 0.03                                                    | 0.52 [ 0.33 ; 0.80 ]<br>p <10 <sup>-2</sup>                                         |
| <b>Histological grade 2</b>           | ---                                                                                 | 1.01 [ 0.86 ; 1.18 ]<br>p = 0.92                                                    | 0.90 [ 0.76 ; 1.05 ]<br>p = 0.18                                                    |
| <b>Radiotherapy: no</b>               | ---                                                                                 | 1                                                                                   | 1                                                                                   |
| <b>Radiotherapy: yes</b>              | 1                                                                                   | 0.96 [ 0.83 ; 1.10 ]<br>p = 0.54                                                    | 0.96 [ 0.83 ; 1.10 ]<br>p = 0.54                                                    |
| <b>Tils</b>                           | 0.92 [ 0.90 ; 0.94 ]<br>p <10 <sup>-6</sup>                                         | ---                                                                                 | 0.92 [ 0.89 ; 0.94 ]<br>p <10 <sup>-6</sup>                                         |
|                                       | $\chi^2=43.77$<br>p-value <10 <sup>-6</sup> (df=1)                                  | <i>Likelihood ratio</i><br>$\chi^2=42.78$<br>p-value <10 <sup>-6</sup> (df=1)       |                                                                                     |

Considered end-point: IBCFS

eTable 4-F. Cox Models of Clinicopathological Variables and TILs vs IDFS

|                                       | <b>Model 1</b><br><i>n</i> = 1966<br><i>e</i> = 1074<br><i>PH</i> <10 <sup>-3</sup> | <b>Model 2</b><br><i>n</i> = 1966<br><i>e</i> = 1074<br><i>PH</i> <10 <sup>-6</sup> | <b>Model 3</b><br><i>n</i> = 1966<br><i>e</i> = 1074<br><i>PH</i> <10 <sup>-6</sup> |
|---------------------------------------|-------------------------------------------------------------------------------------|-------------------------------------------------------------------------------------|-------------------------------------------------------------------------------------|
| <b>Age at surgery</b>                 | ---                                                                                 | 0.99 [ 0.98 ; 1.00 ]<br>p = 0.17                                                    | 0.99 [ 0.98 ; 1.00 ]<br>p = 0.20                                                    |
| <b>Age at surgery'</b>                | ---                                                                                 | 1.04 [ 1.02 ; 1.05 ]<br>p <10 <sup>-4</sup>                                         | 1.03 [ 1.02 ; 1.05 ]<br>p <10 <sup>-4</sup>                                         |
| <b>Number of positive lymph nodes</b> | ---                                                                                 | 1.10 [ 1.08 ; 1.12 ]<br>p <10 <sup>-6</sup>                                         | 1.10 [ 1.08 ; 1.13 ]<br>p <10 <sup>-6</sup>                                         |
| <b>Tumor size</b>                     | ---                                                                                 | 1.19 [ 1.02 ; 1.39 ]<br>p = 0.02                                                    | 1.19 [ 1.02 ; 1.39 ]<br>p = 0.02                                                    |
| <b>Tumor size'</b>                    | ---                                                                                 | 0.93 [ 0.82 ; 1.07 ]<br>p = 0.33                                                    | 0.93 [ 0.81 ; 1.07 ]<br>p = 0.32                                                    |
| <b>Histological grade 3</b>           | ---                                                                                 | 1                                                                                   | 1                                                                                   |
| <b>Histological grade 1</b>           | ---                                                                                 | 0.68 [ 0.46 ; 1.03 ]<br>p = 0.07                                                    | 0.57 [ 0.38 ; 0.86 ]<br>p <10 <sup>-2</sup>                                         |
| <b>Histological grade 2</b>           | ---                                                                                 | 1.00 [ 0.86 ; 1.17 ]<br>p = 0.99                                                    | 0.89 [ 0.76 ; 1.04 ]<br>p = 0.14                                                    |
| <b>Radiotherapy: no</b>               | ---                                                                                 | 1                                                                                   | 1                                                                                   |
| <b>Radiotherapy: yes</b>              | 1                                                                                   | 0.96 [ 0.84 ; 1.10 ]<br>p = 0.60                                                    | 0.97 [ 0.85 ; 1.11 ]<br>p = 0.64                                                    |
| <b>Tils</b>                           | 0.92 [ 0.90 ; 0.94 ]<br>p <10 <sup>-6</sup>                                         | ---                                                                                 | 0.92 [ 0.89 ; 0.94 ]<br>p <10 <sup>-6</sup>                                         |
|                                       | $\chi^2=45.74$<br>p-value <10 <sup>-6</sup> (df=1)                                  | <i>Likelihood ratio</i><br>$\chi^2=45.16$<br>p-value <10 <sup>-6</sup> (df=1)       |                                                                                     |

Considered end-point: IDFS

## 5. Detailed Clinical Outcomes According to Various TIL Thresholds and According to Stage

eTable 5-A. Clinical Outcomes According to TIL Thresholds in the Overall Study Population, According to Age and Stage

|                                         |       | Estimated survival with 95% bootstrapped confidence interval |              |                 |                |                 |                |                 |                |                |                |                |
|-----------------------------------------|-------|--------------------------------------------------------------|--------------|-----------------|----------------|-----------------|----------------|-----------------|----------------|----------------|----------------|----------------|
|                                         |       | IDFS                                                         |              | RFS             |                | DDFS            |                | DRFS            |                | OS             |                |                |
|                                         | TILs  | N (%)                                                        | 5-year       | 10-year         | 5-year         | 10-year         | 5-year         | 10-year         | 5-year         | 10-year        | 5-year         | 10-year        |
| <b>All patients<br/>(N=1966)</b>        | 0-100 | 1966 (100%)                                                  | 65% [63-67]  | 54% [52-56]     | 69% [67-71]    | 60% [58-62]     | 71% [70-73]    | 62% [60-64]     | 73% [71-75]    | 65% [63-67]    | 76% [75-78]    | 67% [65-69]    |
|                                         | <30   | 1300 (66%)                                                   | 60% [58-63]  | 49% [47-52]     | 63% [61-66]    | 54% [52-57]     | 66% [64-68]    | 55% [53-58]     | 68% [66-70]    | 59% [57-61]    | 72% [69-74]    | 62% [59-64]    |
|                                         | ≥30   | 666 (34%)                                                    | 74% [71-77]  | 63% [60-66]     | 79% [77-82]    | 71% [68-74]     | 81% [79-84]    | 75% [72-78]     | 84% [81-86]    | 77% [74-80]    | 86% [84-88]    | 78% [75-80]    |
|                                         | ≥50   | 417 (21%)                                                    | 78% [74-81]  | 67% [62-71]     | 83% [80-86]    | 75% [71-78]     | 86% [83-89]    | 81% [77-84]     | 88% [85-90]    | 82% [79-85]    | 90% [88-93]    | 82% [79-86]    |
|                                         | ≥75   | 168 (9%)                                                     | 84% [79-89]  | 73% [67-79]     | 90% [86-93]    | 81% [76-86]     | 92% [88-95]    | 89% [85-93]     | 94% [91-97]    | 90% [86-94]    | 96% [93-98]    | 90% [86-94]    |
| <b>Age &lt;50<br/>(n=800)</b>           | 0-100 | 800 (100%)                                                   | 65% [63-68]  | 57% [54-60]     | 70% [67-73]    | 65% [62-68]     | 74% [71-76]    | 69% [66-71]     | 75% [73-77]    | 71% [69-74]    | 79% [77-82]    | 74% [71-76]    |
|                                         | <30   | 467 (58%)                                                    | 58% [54-62]  | 51% [47-55]     | 62% [58-66]    | 57% [53-61]     | 65% [61-68]    | 58% [54-62]     | 67% [63-70]    | 62% [58-66]    | 72% [68-76]    | 66% [62-69]    |
|                                         | ≥30   | 333 (42%)                                                    | 76% [72-80]  | 66% [62-70]     | 82% [79-86]    | 77% [73-81]     | 86% [83-89]    | 83% [80-86]     | 87% [84-90]    | 84% [81-88]    | 89% [86-92]    | 84% [81-88]    |
|                                         | ≥50   | 249 (31%)                                                    | 79% [75-83]  | 68% [63-73]     | 86% [82-89]    | 79% [75-83]     | 89% [86-92]    | 87% [83-90]     | 91% [88-94]    | 88% [84-91]    | 93% [90-96]    | 88% [84-91]    |
|                                         | ≥75   | 119 (15%)                                                    | 86% [80-91]  | 72% [65-79]     | 91% [87-95]    | 82% [76-88]     | 95% [92-98]    | 93% [90-97]     | 96% [92-98]    | 94% [91-97]    | 97% [94-100]   | 94% [90-97]    |
| <b>Age ≥50<br/>(n=1166)</b>             | 0-100 | 1166 (100%)                                                  | 64% [62-67]  | 51% [48-53]     | 68% [65-70]    | 55% [53-58]     | 69% [67-72]    | 56% [53-59]     | 72% [69-74]    | 60% [57-62]    | 74% [72-77]    | 61% [59-64]    |
|                                         | <30   | 833 (71%)                                                    | 62% [58-65]  | 48% [44-51]     | 64% [62-67]    | 52% [49-56]     | 66% [64-69]    | 53% [50-56]     | 69% [66-71]    | 57% [53-60]    | 71% [69-74]    | 58% [55-61]    |
|                                         | ≥30   | 333 (29%)                                                    | 72% [68-77]  | 59% [54-64]     | 76% [72-80]    | 64% [59-69]     | 77% [72-81]    | 64% [59-69]     | 80% [76-84]    | 67% [62-72]    | 83% [79-86]    | 69% [64-74]    |
|                                         | ≥50   | 168 (14%)                                                    | 75% [69-81]  | 63% [57-71]     | 79% [73-84]    | 66% [59-73]     | 80% [75-86]    | 68% [61-75]     | 83% [78-88]    | 71% [64-77]    | 86% [81-90]    | 72% [65-78]    |
|                                         | ≥75   | 49 (4%)                                                      | 81% [71-89]  | 78% [67-89]     | 87% [79-94]    | 80% [69-89]     | 83% [74-91]    | 77% [65-87]     | 89% [82-96]    | 78% [67-89]    | 91% [84-98]    | 78% [66-88]    |
| <b>pN0<br/>(n=1711)<sup>1</sup></b>     | 0-100 | 1711 (100%)                                                  | 69% [67-71]  | 58% [56-60]     | 73% [71-75]    | 64% [62-66]     | 76% [74-77]    | 67% [65-69]     | 78% [76-79]    | 70% [68-72]    | 81% [79-83]    | 72% [70-74]    |
|                                         | <30   | 1123 (66%)                                                   | 65% [62-67]  | 53% [51-56]     | 68% [66-71]    | 59% [56-61]     | 71% [69-73]    | 61% [58-63]     | 73% [70-75]    | 64% [62-67]    | 77% [75-79]    | 67% [64-69]    |
|                                         | ≥30   | 588 (34%)                                                    | 77% [74-80]  | 66% [63-69]     | 82% [80-85]    | 75% [72-78]     | 84% [82-87]    | 78% [76-81]     | 87% [84-89]    | 81% [78-84]    | 89% [87-91]    | 82% [79-85]    |
|                                         | ≥50   | 377 (22%)                                                    | 80% [77-84]  | 70% [66-74]     | 86% [83-89]    | 78% [74-82]     | 89% [86-91]    | 84% [80-87]     | 91% [88-93]    | 85% [82-88]    | 93% [91-95]    | 86% [82-89]    |
|                                         | ≥75   | 161 (9%)                                                     | 85% [81-90]  | 74% [68-80]     | 91% [87-95]    | 83% [78-88]     | 93% [90-96]    | 91% [87-94]     | 96% [92-98]    | 92% [88-95]    | 97% [94-99]    | 92% [88-95]    |
| <b>Stage I<br/>(n=1081)<sup>1</sup></b> | 0-100 | 1081 (100%)                                                  | 73% [70-75]  | 61% [59-64]     | 77% [75-79]    | 68% [65-70]     | 79% [77-81]    | 71% [69-73]     | 82% [80-83]    | 74% [72-76]    | 85% [83-87]    | 76% [74-79]    |
|                                         | <30   | 727 (67%)                                                    | 69% [66-72]  | 58% [55-61]     | 73% [70-76]    | 64% [61-67]     | 76% [73-78]    | 66% [63-69]     | 78% [75-80]    | 70% [67-73]    | 82% [79-84]    | 72% [69-75]    |
|                                         | ≥30   | 354 (33%)                                                    | 80% [76-83]  | 68% [63-72]     | 85% [82-88]    | 76% [72-80]     | 87% [84-90]    | 81% [77-84]     | 90% [87-92]    | 83% [80-87]    | 91% [88-94]    | 84% [81-88]    |
|                                         | ≥50   | 227 (21%)                                                    | 84% [80-88]  | 70% [64-75]     | 89% [86-93]    | 78% [73-83]     | 91% [88-94]    | 86% [82-90]     | 94% [91-96]    | 88% [84-91]    | 95% [92-97]    | 89% [85-92]    |
|                                         | ≥75   | 109 (10%)                                                    | 86% [80-92]  | 73% [65-80]     | 91% [87-95]    | 80% [74-87]     | 92% [88-96]    | 90% [85-95]     | 95% [92-98]    | 92% [88-96]    | 96% [93-99]    | 92% [88-96]    |
| <b>pT1mi N0<br/>(n= 38)<sup>1</sup></b> | 0-100 | 38 (100%)                                                    | 86% [76-95]  | 76% [64-88]     | 92% [84-97]    | 85% [74-95]     | 92% [84-97]    | 88% [78-97]     | 95% [89-100]   | 91% [81-97]    | 97% [92-100]   | 90% [80-100]   |
|                                         | <30   | 24 (63%)                                                     | 83% [69-96]  | 72% [54-87]     | 92% [79-100]   | 86% [73-96]     | 88% [75-96]    | 82% [67-96]     | 92% [83-100]   | 86% [72-96]    | 96% [88-100]   | 85% [71-100]   |
|                                         | ≥30   | 14 (37%)                                                     | 92% [77-100] | 83% [63-100]    | 92% [78-100]   | 83% [63-100]    | 100% [100-100] | 100% [100-100]  | 100% [100-100] | 100% [100-100] | 100% [100-100] | 100% [100-100] |
|                                         | ≥50   | 9 (24%)                                                      | 88% [67-100] | 70% [40-100]    | 88% [67-100]   | 70% [40-100]    | 100% [100-100] | 100% [100-100]  | 100% [100-100] | 100% [100-100] | 100% [100-100] | 100% [100-100] |
|                                         | ≥75   | 0                                                            | NA           | NA              | NA             | NA              | NA             | NA              | NA             | NA             | NA             | NA             |
| <b>pT1a N0<br/>(n= 118)<sup>1</sup></b> | 0-100 | 119 (100%)                                                   | 85% [79-91]  | 68% [58-77]     | 92% [87-96]    | 79% [71-87]     | 90% [85-95]    | 79% [70-87]     | 95% [92-98]    | 86% [79-92]    | 98% [96-100]   | 89% [83-95]    |
|                                         | <30   | 73 (61%)                                                     | 84% [75-91]  | 69% [57-80]     | 92% [85-97]    | 77% [67-88]     | 89% [81-95]    | 80% [69-89]     | 94% [88-98]    | 86% [77-94]    | 98% [95-100]   | 88% [81-96]    |
|                                         | ≥30   | 46 (39%)                                                     | 87% [79-95]  | 67% [52-82]     | 92% [84-98]    | 84% [71-94]     | 92% [85-98]    | 76% [61-89]     | 97% [92-100]   | 86% [76-97]    | 97% [92-100]   | 91% [81-98]    |
|                                         | ≥50   | 30 (25%)                                                     | 87% [76-96]  | 74% [56-91]     | 92% [83-100]   | 85% [67-96]     | 91% [81-100]   | 80% [60-96]     | 96% [88-100]   | 89% [73-100]   | 96% [88-100]   | 96% [88-100]   |
|                                         | ≥75   | 12 (10%)                                                     | 91% [73-100] | NA <sup>2</sup> | 100% [100-100] | NA <sup>2</sup> | 91% [75-100]   | NA <sup>2</sup> | 100% [100-100] | 100% [100-100] | 100% [100-100] | 100% [100-100] |

|                                         |       |            | IDFS        |             | RFS          |             | DDFS         |              | DRFS         |              | OS           |              |
|-----------------------------------------|-------|------------|-------------|-------------|--------------|-------------|--------------|--------------|--------------|--------------|--------------|--------------|
|                                         | TILs  | N (%)      | 5-year      | 10-year     | 5-year       | 10-year     | 5-year       | 10-year      | 5-year       | 10-year      | 5-year       | 10-year      |
| <b>pT1b N0<br/>(n= 222)<sup>1</sup></b> | 0-100 | 222 (100%) | 74% [69-79] | 59% [53-65] | 80% [75-84]  | 68% [62-74] | 84% [80-88]  | 72% [67-78]  | 86% [82-90]  | 77% [72-83]  | 90% [87-94]  | 79% [74-84]  |
|                                         | <30   | 154 (69%)  | 71% [65-77] | 54% [46-61] | 76% [70-82]  | 64% [57-71] | 81% [75-86]  | 66% [58-73]  | 83% [77-88]  | 72% [66-79]  | 88% [83-93]  | 75% [68-81]  |
|                                         | ≥30   | 68 (31%)   | 81% [72-89] | 70% [59-80] | 89% [81-95]  | 78% [67-87] | 92% [85-97]  | 87% [78-94]  | 93% [88-98]  | 89% [81-95]  | 95% [90-99]  | 88% [81-95]  |
|                                         | ≥50   | 37 (17%)   | 82% [71-92] | 68% [53-82] | 94% [88-100] | 76% [62-89] | 94% [86-100] | 87% [76-97]  | 97% [91-100] | 90% [80-100] | 97% [91-100] | 90% [80-97]  |
|                                         | ≥75   | 18 (8%)    | 76% [59-94] | 71% [50-88] | 88% [75-100] | 76% [59-93] | 88% [75-100] | 88% [75-100] | 94% [82-100] | 94% [83-100] | 94% [83-100] | 94% [83-100] |
| <b>pT1c N0<br/>(n= 702)<sup>1</sup></b> | 0-100 | 702 (100%) | 69% [67-72] | 60% [56-63] | 73% [70-76]  | 65% [62-68] | 76% [73-78]  | 68% [65-71]  | 77% [75-80]  | 70% [67-73]  | 80% [78-83]  | 73% [70-76]  |
|                                         | <30   | 476 (68%)  | 66% [62-69] | 57% [53-61] | 69% [65-72]  | 61% [57-65] | 72% [68-75]  | 64% [60-68]  | 73% [70-76]  | 66% [62-69]  | 77% [73-80]  | 69% [65-72]  |
|                                         | ≥30   | 226 (32%)  | 77% [72-82] | 66% [61-71] | 82% [78-86]  | 73% [68-78] | 84% [80-88]  | 78% [73-82]  | 87% [83-90]  | 80% [75-84]  | 88% [85-92]  | 81% [77-86]  |
|                                         | ≥50   | 151 (22%)  | 83% [78-88] | 70% [64-76] | 88% [84-92]  | 78% [72-83] | 90% [86-94]  | 85% [80-90]  | 92% [89-96]  | 87% [82-91]  | 94% [90-97]  | 87% [82-91]  |
|                                         | ≥75   | 79 (11%)   | 87% [81-94] | 71% [62-79] | 91% [86-96]  | 79% [71-87] | 94% [88-97]  | 91% [86-96]  | 95% [91-99]  | 91% [86-96]  | 96% [92-99]  | 91% [85-96]  |
| <b>Stage II<br/>(n=779)<sup>1</sup></b> | 0-100 | 779 (100%) | 62% [59-64] | 50% [47-53] | 65% [62-68]  | 56% [53-60] | 67% [64-70]  | 57% [54-60]  | 69% [66-72]  | 60% [57-63]  | 73% [70-76]  | 62% [59-65]  |
|                                         | <30   | 499 (64%)  | 55% [51-59] | 43% [39-47] | 58% [54-61]  | 48% [44-52] | 61% [57-64]  | 47% [44-51]  | 62% [59-66]  | 52% [48-55]  | 66% [63-70]  | 54% [50-58]  |
|                                         | ≥30   | 280 (36%)  | 73% [68-77] | 62% [57-68] | 78% [73-82]  | 71% [67-76] | 79% [75-84]  | 73% [69-78]  | 81% [77-85]  | 75% [70-79]  | 84% [81-88]  | 75% [71-80]  |
|                                         | ≥50   | 172 (22%)  | 74% [68-80] | 67% [61-73] | 79% [74-84]  | 76% [71-81] | 84% [79-88]  | 79% [74-84]  | 85% [81-90]  | 80% [75-85]  | 89% [85-93]  | 80% [74-85]  |
|                                         | ≥75   | 55 (7%)    | 86% [78-93] | 79% [70-87] | 91% [83-96]  | 89% [82-96] | 95% [89-100] | 92% [86-98]  | 96% [92-100] | 92% [86-98]  | 98% [95-100] | 92% [85-98]  |

**eFigure 5-A. Overall Survival According to TILs <30% vs ≥30%**

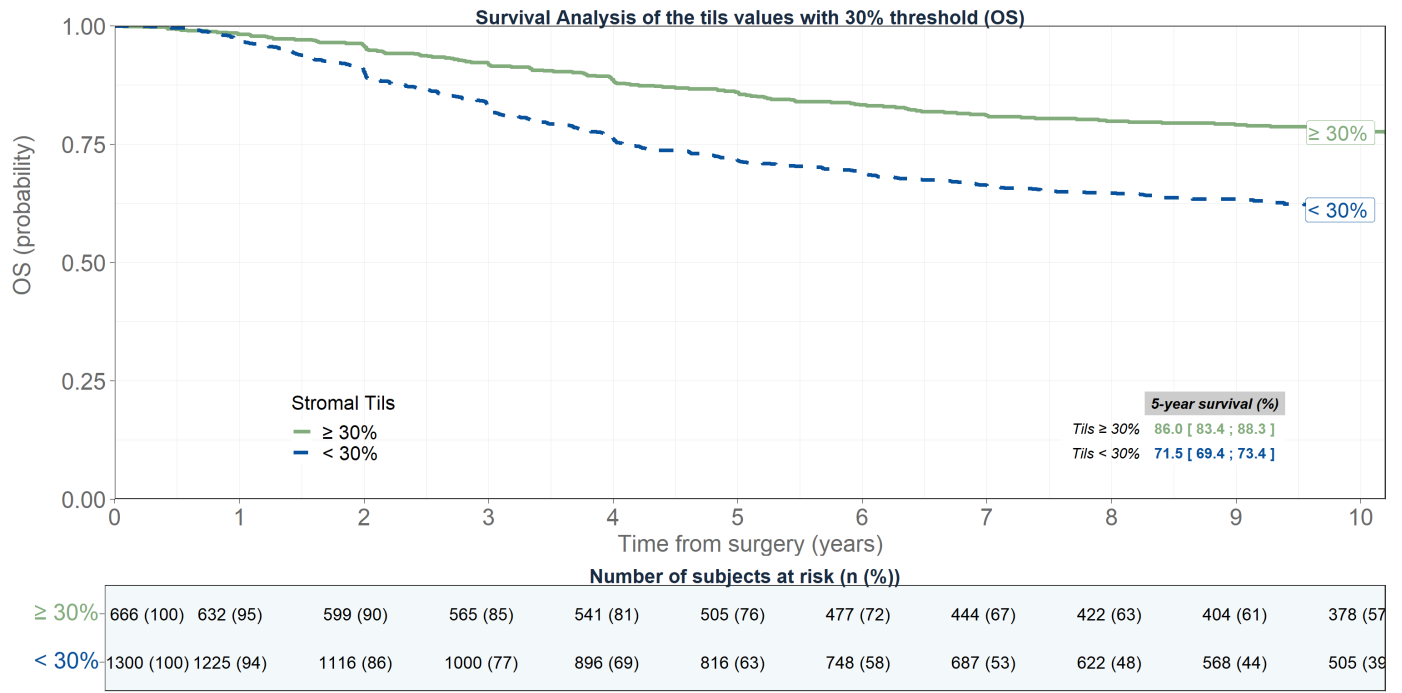

**eFigure 5-B. RFS According to TILs <30% vs ≥30%**

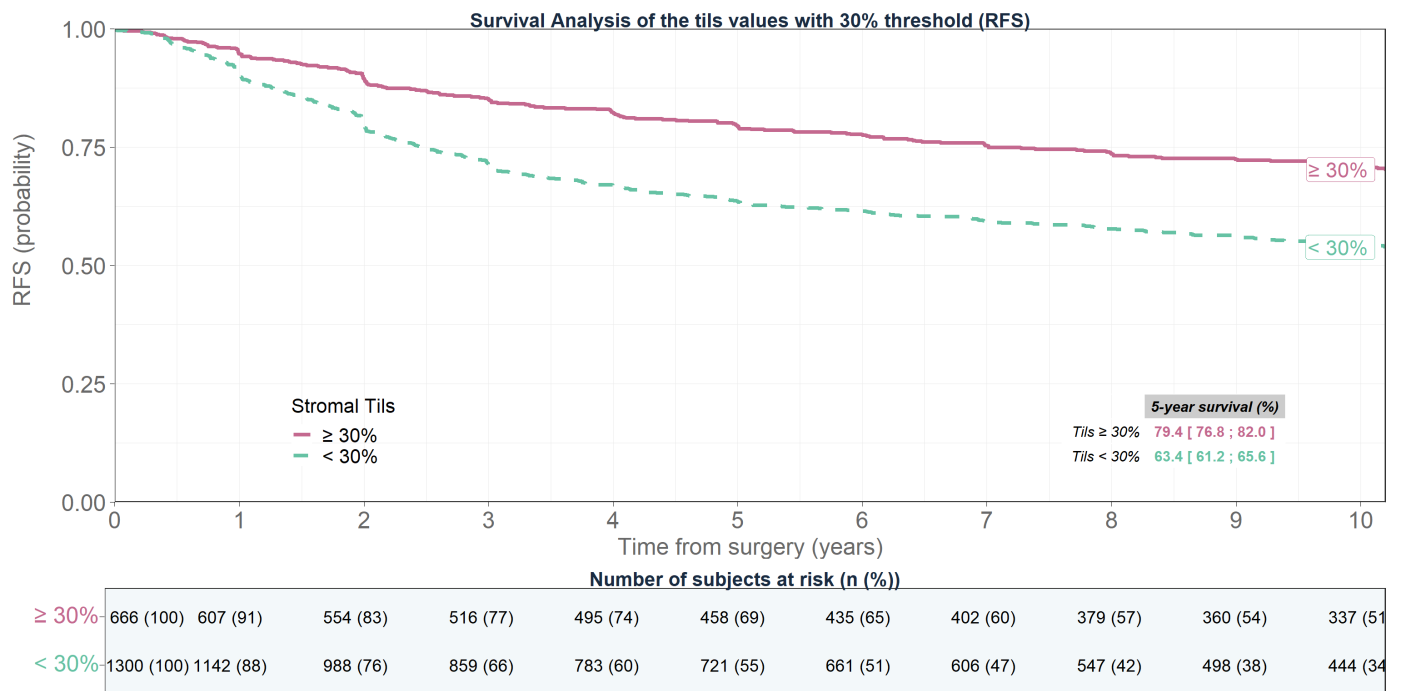



**eFigure 5-C. DDFS According to TILs <30% vs ≥30%**

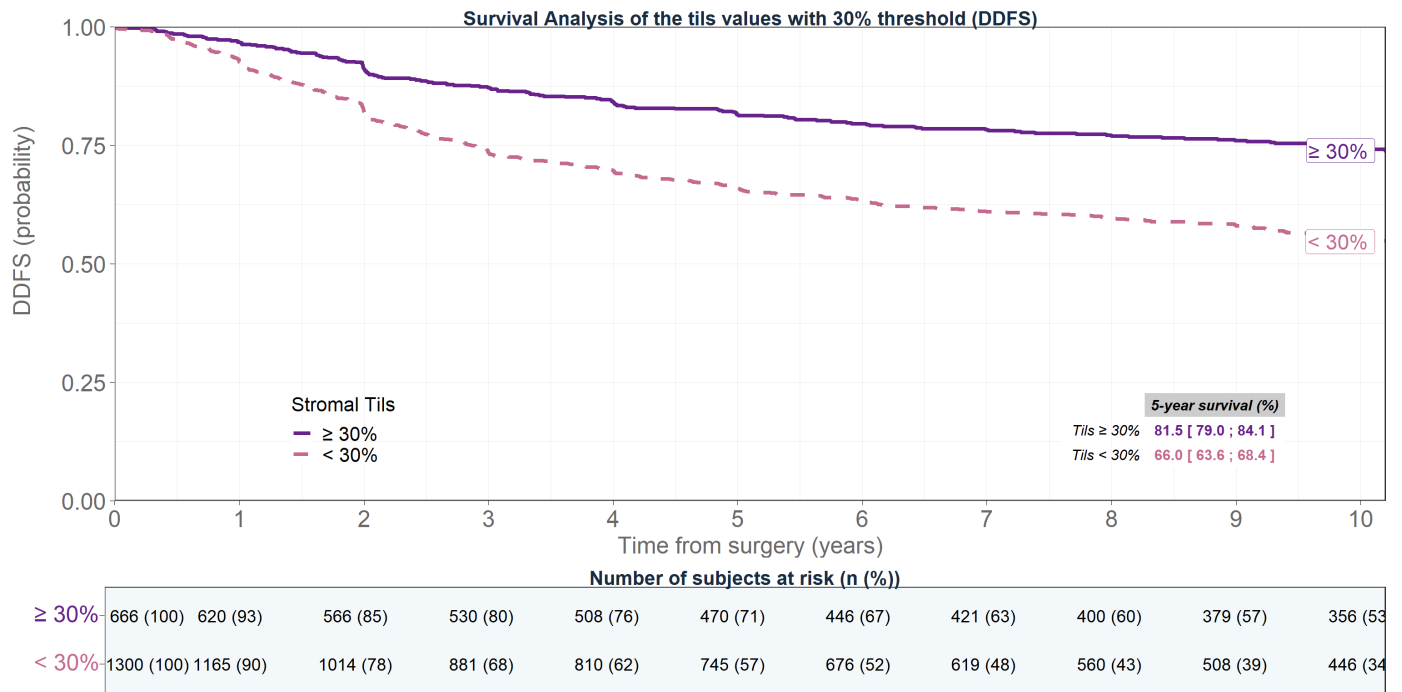

**eFigure 5-D. DRFS According to TILs <30% vs ≥30%**

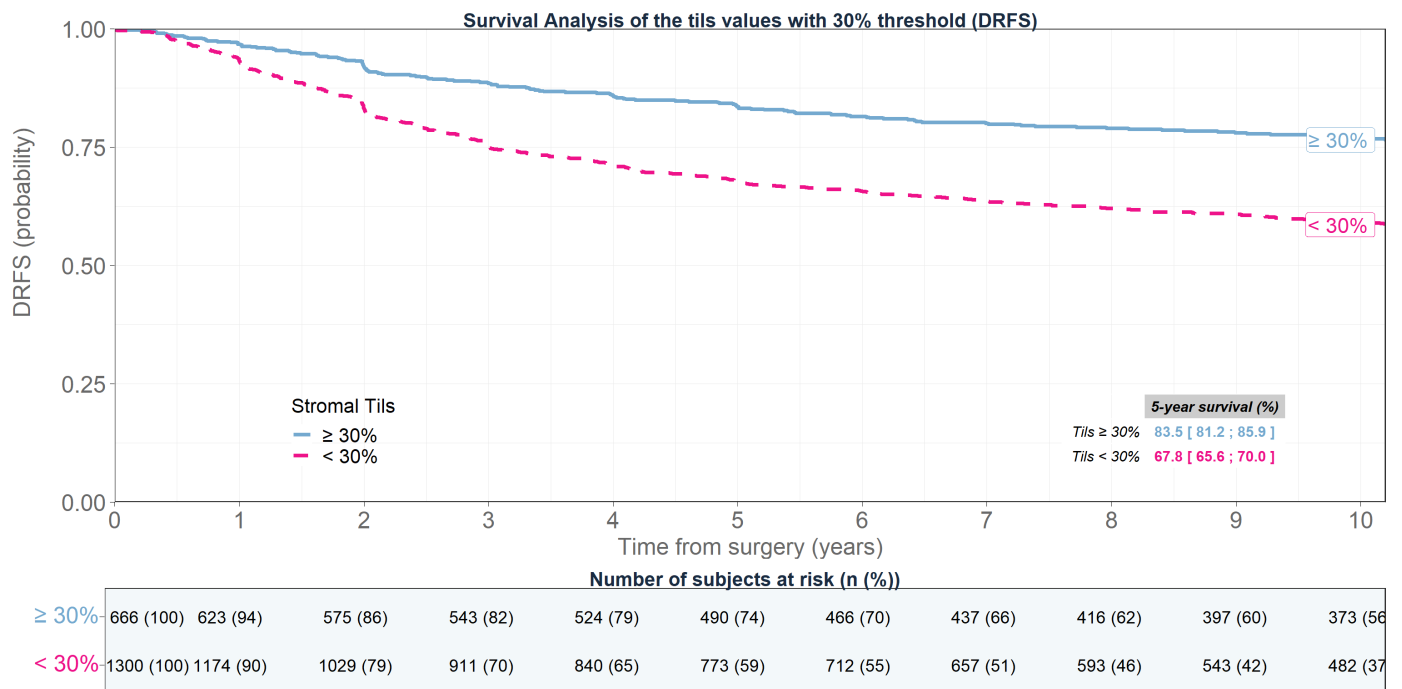

**eFigure 5-E. IBCFS According to TILs <30% vs ≥30%**

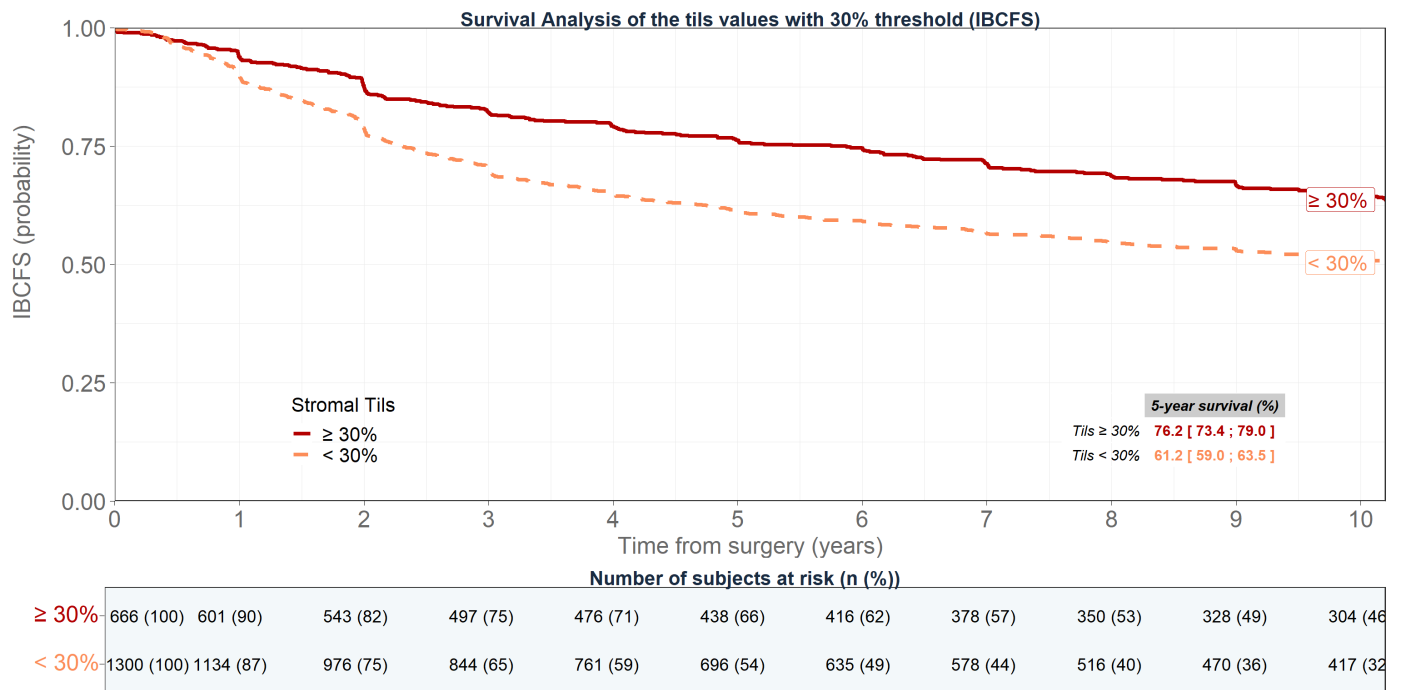

**eFigure 5-F. IDFS According to TILs <30% vs ≥30%**

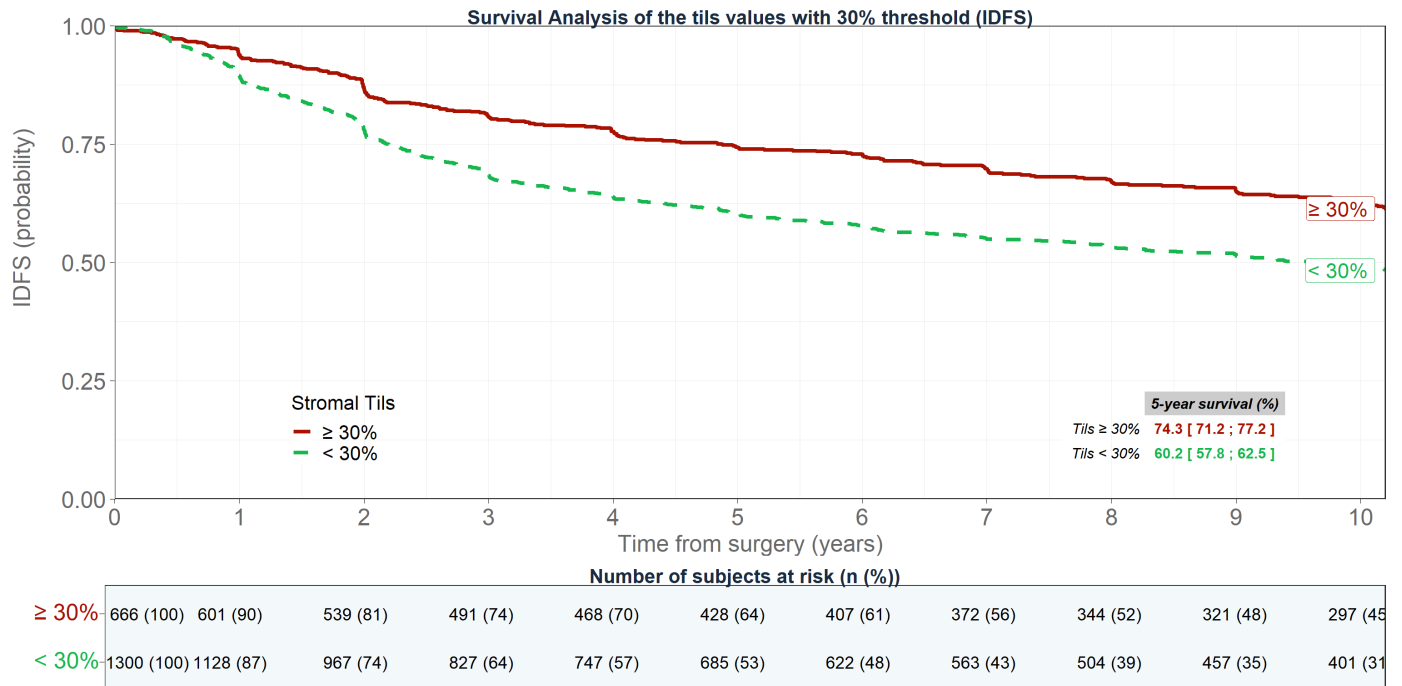

**eFigure 5-G. Overall Survival According to TILs <75% vs ≥75%**

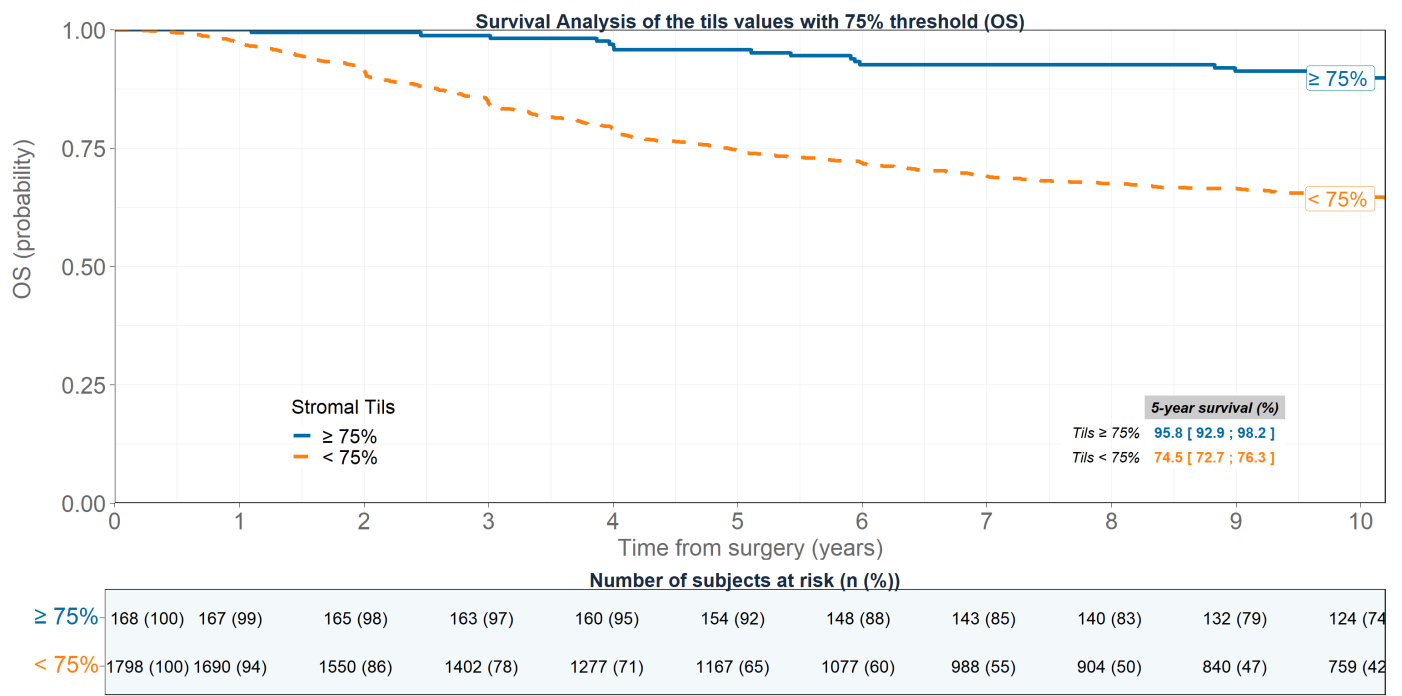

**eFigure 5-H. RFS According to TILs <75% vs ≥75%**

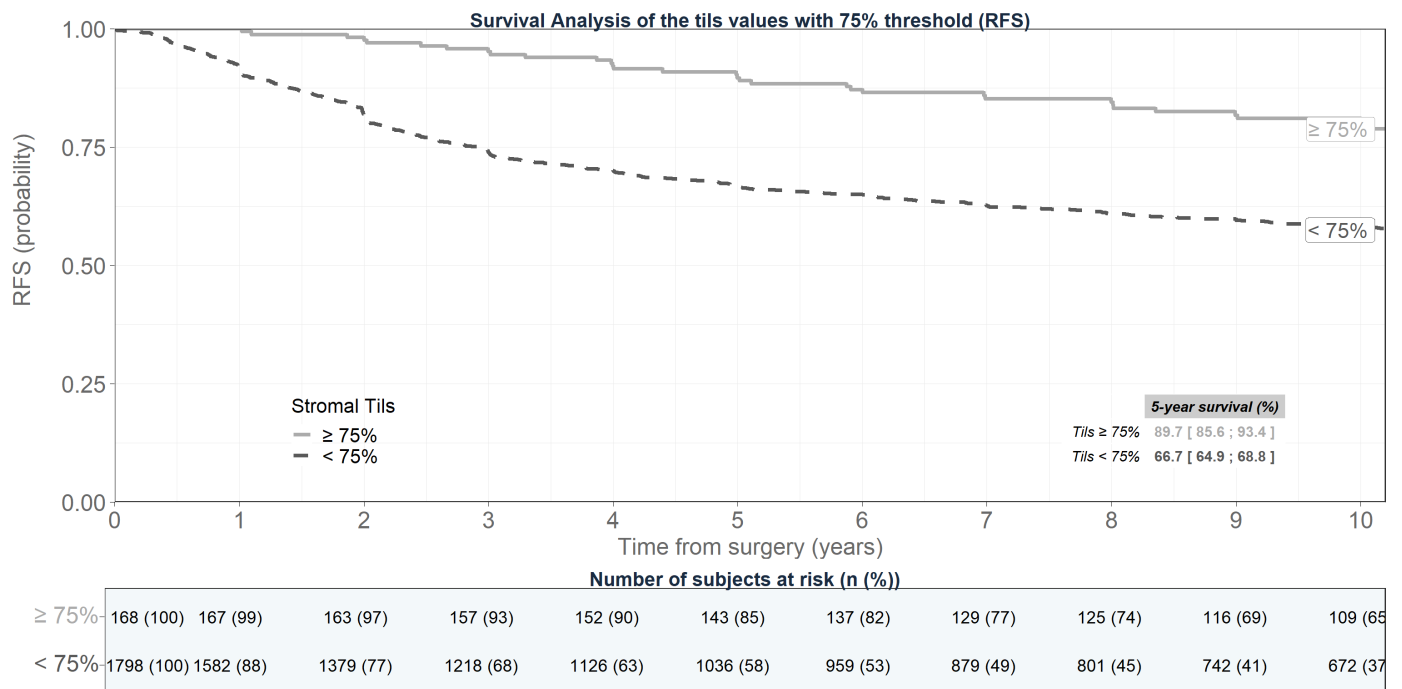

**eFigure 5-I. DDFS According to TILs <75% vs ≥75%**

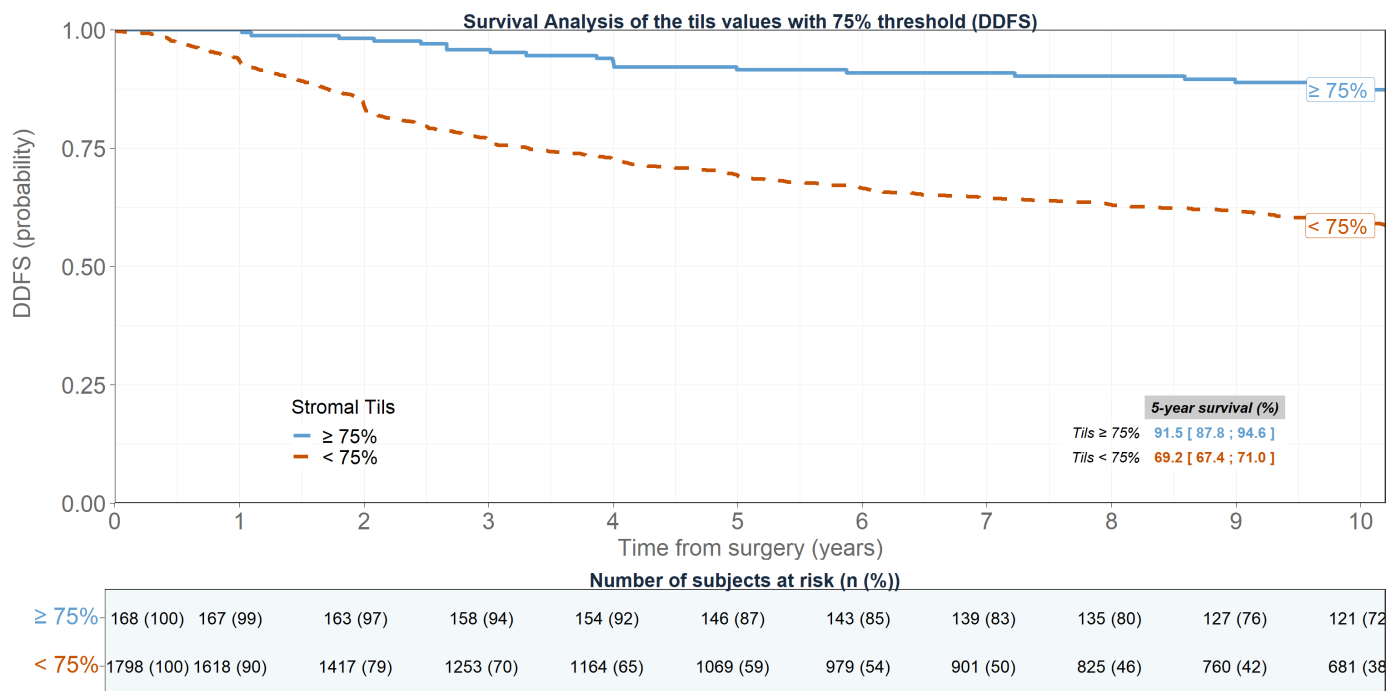

**eFigure 5-J. DRFS According to TILs <75% vs ≥75%**

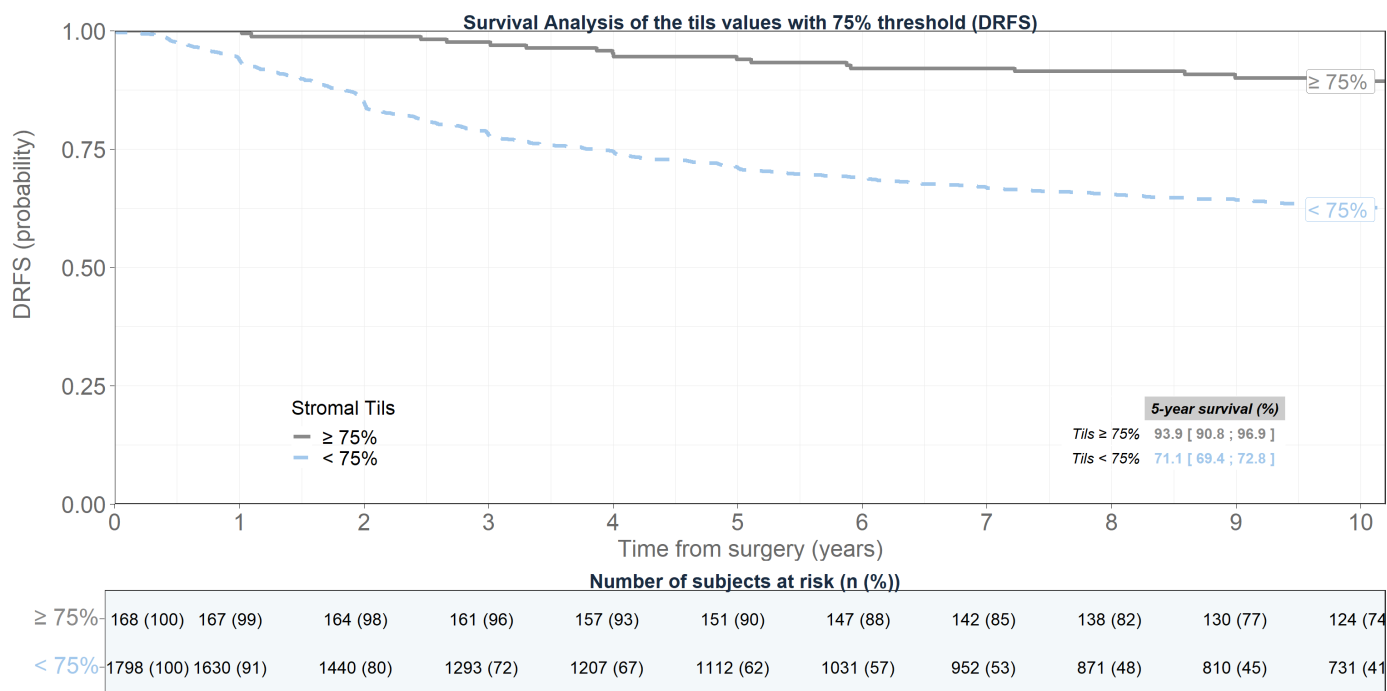

**eFigure 5-K. IBCFS According to TILs <75% vs ≥75%**

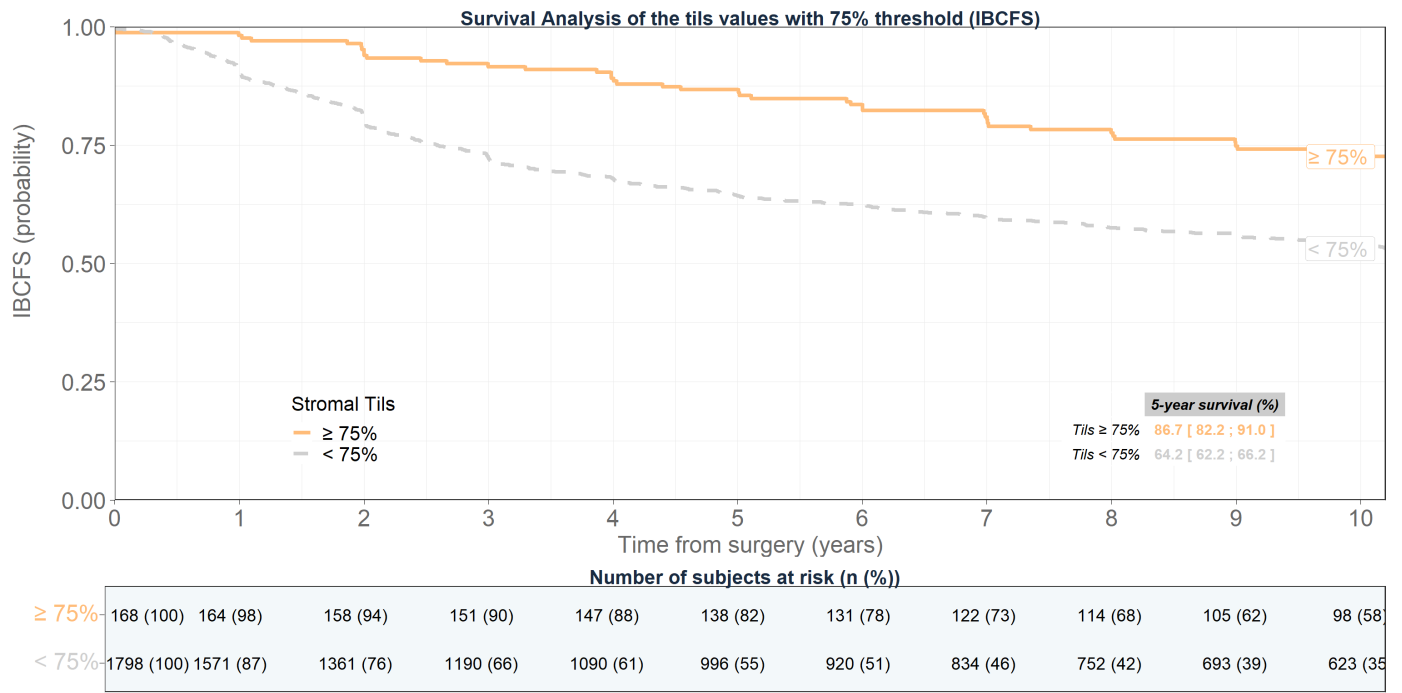

**eFigure 5-L. IDFS According to TILs <75% vs ≥75%**

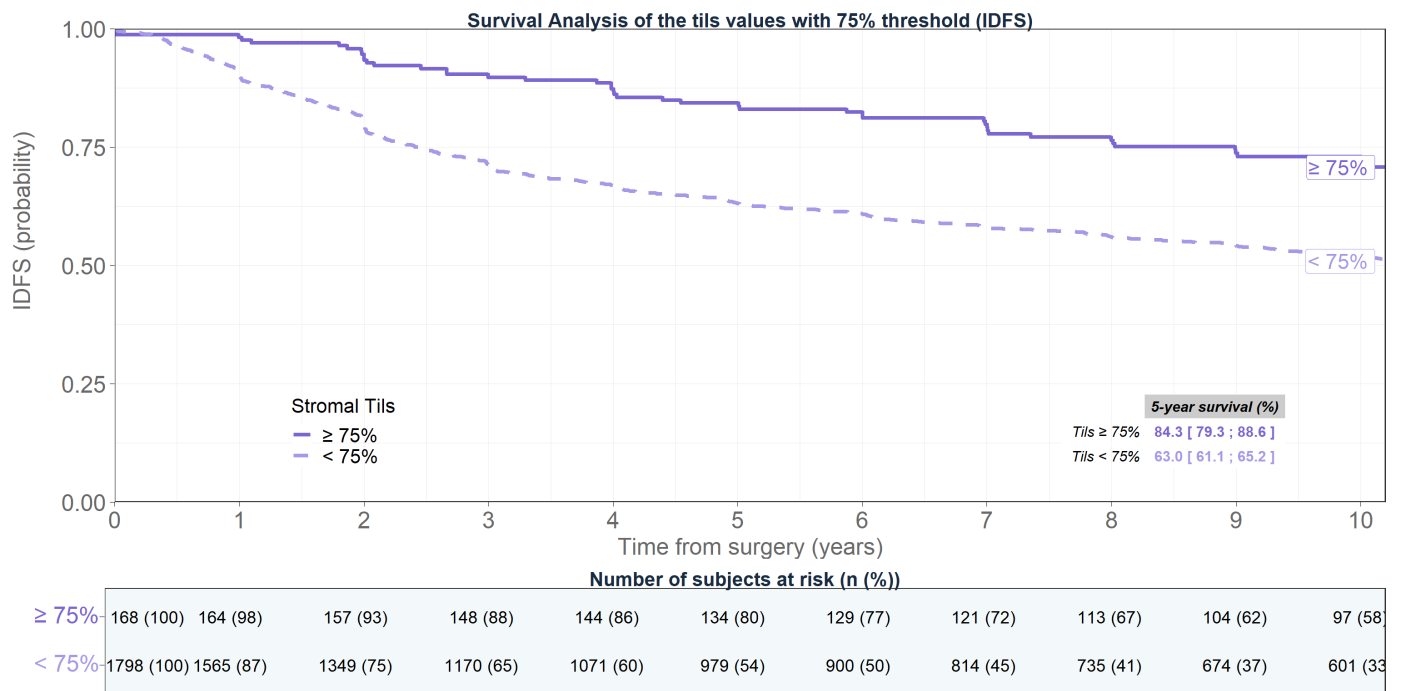

**eFigure 5-M. Overall Survival According to Nodal Status and TILs <30 vs ≥30%**

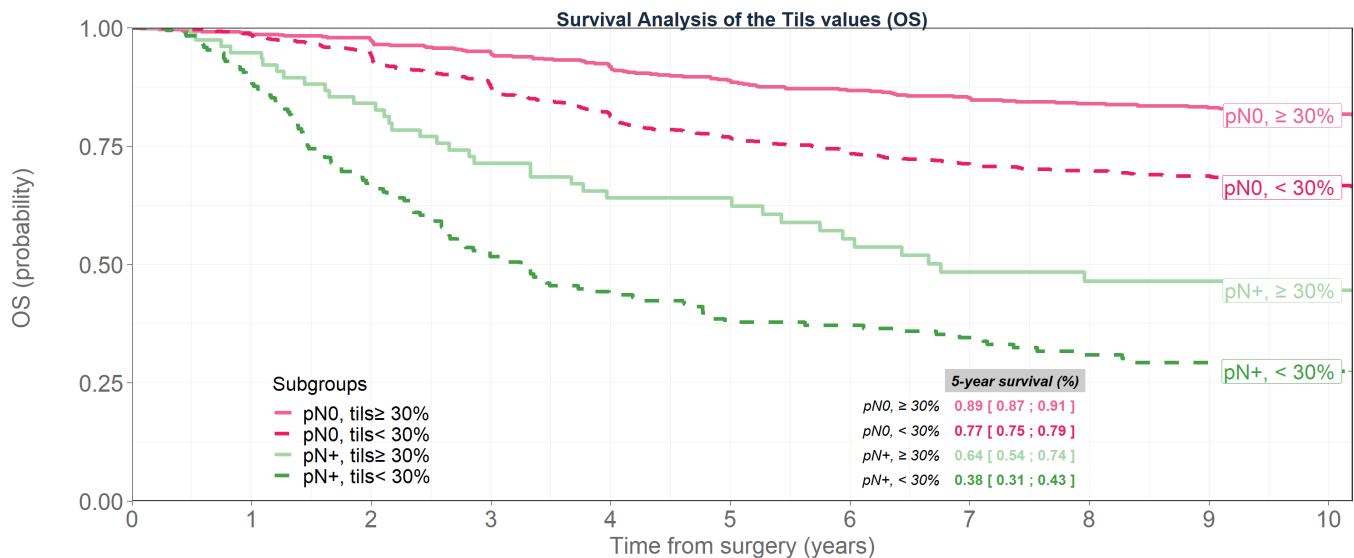

|                 | Number of subjects at risk (n (%)) |           |           |          |          |          |          |          |          |          |          |  |
|-----------------|------------------------------------|-----------|-----------|----------|----------|----------|----------|----------|----------|----------|----------|--|
|                 | 0                                  | 1         | 2         | 3        | 4        | 5        | 6        | 7        | 8        | 9        | 10       |  |
| pN0, tils ≥ 30% | 588 (100)                          | 561 (95)  | 539 (92)  | 515 (88) | 498 (85) | 467 (79) | 445 (76) | 417 (71) | 397 (68) | 380 (65) | 361 (61) |  |
| pN0, tils < 30% | 1122 (100)                         | 1075 (96) | 1009 (90) | 917 (82) | 827 (74) | 758 (68) | 691 (62) | 636 (57) | 583 (52) | 532 (47) | 476 (42) |  |
| pN+, tils ≥ 30% | 78 (100)                           | 71 (91)   | 60 (77)   | 50 (64)  | 43 (55)  | 38 (49)  | 32 (41)  | 27 (35)  | 25 (32)  | 24 (31)  | 17 (22)  |  |
| pN+, tils < 30% | 178 (100)                          | 150 (84)  | 107 (60)  | 83 (47)  | 69 (39)  | 58 (33)  | 57 (32)  | 51 (29)  | 39 (22)  | 36 (20)  | 29 (16)  |  |

**eFigure 5-N. RFS According to Nodal Status and TILs <30 vs ≥30%**

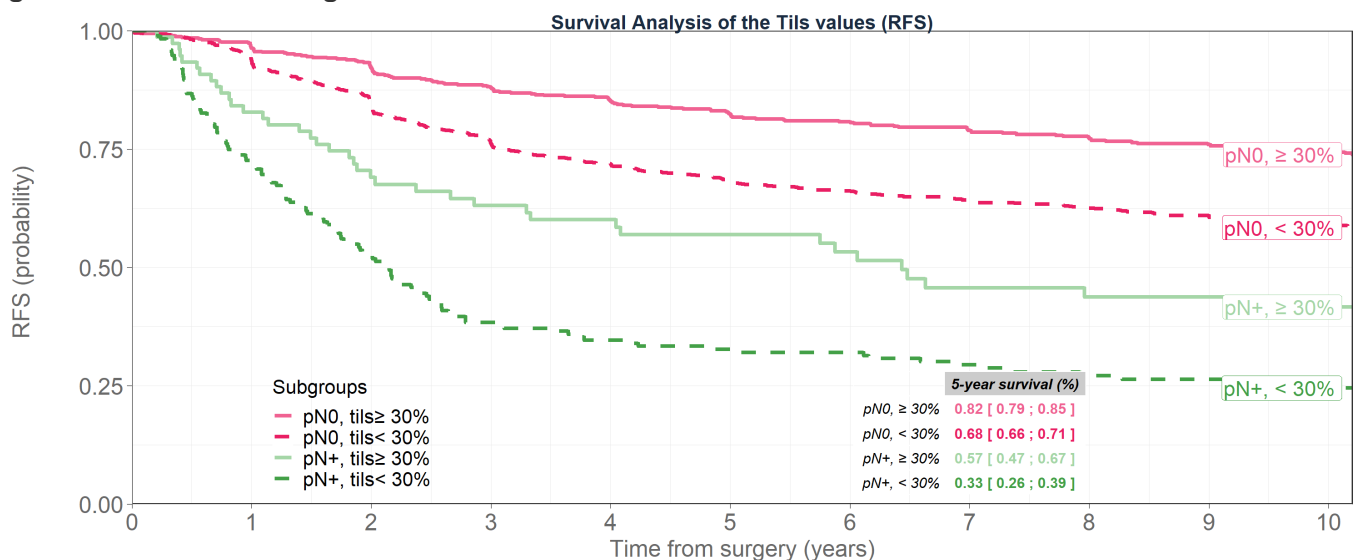

|                 | Number of subjects at risk (n (%)) |           |          |          |          |          |          |          |          |          |          |  |
|-----------------|------------------------------------|-----------|----------|----------|----------|----------|----------|----------|----------|----------|----------|--|
|                 | 0                                  | 1         | 2        | 3        | 4        | 5        | 6        | 7        | 8        | 9        | 10       |  |
| pN0, tils ≥ 30% | 588 (100)                          | 546 (93)  | 507 (86) | 474 (81) | 457 (78) | 426 (72) | 406 (69) | 378 (64) | 357 (61) | 339 (58) | 322 (55) |  |
| pN0, tils < 30% | 1122 (100)                         | 1020 (91) | 902 (80) | 797 (71) | 728 (65) | 671 (60) | 612 (55) | 563 (50) | 513 (46) | 466 (42) | 417 (37) |  |
| pN+, tils ≥ 30% | 78 (100)                           | 61 (78)   | 47 (60)  | 42 (54)  | 38 (49)  | 32 (41)  | 29 (37)  | 24 (31)  | 22 (28)  | 21 (27)  | 15 (19)  |  |
| pN+, tils < 30% | 178 (100)                          | 122 (69)  | 86 (48)  | 62 (35)  | 55 (31)  | 50 (28)  | 49 (28)  | 43 (24)  | 34 (19)  | 32 (18)  | 27 (15)  |  |

**eFigure 5-O. DDFS According to Nodal Status and TILs <30 vs ≥30%**

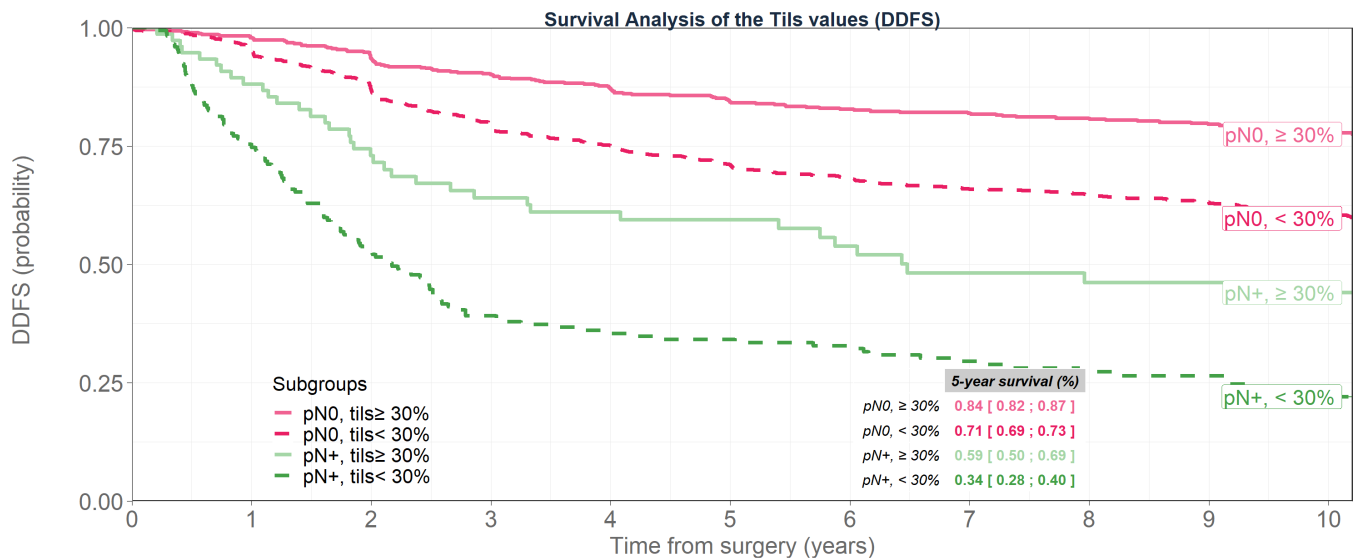

|                 | Number of subjects at risk (n (%)) |           |          |          |          |          |          |          |          |          |          |  |
|-----------------|------------------------------------|-----------|----------|----------|----------|----------|----------|----------|----------|----------|----------|--|
|                 | 0                                  | 1         | 2        | 3        | 4        | 5        | 6        | 7        | 8        | 9        | 10       |  |
| pN0, tils ≥ 30% | 588 (100)                          | 555 (94)  | 516 (88) | 488 (83) | 470 (80) | 437 (74) | 417 (71) | 396 (67) | 377 (64) | 357 (61) | 340 (58) |  |
| pN0, tils < 30% | 1122 (100)                         | 1039 (93) | 928 (83) | 818 (73) | 754 (67) | 693 (62) | 627 (56) | 576 (51) | 526 (47) | 476 (42) | 421 (38) |  |
| pN+, tils ≥ 30% | 78 (100)                           | 65 (83)   | 50 (64)  | 42 (54)  | 38 (49)  | 33 (42)  | 29 (37)  | 25 (32)  | 23 (29)  | 22 (28)  | 16 (21)  |  |
| pN+, tils < 30% | 178 (100)                          | 126 (71)  | 86 (48)  | 63 (35)  | 56 (31)  | 52 (29)  | 49 (28)  | 43 (24)  | 34 (19)  | 32 (18)  | 25 (14)  |  |

**eFigure 5-P. DRFS According to Nodal Status and TILs <30 vs ≥30%**

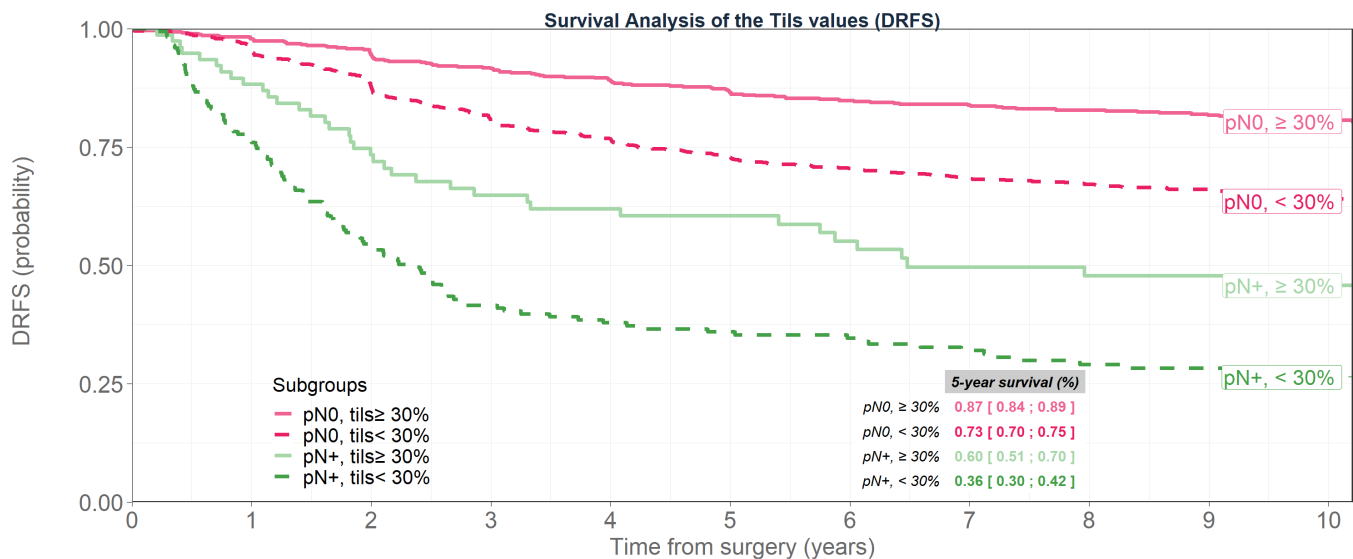

|                 | Number of subjects at risk (n (%)) |           |          |          |          |          |          |          |          |          |          |  |
|-----------------|------------------------------------|-----------|----------|----------|----------|----------|----------|----------|----------|----------|----------|--|
|                 | 0                                  | 1         | 2        | 3        | 4        | 5        | 6        | 7        | 8        | 9        | 10       |  |
| pN0, tils ≥ 30% | 588 (100)                          | 557 (95)  | 523 (89) | 498 (85) | 483 (82) | 455 (77) | 435 (74) | 410 (70) | 391 (66) | 373 (63) | 356 (61) |  |
| pN0, tils < 30% | 1122 (100)                         | 1046 (93) | 940 (84) | 844 (75) | 780 (70) | 718 (64) | 659 (59) | 610 (54) | 557 (50) | 509 (45) | 454 (40) |  |
| pN+, tils ≥ 30% | 78 (100)                           | 66 (85)   | 52 (67)  | 45 (58)  | 41 (53)  | 35 (45)  | 31 (40)  | 27 (35)  | 25 (32)  | 24 (31)  | 17 (22)  |  |
| pN+, tils < 30% | 178 (100)                          | 128 (72)  | 89 (50)  | 67 (38)  | 60 (34)  | 55 (31)  | 53 (30)  | 47 (26)  | 36 (20)  | 34 (19)  | 28 (16)  |  |

**eFigure 5-Q. IBCFS According to Nodal Status and TILs <30 vs ≥30%**

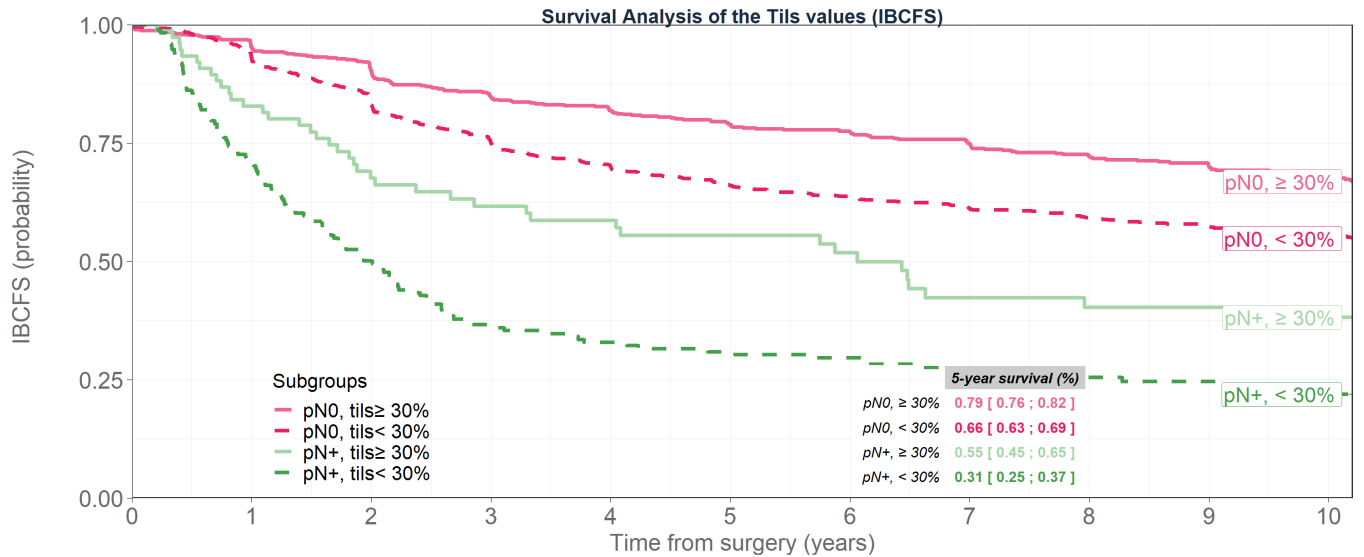

|                 | Number of subjects at risk (n (%)) |           |          |          |          |          |          |          |          |          |          |  |
|-----------------|------------------------------------|-----------|----------|----------|----------|----------|----------|----------|----------|----------|----------|--|
|                 | 0                                  | 1         | 2        | 3        | 4        | 5        | 6        | 7        | 8        | 9        | 10       |  |
| pN0, tils ≥ 30% | 588 (100)                          | 540 (92)  | 497 (85) | 456 (78) | 439 (75) | 407 (69) | 388 (66) | 356 (61) | 330 (56) | 309 (53) | 290 (49) |  |
| pN0, tils < 30% | 1122 (100)                         | 1014 (90) | 894 (80) | 785 (70) | 709 (63) | 649 (58) | 590 (53) | 539 (48) | 484 (43) | 440 (39) | 393 (35) |  |
| pN+, tils ≥ 30% | 78 (100)                           | 61 (78)   | 46 (59)  | 41 (53)  | 37 (47)  | 31 (40)  | 28 (36)  | 22 (28)  | 20 (26)  | 19 (24)  | 14 (18)  |  |
| pN+, tils < 30% | 178 (100)                          | 120 (67)  | 82 (46)  | 59 (33)  | 52 (29)  | 47 (26)  | 45 (25)  | 39 (22)  | 32 (18)  | 30 (17)  | 24 (13)  |  |

**eFigure 5-R. IDFS According to Nodal Status and TILs <30 vs ≥30%**

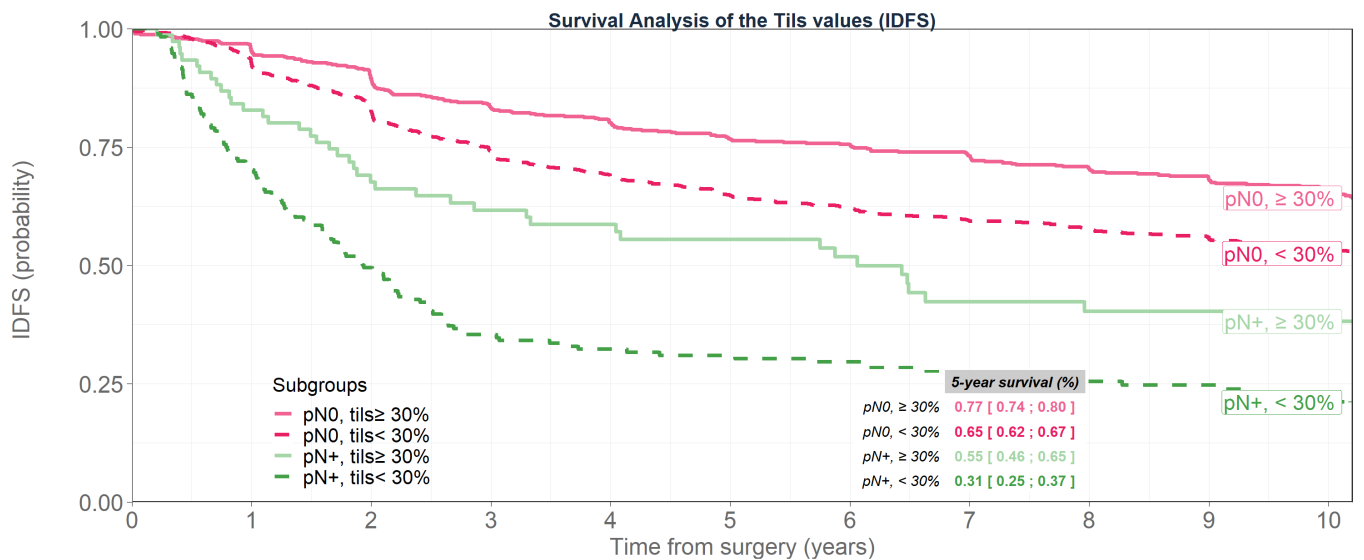

|                 | Number of subjects at risk (n (%)) |           |          |          |          |          |          |          |          |          |          |  |
|-----------------|------------------------------------|-----------|----------|----------|----------|----------|----------|----------|----------|----------|----------|--|
|                 | 0                                  | 1         | 2        | 3        | 4        | 5        | 6        | 7        | 8        | 9        | 10       |  |
| pN0, tils ≥ 30% | 588 (100)                          | 540 (92)  | 493 (84) | 450 (77) | 431 (73) | 397 (68) | 379 (64) | 350 (60) | 324 (55) | 302 (51) | 283 (48) |  |
| pN0, tils < 30% | 1122 (100)                         | 1009 (90) | 886 (79) | 770 (69) | 696 (62) | 638 (57) | 577 (51) | 524 (47) | 472 (42) | 427 (38) | 377 (34) |  |
| pN+, tils ≥ 30% | 78 (100)                           | 61 (78)   | 46 (59)  | 41 (53)  | 37 (47)  | 31 (40)  | 28 (36)  | 22 (28)  | 20 (26)  | 19 (24)  | 14 (18)  |  |
| pN+, tils < 30% | 178 (100)                          | 119 (67)  | 81 (46)  | 57 (32)  | 51 (29)  | 47 (26)  | 45 (25)  | 39 (22)  | 32 (18)  | 30 (17)  | 24 (13)  |  |



**eFigure 5-S. Overall Survival According to T1 Substage Among Patients With Stage I TNBC (Regardless of TILs)**

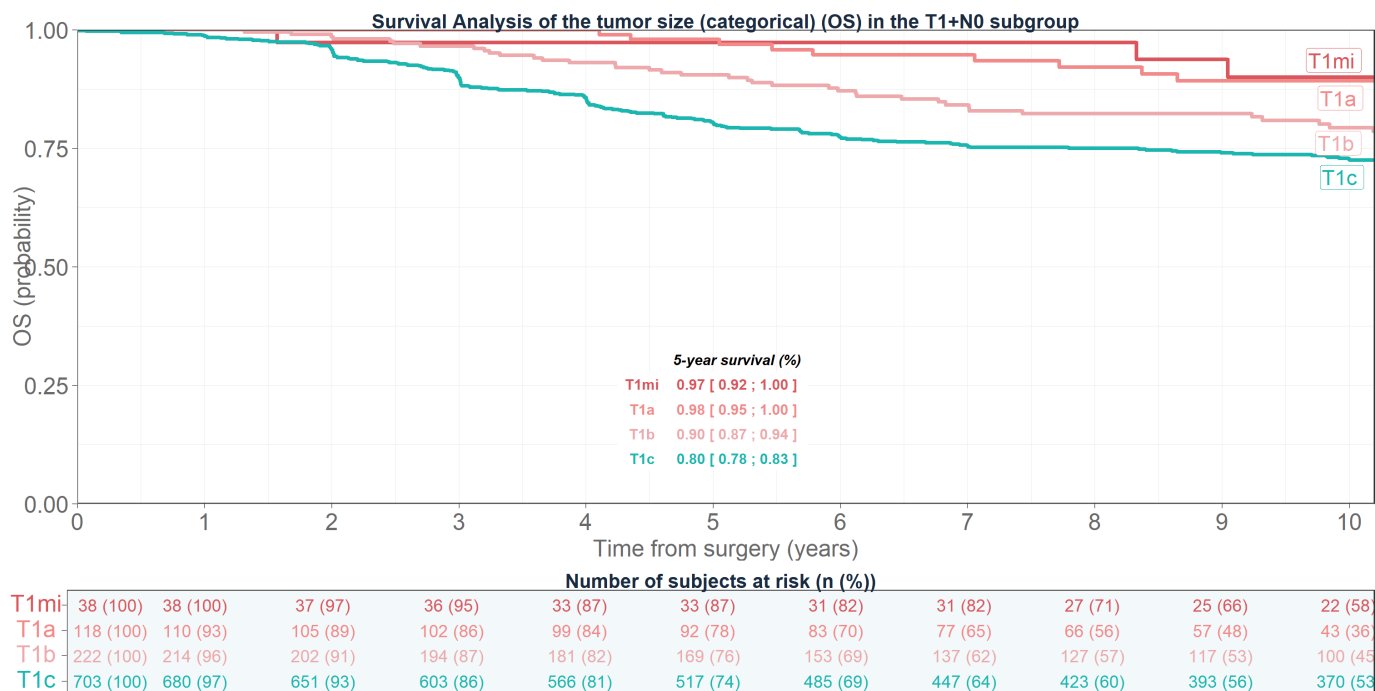

**eFigure 5-T. RFS According to T1 Substage Among Patients With Stage I TNBC (Regardless of TILs)**

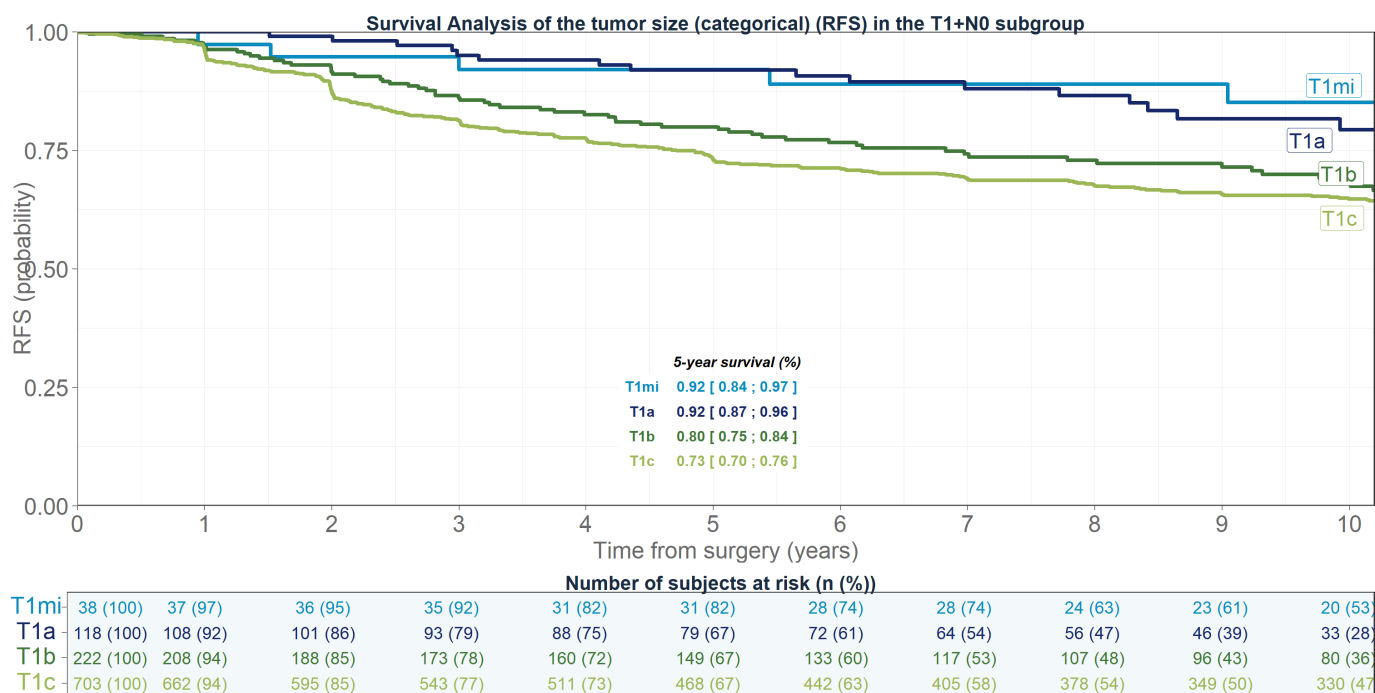

**eFigure 5-U. DDFS According to T1 Substage Among Patients With Stage I TNBC (Regardless of TILs)**

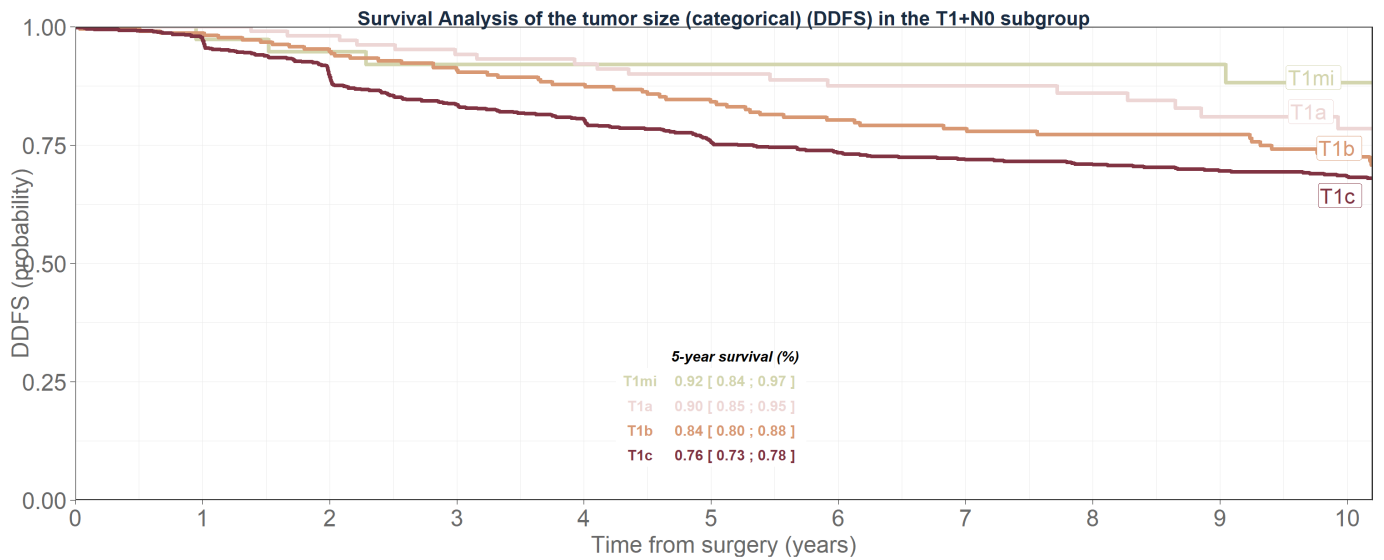

|      | Number of subjects at risk (n (%)) |          |          |          |          |          |          |          |          |          |          |
|------|------------------------------------|----------|----------|----------|----------|----------|----------|----------|----------|----------|----------|
| T1mi | 38 (100)                           | 37 (97)  | 36 (95)  | 34 (89)  | 31 (82)  | 31 (82)  | 29 (76)  | 29 (76)  | 25 (66)  | 24 (63)  | 21 (55)  |
| T1a  | 118 (100)                          | 108 (92) | 101 (86) | 93 (79)  | 87 (74)  | 78 (66)  | 69 (58)  | 64 (54)  | 57 (48)  | 45 (38)  | 32 (27)  |
| T1b  | 222 (100)                          | 211 (95) | 194 (87) | 182 (82) | 170 (77) | 156 (70) | 140 (63) | 124 (56) | 114 (51) | 104 (47) | 87 (39)  |
| T1c  | 703 (100)                          | 670 (95) | 610 (87) | 557 (79) | 528 (75) | 483 (69) | 454 (65) | 422 (60) | 396 (56) | 366 (52) | 345 (49) |

**eFigure 5-V. DRFS According to T1 Substage Among Patients With Stage I TNBC (Regardless of TILs)**

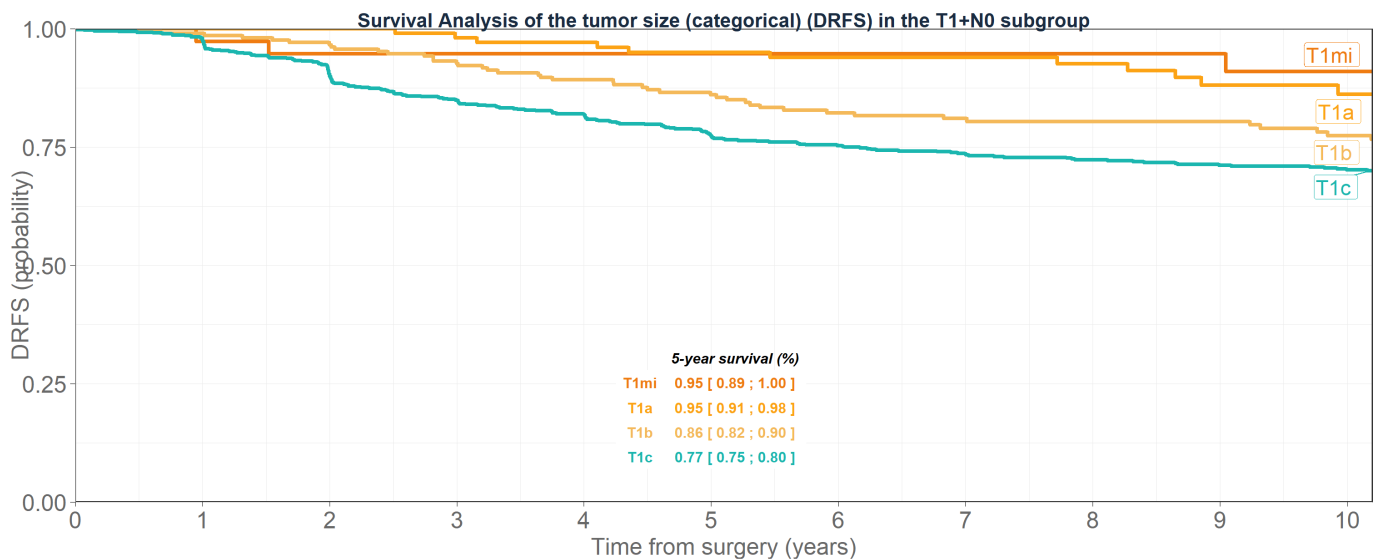

|      | Number of subjects at risk (n (%)) |          |          |          |          |          |          |          |          |          |          |
|------|------------------------------------|----------|----------|----------|----------|----------|----------|----------|----------|----------|----------|
| T1mi | 38 (100)                           | 37 (97)  | 36 (95)  | 35 (92)  | 32 (84)  | 32 (84)  | 30 (79)  | 30 (79)  | 26 (68)  | 25 (66)  | 22 (58)  |
| T1a  | 118 (100)                          | 110 (93) | 105 (89) | 100 (85) | 96 (81)  | 89 (75)  | 82 (69)  | 76 (64)  | 66 (56)  | 56 (47)  | 41 (35)  |
| T1b  | 222 (100)                          | 212 (95) | 198 (89) | 186 (84) | 173 (78) | 160 (72) | 144 (65) | 131 (59) | 123 (55) | 113 (51) | 96 (43)  |
| T1c  | 703 (100)                          | 672 (96) | 615 (87) | 570 (81) | 544 (77) | 499 (71) | 473 (67) | 436 (62) | 408 (58) | 379 (54) | 358 (51) |

**eFigure 5-W. IBCFS According to T1 Substage Among Patients With Stage I TNBC (Regardless of TILs)**

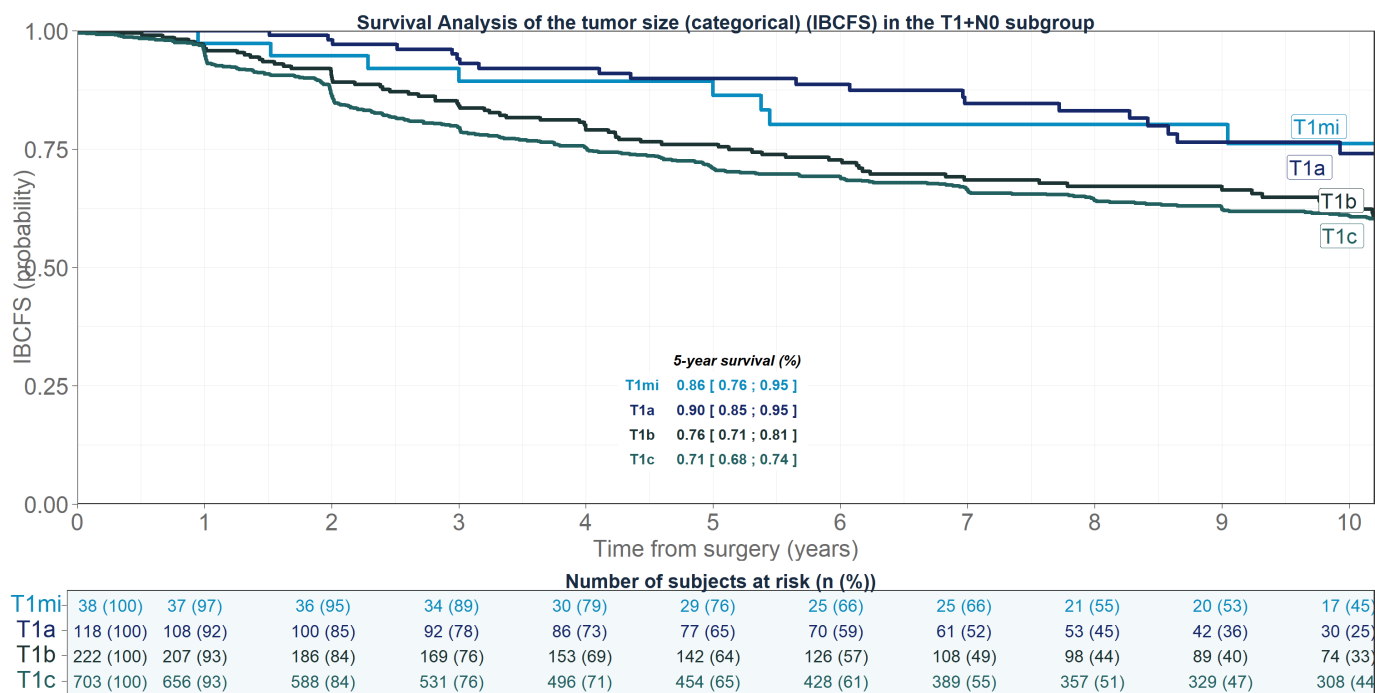

**eFigure 5-X. IDFS According to T1 Substage Among Patients With Stage I TNBC (Regardless of TILs)**

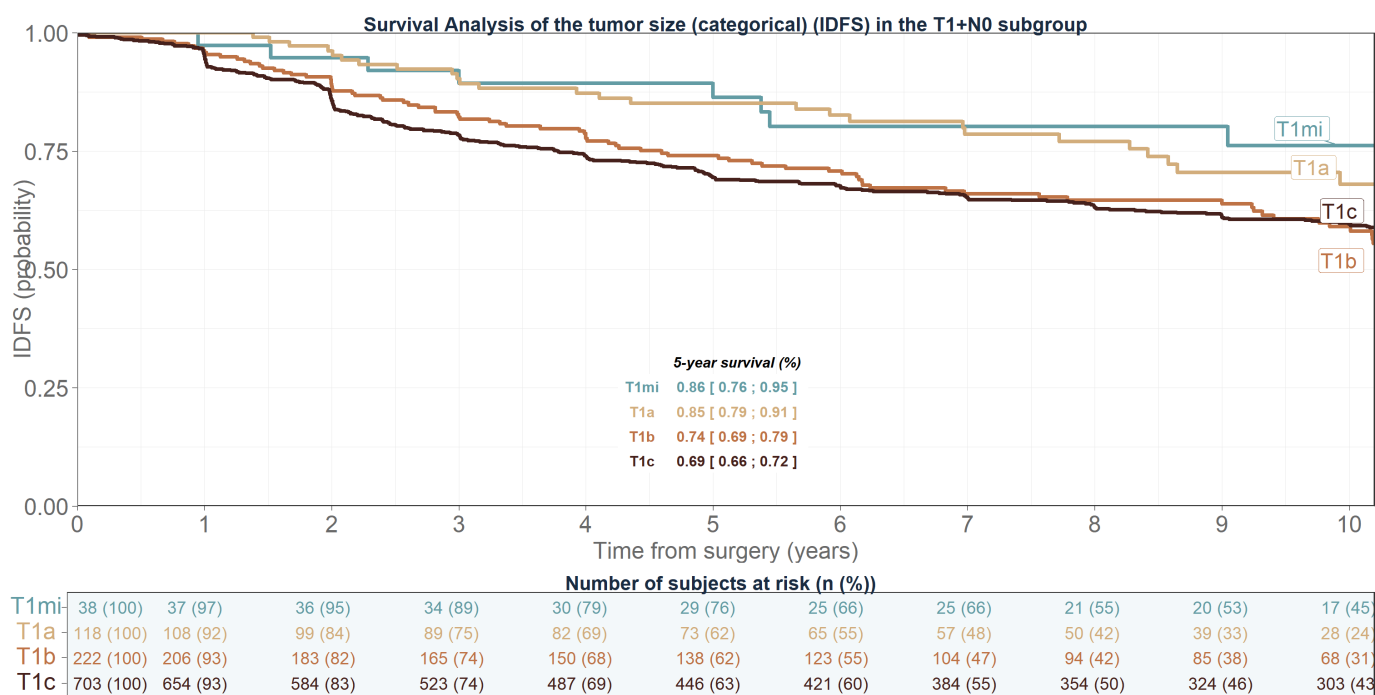

## 6. Forest Plots

Below are the **adjusted forest plots** according to the different endpoints. The Cox models used to construct the forest plots are adjusted on the clinicopathologic variables. On each graph, we report the Cochran's Q test to assess the heterogeneity of effect-size estimates from the individual studies, as well as the heterogeneity index  $I^2$ . A non-significant Q test indicates that the TILs effect is the same across studies and variations across studies are simply caused by chance.  $I^2$  provides an estimate of the percentage of variability in results across studies that is due to real differences and not due to chance. An  $I^2$  of less than 25% is considered as low heterogeneity. Missing data are imputed in each study separately by multiple imputations with 20 imputed data sets.

The forest plots are ordered according to the first year of inclusion of the study. The effect of TILs across studies over time are similar, with no clear visual trend suggesting an association between the first year of inclusion on the HR.

Forest plot ( OS )

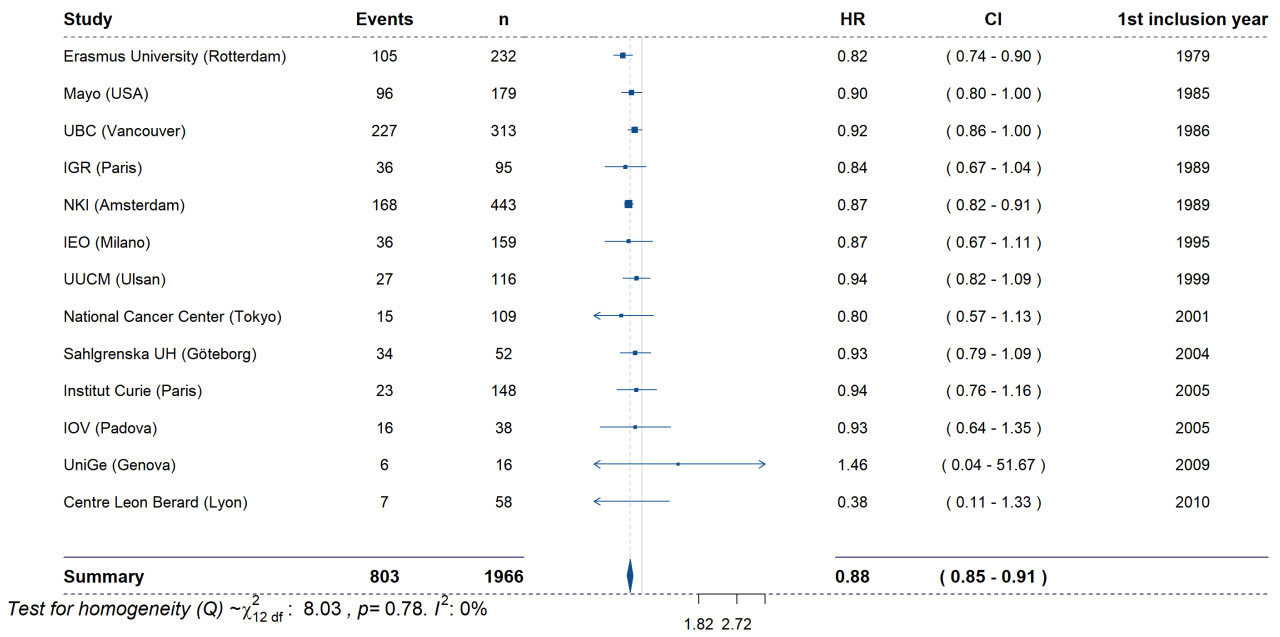

Forest plot ( RFS )

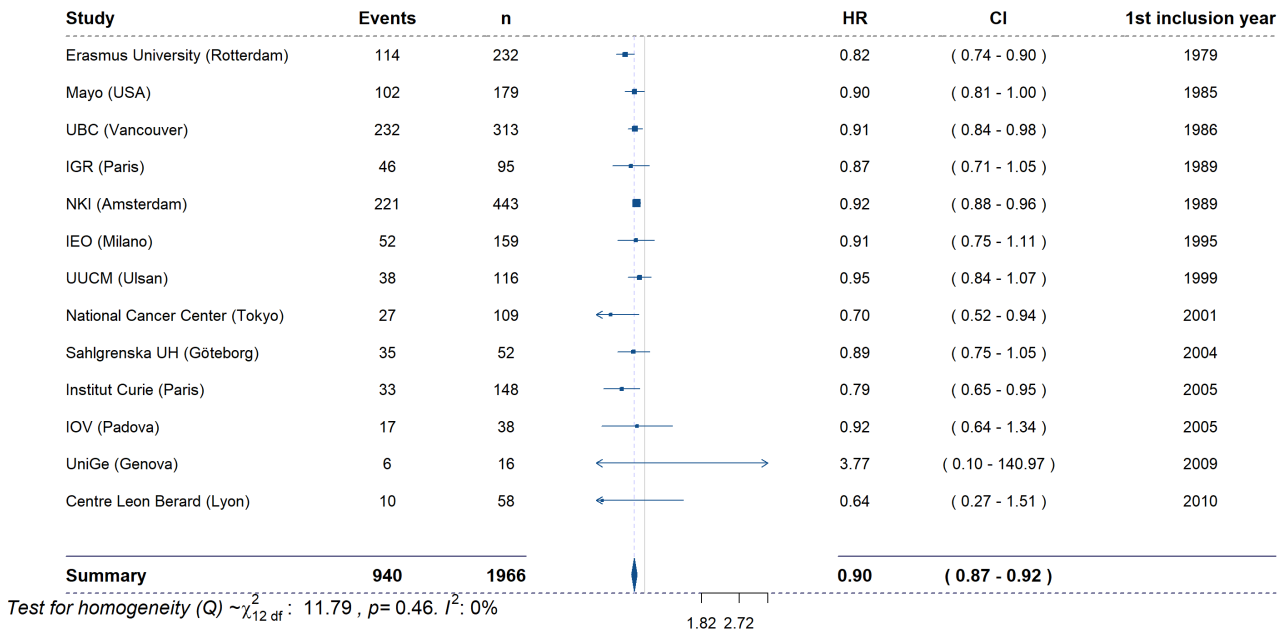

Forest plot ( DRFS )

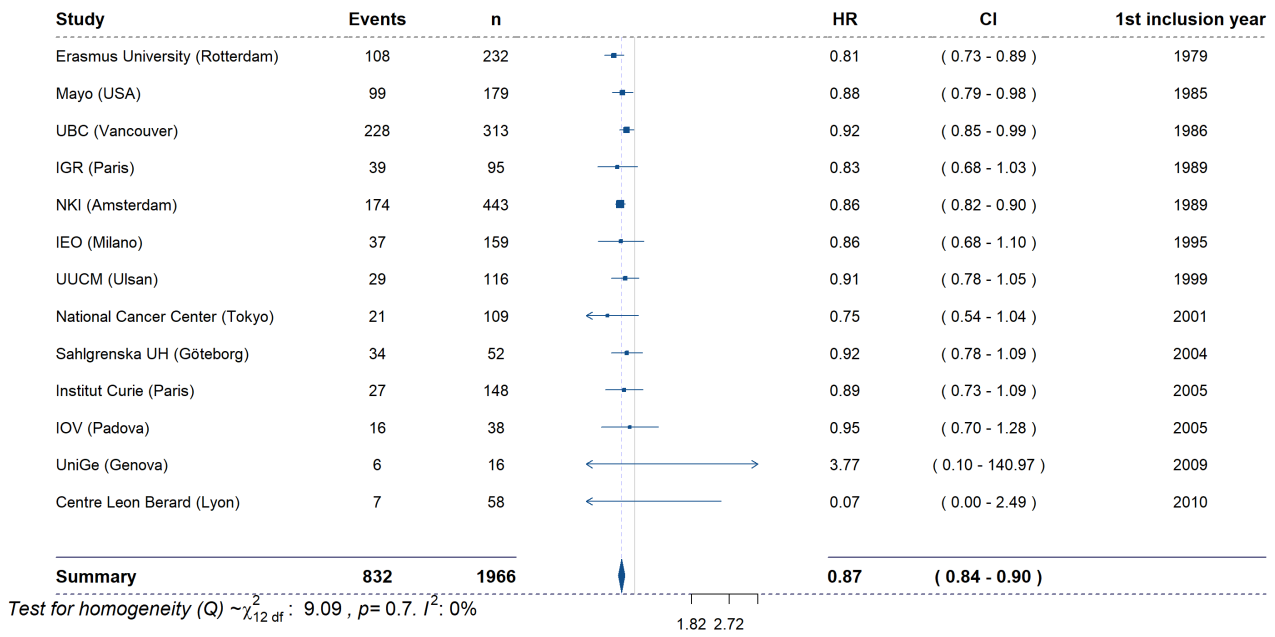

Forest plot ( IBCFS )

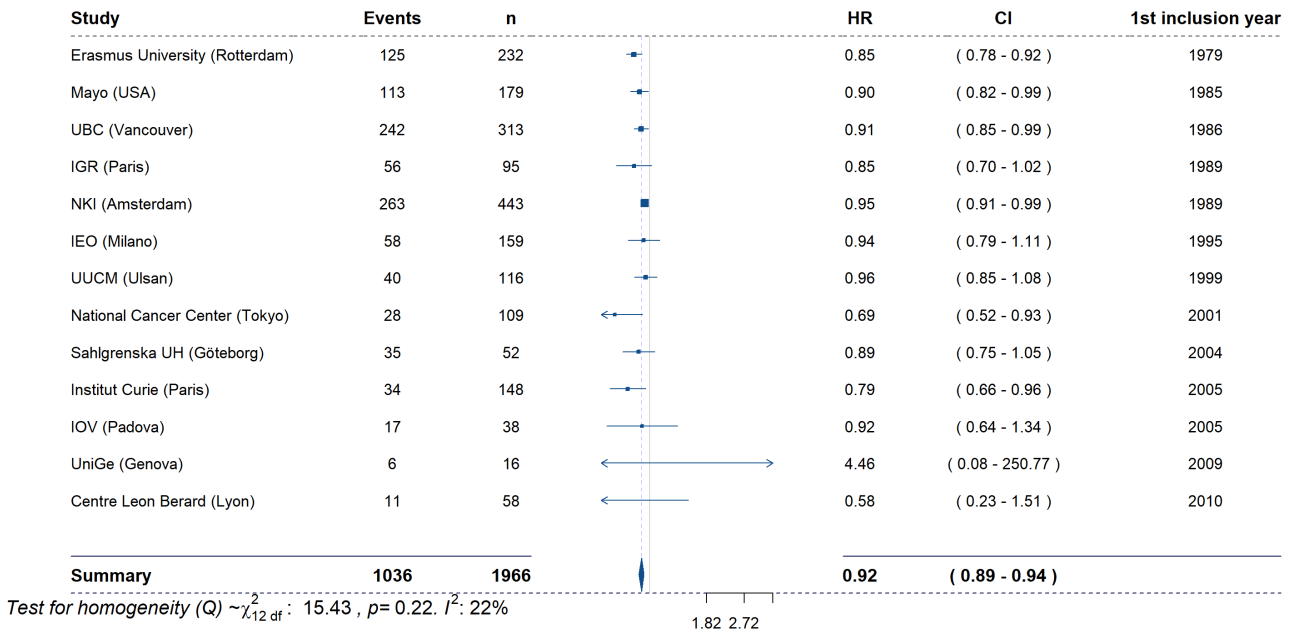

Forest plot ( IDFS )

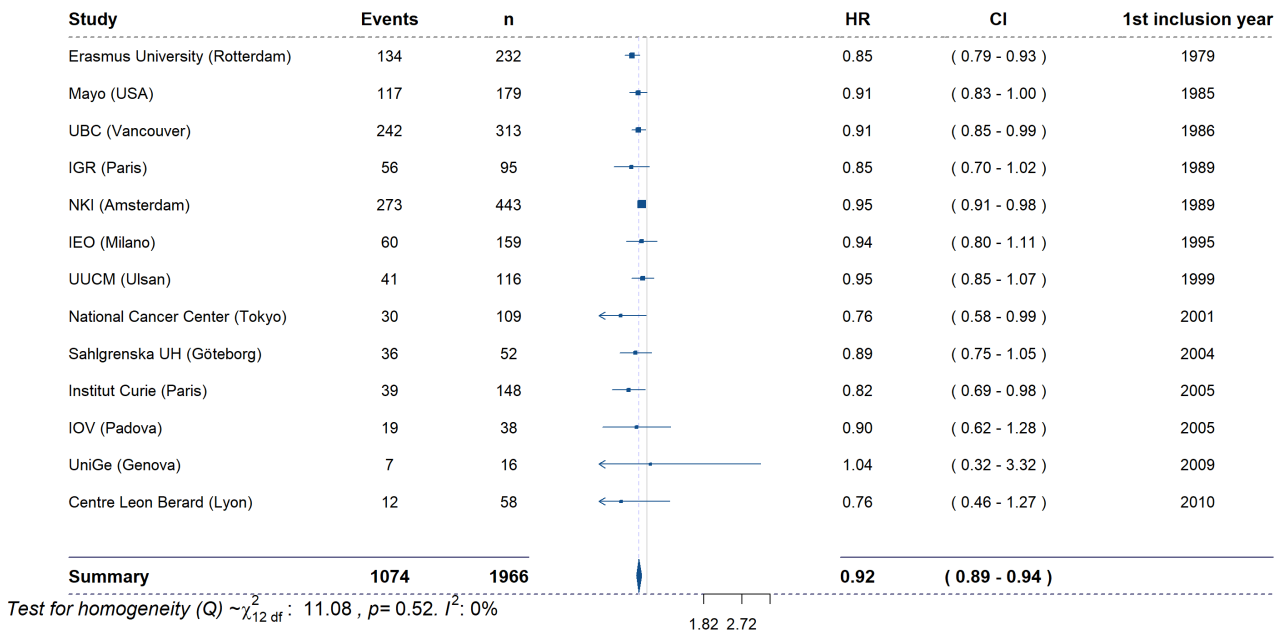

## 7. Survival rates in Subgroups

eTable 7-A. Survival Rates at 3 Years for Stage I TNBC

|                 |          | IDFS            | RFS             | DDFS            | DRFS            | OS              |                |
|-----------------|----------|-----------------|-----------------|-----------------|-----------------|-----------------|----------------|
|                 |          | 3-year survival |                |
| T1N0            | General  | 1081            | 81% [79-83]     | 84% [82-86]     | 86% [85-88]     | 88% [87-90]     | 93% [91-94]    |
|                 | [0-29]   | 728 (67%)       | 78% [76-81]     | 81% [79-84]     | 83% [81-86]     | 85% [83-88]     | 91% [89-92]    |
|                 | [30-100] | 353 (33%)       | 86% [83-89]     | 91% [88-93]     | 93% [90-95]     | 94% [92-96]     | 97% [95-98]    |
|                 | [0-49]   | 855 (79%)       | 79% [76-81]     | 81% [79-84]     | 84% [82-86]     | 86% [84-88]     | 91% [89-93]    |
|                 | [50-100] | 226 (21%)       | 90% [87-93]     | 95% [92-97]     | 96% [93-98]     | 97% [95-99]     | 99% [97-100]   |
|                 | [0-74]   | 973 (90%)       | 80% [77-82]     | 83% [81-85]     | 85% [83-87]     | 87% [85-89]     | 92% [90-93]    |
|                 | [75-100] | 108 (10%)       | 92% [87-95]     | 97% [94-100]    | 96% [93-99]     | 98% [95-100]    | 99% [97-100]   |
| T1mi N0         | General  | 38              | 92% [84-100]    | 95% [87-100]    | 92% [84-97]     | 95% [89-100]    | 97% [92-100]   |
|                 | [0-29]   | 24 (63%)        | 88% [75-96]     | 92% [83-100]    | 88% [75-100]    | 92% [83-100]    | 96% [88-100]   |
|                 | [30-100] | 14 (37%)        | 100% [100-100]  | 100% [100-100]  | 100% [100-100]  | 100% [100-100]  | 100% [100-100] |
|                 | [0-49]   | 29 (76%)        | 90% [79-97]     | 93% [86-100]    | 90% [79-100]    | 93% [86-100]    | 97% [90-100]   |
|                 | [50-100] | 9 (24%)         | 100% [100-100]  | 100% [100-100]  | 100% [100-100]  | 100% [100-100]  | 100% [100-100] |
|                 | [0-74]   | 38 (100%)       | 92% [84-100]    | 95% [89-100]    | 92% [84-100]    | 95% [89-100]    | 97% [92-100]   |
|                 | [75-100] | 12 (10%)        | 91% [75-100]    | 100% [100-100]  | 91% [75-100]    | 100% [100-100]  | 100% [100-100] |
| T1a N0          | General  | 118             | 90% [85-95]     | 95% [91-98]     | 94% [90-98]     | 98% [96-100]    | 100% [100-100] |
|                 | [0-29]   | 72 (61%)        | 90% [84-96]     | 95% [90-100]    | 94% [88-98]     | 97% [93-100]    | 100% [100-100] |
|                 | [30-100] | 46 (39%)        | 90% [81-98]     | 95% [89-100]    | 95% [89-100]    | 100% [100-100]  | 100% [100-100] |
|                 | [0-49]   | 88 (75%)        | 90% [83-95]     | 95% [90-99]     | 94% [89-98]     | 97% [95-100]    | 100% [100-100] |
|                 | [50-100] | 30 (25%)        | 92% [82-100]    | 96% [88-100]    | 96% [88-100]    | 100% [100-100]  | 100% [100-100] |
|                 | [0-74]   | 106 (90%)       | 90% [85-95]     | 94% [90-98]     | 95% [90-98]     | 98% [95-100]    | 100% [100-100] |
|                 | [75-100] | 12 (10%)        | 91% [75-100]    | 100% [100-100]  | 91% [75-100]    | 100% [100-100]  | 100% [100-100] |
| T1mi and T1a N0 | General  | 156             | 91% [86-94]     | 95% [92-98]     | 94% [90-97]     | 97% [95-99]     | 99% [98-100]   |
|                 | [0-29]   | 96 (62%)        | 90% [84-94]     | 94% [90-98]     | 92% [87-97]     | 96% [92-99]     | 99% [97-100]   |
|                 | [30-100] | 60 (38%)        | 92% [86-98]     | 96% [92-100]    | 96% [92-100]    | 100% [100-100]  | 100% [100-100] |
|                 | [0-49]   | 117 (75%)       | 90% [85-94]     | 94% [91-98]     | 93% [89-96]     | 96% [93-99]     | 99% [97-100]   |
|                 | [50-100] | 39 (25%)        | 94% [86-100]    | 97% [91-100]    | 97% [91-100]    | 100% [100-100]  | 100% [100-100] |
|                 | [0-74]   | 144 (92%)       | 91% [87-95]     | 95% [91-98]     | 94% [90-97]     | 97% [95-99]     | 99% [98-100]   |
|                 | [75-100] | 12 (8%)         | 91% [75-100]    | 100% [100-100]  | 91% [73-100]    | 100% [100-100]  | 100% [100-100] |
| T1b N0          | General  | 222             | 82% [78-86]     | 86% [82-90]     | 91% [88-94]     | 93% [90-96]     | 97% [94-99]    |
|                 | [0-29]   | 154 (69%)       | 80% [75-85]     | 83% [78-88]     | 88% [84-92]     | 91% [87-95]     | 96% [94-99]    |
|                 | [30-100] | 68 (31%)        | 87% [80-94]     | 92% [87-97]     | 97% [92-100]    | 97% [93-100]    | 97% [92-100]   |
|                 | [0-49]   | 185 (83%)       | 81% [76-86]     | 84% [79-89]     | 90% [85-93]     | 92% [88-95]     | 96% [94-98]    |
|                 | [50-100] | 37 (17%)        | 88% [79-97]     | 97% [91-100]    | 97% [91-100]    | 97% [91-100]    | 97% [91-100]   |
|                 | [0-74]   | 204 (92%)       | 82% [77-86]     | 85% [81-90]     | 91% [87-94]     | 93% [89-96]     | 97% [95-99]    |
|                 | [75-100] | 18 (8%)         | 88% [75-100]    | 94% [82-100]    | 94% [82-100]    | 94% [83-100]    | 94% [83-100]   |
| T1c N0          | General  | 703             | 78% [76-81]     | 81% [79-84]     | 84% [81-86]     | 85% [83-87]     | 90% [88-92]    |
|                 | [0-29]   | 478 (68%)       | 76% [72-79]     | 78% [75-81]     | 80% [77-83]     | 82% [79-85]     | 87% [84-90]    |
|                 | [30-100] | 225 (32%)       | 85% [80-89]     | 89% [85-92]     | 91% [87-94]     | 92% [89-95]     | 96% [94-98]    |
|                 | [0-49]   | 553 (79%)       | 75% [72-78]     | 78% [75-81]     | 80% [78-83]     | 82% [79-85]     | 88% [85-90]    |
|                 | [50-100] | 150 (21%)       | 90% [86-94]     | 94% [90-97]     | 95% [92-98]     | 96% [93-99]     | 99% [97-100]   |
|                 | [0-74]   | 625 (89%)       | 77% [74-79]     | 79% [76-82]     | 82% [79-84]     | 83% [81-86]     | 89% [87-91]    |
|                 | [75-100] | 78 (11%)        | 92% [87-97]     | 97% [95-100]    | 97% [95-100]    | 99% [96-100]    | 100% [100-100] |

**eTable 7-B. Survival Rates at 3, 5, and 10 Years According to Age and TIL Levels**

| Sample       | TILs levels | n(%)      | Estimated survival with 95% bootstrapped interval confidence |             |             |              |              |              |              |             |             |              |              |              |                |              |              |
|--------------|-------------|-----------|--------------------------------------------------------------|-------------|-------------|--------------|--------------|--------------|--------------|-------------|-------------|--------------|--------------|--------------|----------------|--------------|--------------|
|              |             |           | IDFS                                                         |             |             | RFS          |              |              | DDFS         |             |             | DRFS         |              |              | OS             |              |              |
|              |             |           | 3-year                                                       | 5-year      | 10-year     | 3-year       | 5-year       | 10-year      | 3-year       | 5-year      | 10-year     | 3-year       | 5-year       | 10-year      | 3-year         | 5-year       | 10-year      |
| T1N0         | General     | 1081      | 81% [79-83]                                                  | 73% [70-75] | 61% [58-64] | 84% [82-86]  | 77% [75-79]  | 68% [65-70]  | 86% [85-88]  | 79% [77-81] | 71% [69-73] | 88% [87-90]  | 82% [79-84]  | 74% [72-77]  | 93% [91-94]    | 85% [83-87]  | 76% [74-79]  |
|              | [0-29]      | 728 (67%) | 78% [76-81]                                                  | 69% [66-72] | 58% [55-61] | 81% [79-84]  | 73% [70-76]  | 64% [61-67]  | 83% [81-86]  | 76% [73-78] | 66% [63-69] | 85% [83-88]  | 78% [75-80]  | 70% [67-73]  | 91% [89-92]    | 82% [79-84]  | 72% [69-75]  |
|              | [30-100]    | 353 (33%) | 86% [83-89]                                                  | 80% [76-83] | 68% [63-72] | 91% [88-93]  | 85% [82-88]  | 76% [71-80]  | 93% [90-95]  | 87% [84-90] | 81% [77-84] | 94% [92-96]  | 90% [87-92]  | 83% [80-87]  | 97% [95-98]    | 91% [88-94]  | 84% [81-88]  |
|              | [50-100]    | 226 (21%) | 90% [87-93]                                                  | 84% [80-88] | 70% [64-75] | 95% [92-97]  | 89% [86-93]  | 78% [73-83]  | 96% [93-98]  | 91% [88-94] | 86% [81-90] | 97% [95-99]  | 94% [91-96]  | 88% [84-91]  | 99% [97-100]   | 95% [92-97]  | 89% [85-92]  |
|              | [60-100]    | 189 (17%) | 90% [86-93]                                                  | 85% [81-89] | 70% [64-76] | 95% [92-98]  | 90% [87-94]  | 78% [72-83]  | 96% [94-98]  | 92% [89-95] | 87% [82-91] | 97% [95-99]  | 94% [92-97]  | 89% [85-93]  | 99% [97-100]   | 96% [93-98]  | 90% [86-94]  |
|              | [75-100]    | 108 (10%) | 92% [87-96]                                                  | 86% [80-91] | 73% [65-80] | 97% [94-99]  | 91% [87-95]  | 80% [73-87]  | 96% [93-99]  | 92% [88-96] | 90% [86-95] | 98% [95-100] | 95% [92-98]  | 92% [88-96]  | 99% [97-100]   | 96% [93-99]  | 92% [88-96]  |
| T1N0 40+y    | General     | 749       | 85% [82-87]                                                  | 75% [72-78] | 62% [59-66] | 87% [85-89]  | 79% [76-82]  | 69% [65-72]  | 88% [86-90]  | 81% [78-84] | 70% [67-73] | 91% [89-92]  | 84% [81-86]  | 74% [71-77]  | 94% [92-95]    | 87% [85-89]  | 77% [74-80]  |
|              | [0-29]      | 540 (72%) | 83% [80-85]                                                  | 73% [69-76] | 59% [55-63] | 85% [83-88]  | 76% [73-79]  | 65% [61-69]  | 87% [85-89]  | 78% [75-82] | 67% [63-71] | 89% [87-92]  | 81% [78-84]  | 71% [67-74]  | 93% [91-95]    | 84% [82-87]  | 74% [70-77]  |
|              | [30-100]    | 209 (28%) | 89% [86-93]                                                  | 82% [77-87] | 72% [66-78] | 91% [88-95]  | 87% [83-91]  | 79% [74-84]  | 92% [89-95]  | 87% [83-91] | 79% [74-84] | 94% [91-97]  | 91% [87-94]  | 83% [77-88]  | 96% [94-98]    | 92% [89-95]  | 85% [80-89]  |
|              | [50-100]    | 112 (15%) | 94% [90-98]                                                  | 89% [83-94] | 78% [71-86] | 96% [92-99]  | 93% [88-97]  | 82% [75-89]  | 95% [91-98]  | 93% [88-97] | 85% [77-91] | 97% [94-99]  | 96% [93-99]  | 87% [81-93]  | 98% [95-100]   | 97% [94-99]  | 90% [84-95]  |
|              | [60-100]    | 85 (11%)  | 94% [88-97]                                                  | 92% [87-97] | 83% [74-91] | 96% [92-100] | 96% [92-99]  | 85% [77-93]  | 95% [90-99]  | 95% [90-99] | 88% [81-95] | 97% [94-100] | 97% [94-100] | 90% [82-96]  | 99% [96-100]   | 99% [96-100] | 93% [87-98]  |
|              | [75-100]    | 41 (5%)   | 92% [85-98]                                                  | 90% [82-97] | 87% [77-95] | 97% [93-100] | 97% [92-100] | 92% [83-100] | 92% [85-100] | 92% [85-98] | 92% [84-98] | 97% [92-100] | 97% [92-100] | 95% [89-100] | 97% [92-100]   | 97% [92-100] | 95% [89-100] |
| T1N0 18-40 y | General     | 332       | 73% [69-77]                                                  | 66% [62-71] | 57% [53-62] | 78% [75-82]  | 72% [68-76]  | 65% [61-70]  | 82% [79-86]  | 76% [72-80] | 72% [67-75] | 83% [80-86]  | 77% [73-81]  | 73% [69-77]  | 90% [87-93]    | 81% [77-84]  | 75% [71-78]  |
|              | [0-29]      | 188 (57%) | 66% [60-72]                                                  | 59% [53-65] | 53% [47-60] | 69% [63-75]  | 64% [58-70]  | 59% [53-65]  | 74% [68-79]  | 68% [62-73] | 63% [57-69] | 75% [69-80]  | 68% [62-73]  | 64% [59-70]  | 85% [80-89]    | 74% [69-80]  | 67% [62-73]  |
|              | [30-100]    | 144 (43%) | 83% [78-88]                                                  | 76% [70-82] | 63% [56-69] | 90% [85-93]  | 82% [77-87]  | 72% [66-78]  | 94% [90-97]  | 87% [82-92] | 82% [77-88] | 94% [90-97]  | 88% [84-92]  | 84% [79-89]  | 97% [95-99]    | 89% [85-94]  | 84% [79-89]  |
|              | [50-100]    | 114 (34%) | 87% [81-92]                                                  | 80% [73-86] | 63% [56-71] | 94% [89-97]  | 87% [81-92]  | 74% [67-81]  | 96% [94-99]  | 90% [86-95] | 86% [80-91] | 96% [94-99]  | 92% [88-96]  | 88% [82-93]  | 99% [97-100]   | 93% [89-96]  | 88% [82-93]  |
|              | [60-100]    | 104 (31%) | 86% [81-92]                                                  | 80% [73-86] | 62% [54-69] | 94% [90-98]  | 86% [81-91]  | 73% [66-79]  | 97% [94-100] | 90% [85-95] | 85% [80-91] | 97% [94-100] | 92% [87-96]  | 87% [82-92]  | 99% [97-100]   | 93% [88-97]  | 87% [81-92]  |
|              | [75-100]    | 67 (20%)  | 91% [85-97]                                                  | 84% [76-91] | 65% [56-76] | 97% [93-100] | 88% [82-94]  | 74% [66-83]  | 99% [96-100] | 93% [87-97] | 89% [83-95] | 99% [96-100] | 94% [90-99]  | 91% [85-97]  | 100% [100-100] | 96% [91-99]  | 91% [85-97]  |



## 8. Competing Risk Analysis

We aim to see the effect of TILs on the occurrence of a second cancer and distant relapse or death. To do this, we will estimate cumulative incidence functions from the competing risks data, as well as estimates and 95% confidence intervals for survival rates.

In this analysis, TILs are classified into two categories. First, TILs levels above and below 30%, and then above and below 50%.

Data on second cancers was not available in the UBC cohort (309 patients) and as such was excluded from this additional analysis.

eTable 8-A. Competing Events

| Censored | Distant relapse or Death | Second cancer | Sum  |
|----------|--------------------------|---------------|------|
| 988      | 541                      | 128           | 1657 |

We plot below Aalen-Johansen curves for competing events. The confidence intervals for cumulative incidence estimates are calculated in the following way<sup>14</sup>:  $\lambda(x) \pm z \cdot se(\lambda(x) \cdot \log(x))$ , where  $\lambda(x)$  is the cumulative incidence estimate,  $se(\lambda)$  is the standard error estimate, and  $z$  is the z-score associated with the confidence level of the interval, e.g.  $z=1.96$  for a 95% CI.

eTable 8-B. Competing Events According to TILs Level (30% Threshold)

|            | Censored   | Distant relapse or Death | Second cancer | Sum         |
|------------|------------|--------------------------|---------------|-------------|
| TILs <30%  | 591        | 404                      | 88            | 1083        |
| TILs ≥ 30% | 397        | 137                      | 40            | 574         |
| <b>Sum</b> | <b>988</b> | <b>541</b>               | <b>128</b>    | <b>1657</b> |

eFigure 8-A. Influence of TILs <30% vs ≥30% on Distant Relapse, Death, or Second Cancers

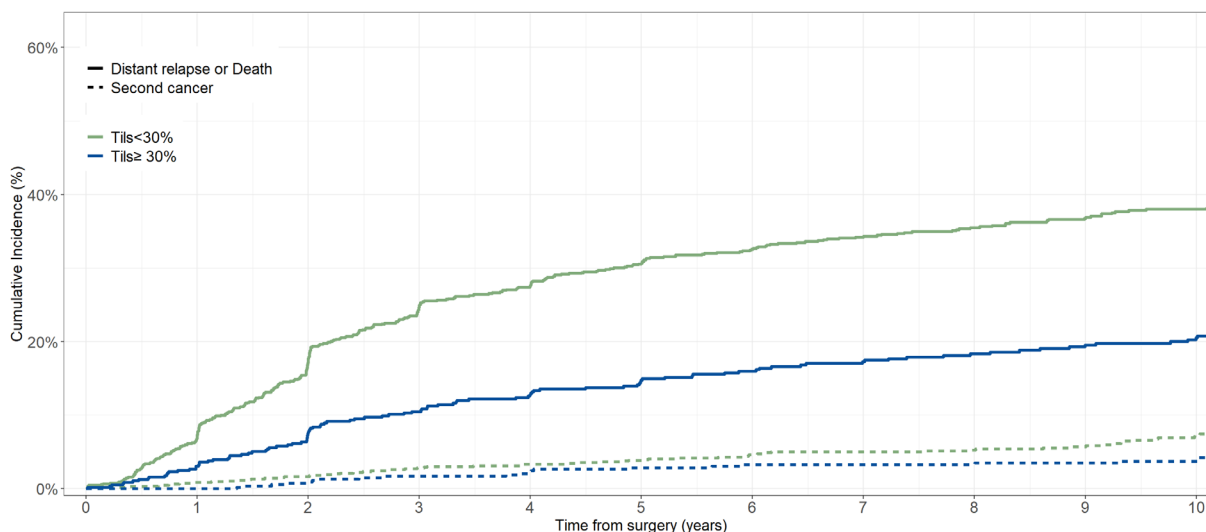

| At Risk    |      |     |     |     |     |     |     |     |     |     |     |
|------------|------|-----|-----|-----|-----|-----|-----|-----|-----|-----|-----|
| TILs <30%  | 1083 | 958 | 825 | 717 | 661 | 604 | 545 | 495 | 437 | 386 | 325 |
| TILs ≥ 30% | 574  | 535 | 489 | 460 | 442 | 409 | 389 | 364 | 344 | 324 | 301 |

| Characteristic | N | 3-year cum inc | 5-year cum inc | 10-year cum inc |
|----------------|---|----------------|----------------|-----------------|
|----------------|---|----------------|----------------|-----------------|

### Distant relapse or Death

|            |       |                 |                |                |
|------------|-------|-----------------|----------------|----------------|
| Total      | 1,657 |                 |                |                |
| TILs <30%  | 1,083 | 25% (22%, 28%)  | 31% (28%, 34%) | 38% (35%, 41%) |
| TILs ≥ 30% | 574   | 10% (8.1%, 13%) | 15% (12%, 18%) | 21% (17%, 24%) |

### Second cancer

|            |       |                    |                   |                   |
|------------|-------|--------------------|-------------------|-------------------|
| Total      | 1,657 |                    |                   |                   |
| TILs <30%  | 1,083 | 2.8% (1.9%, 4.0%)  | 3.9% (2.8%, 5.2%) | 7.3% (5.6%, 9.2%) |
| TILs ≥ 30% | 574   | 1.7% (0.83%, 3.1%) | 2.8% (1.7%, 4.5%) | 3.7% (2.3%, 5.6%) |

eTable 8-C. Competing Events According to TILs Level (50% Threshold)

|            | <b>Censored</b> | <b>Distant relapse or Death</b> | <b>Second cancer</b> | <b>Sum</b>  |
|------------|-----------------|---------------------------------|----------------------|-------------|
| Tils<50%   | 708             | 465                             | 100                  | 1273        |
| Tils≥ 50%  | 280             | 76                              | 28                   | 384         |
| <b>Sum</b> | <b>988</b>      | <b>541</b>                      | <b>128</b>           | <b>1657</b> |

eFigure 8-B. Influence of TILs <50% vs ≥50% on Distant Relapse, Death, or Second Cancers

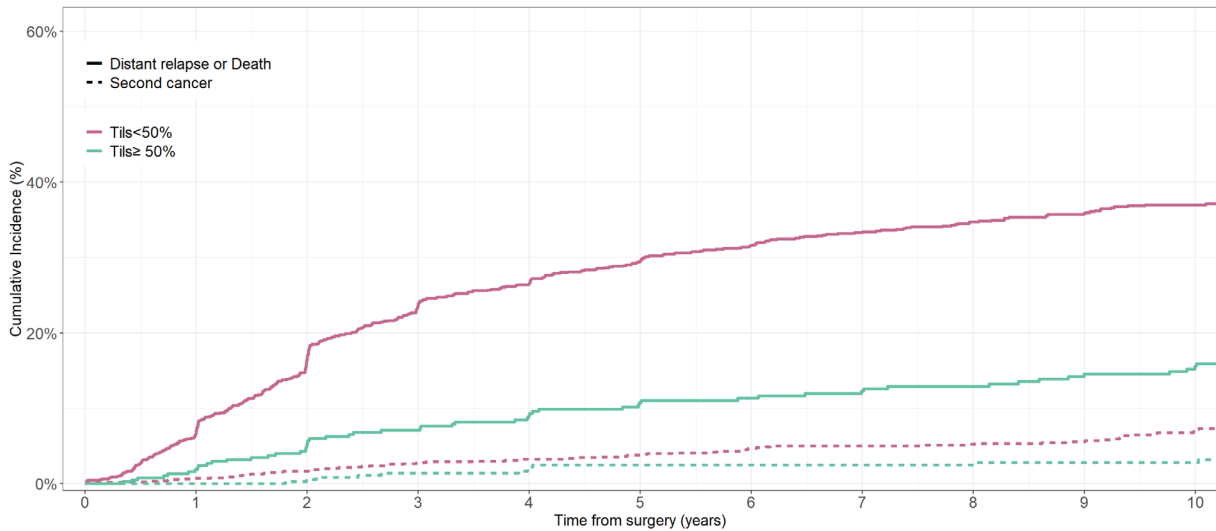

| At Risk   | 0    | 1    | 2   | 3   | 4   | 5   | 6   | 7   | 8   | 9   | 10  |
|-----------|------|------|-----|-----|-----|-----|-----|-----|-----|-----|-----|
| Tils<50%  | 1273 | 1129 | 973 | 849 | 786 | 719 | 646 | 584 | 518 | 461 | 392 |
| Tils≥ 50% | 384  | 364  | 341 | 328 | 317 | 294 | 288 | 275 | 263 | 249 | 234 |

| Characteristic                  | N     | 3-year cum inc     | 5-year cum inc    | 10-year cum inc   |
|---------------------------------|-------|--------------------|-------------------|-------------------|
| <b>Distant relapse or Death</b> |       |                    |                   |                   |
| Total                           | 1,657 |                    |                   |                   |
| Tils<50%                        | 1,273 | 24% (21%, 26%)     | 30% (27%, 32%)    | 37% (34%, 40%)    |
| Tils≥ 50%                       | 384   | 7.1% (4.8%, 10%)   | 11% (7.8%, 14%)   | 16% (12%, 20%)    |
| <b>Second cancer</b>            |       |                    |                   |                   |
| Total                           | 1,657 |                    |                   |                   |
| Tils<50%                        | 1,273 | 2.7% (1.9%, 3.8%)  | 3.8% (2.8%, 5.0%) | 7.0% (5.6%, 8.8%) |
| Tils≥ 50%                       | 384   | 1.4% (0.53%, 3.0%) | 2.5% (1.2%, 4.5%) | 2.8% (1.5%, 5.0%) |

eTable 8-D. Competing Events According to TILs Level (30% Threshold) in the pN0 Population

|            | <b>Censored</b> | <b>Distant relapse or Death</b> | <b>Second cancer</b> | <b>Sum</b>  |
|------------|-----------------|---------------------------------|----------------------|-------------|
| Tils<30%   | 551             | 309                             | 74                   | 934         |
| Tils≥ 30%  | 363             | 106                             | 40                   | 509         |
| <b>Sum</b> | <b>914</b>      | <b>415</b>                      | <b>114</b>           | <b>1443</b> |

**eFigure 8-C. Influence of TILs <30% vs ≥30% on Distant Relapse, Death, or Second Cancers in Node-Negative TNBC**

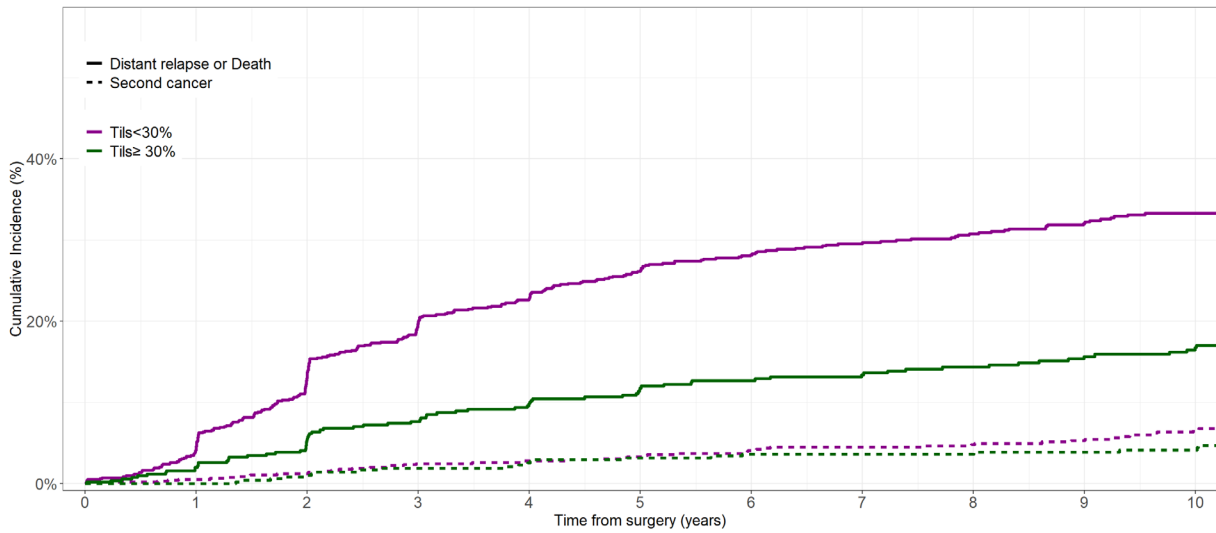

| At Risk   |     |     |     |     |     |     |     |     |     |     |     |    |
|-----------|-----|-----|-----|-----|-----|-----|-----|-----|-----|-----|-----|----|
|           |     | 0   | 1   | 2   | 3   | 4   | 5   | 6   | 7   | 8   | 9   | 10 |
| TILs <30% | 934 | 857 | 755 | 667 | 616 | 563 | 507 | 463 | 413 | 364 | 310 |    |
| TILs ≥30% | 509 | 480 | 445 | 422 | 408 | 381 | 364 | 343 | 325 | 306 | 289 |    |

  

| Characteristic                  | N     | 3-year cum inc     | 5-year cum inc    | 10-year cum inc   |
|---------------------------------|-------|--------------------|-------------------|-------------------|
| <b>Distant relapse or Death</b> |       |                    |                   |                   |
| Total                           | 1,443 |                    |                   |                   |
| TILs <30%                       | 934   | 20% (17%, 23%)     | 26% (23%, 29%)    | 33% (30%, 37%)    |
| TILs ≥30%                       | 509   | 7.7% (5.5%, 10%)   | 12% (9.1%, 15%)   | 17% (13%, 20%)    |
| <b>Second cancer</b>            |       |                    |                   |                   |
| Total                           | 1,443 |                    |                   |                   |
| TILs <30%                       | 934   | 2.5% (1.6%, 3.7%)  | 3.3% (2.3%, 4.7%) | 6.6% (4.9%, 8.5%) |
| TILs ≥30%                       | 509   | 1.9% (0.94%, 3.4%) | 3.2% (1.9%, 5.1%) | 4.2% (2.6%, 6.3%) |

**eTable 8-E. Competing Events According to TILs Level (50% Threshold) in the pN0 Population**

|            | Censored   | Distant relapse or Death | Second cancer | Sum         |
|------------|------------|--------------------------|---------------|-------------|
| TILs <50%  | 654        | 356                      | 86            | 1096        |
| TILs ≥50%  | 260        | 59                       | 28            | 347         |
| <b>Sum</b> | <b>914</b> | <b>415</b>               | <b>114</b>    | <b>1443</b> |

**eFigure 8-D. Influence of TILs <30% vs ≥30% on Distant Relapse, Death, or Second Cancers in Node-Negative TNBC**

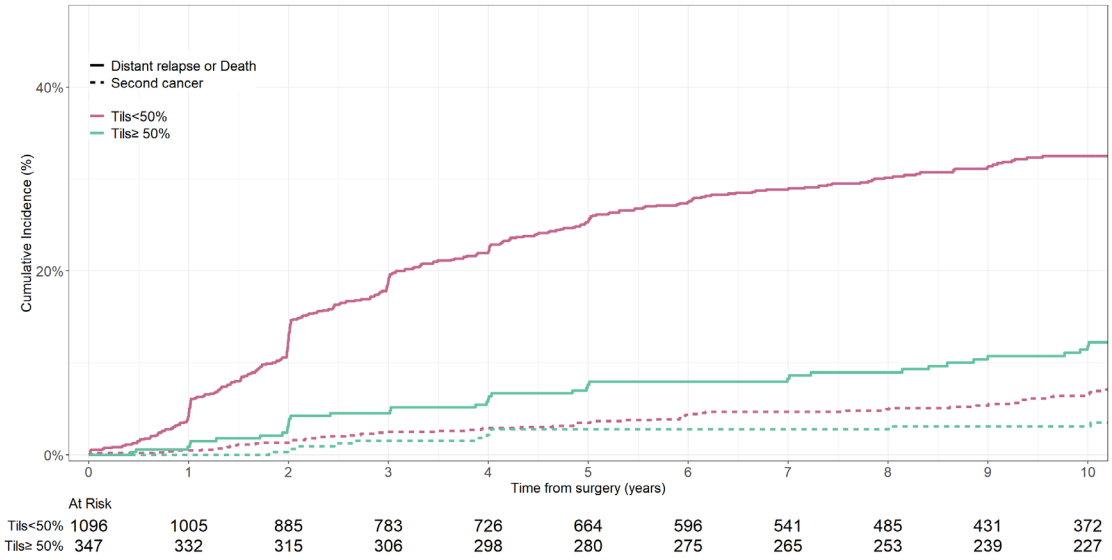

|                                 | N     | 3-year cum inc     | 5-year cum inc    | 10-year cum inc   |
|---------------------------------|-------|--------------------|-------------------|-------------------|
| <b>Characteristic</b>           |       |                    |                   |                   |
| <b>Distant relapse or Death</b> |       |                    |                   |                   |
| Total                           | 1,443 |                    |                   |                   |
| TILs<50%                        | 1,096 | 19% (17%, 22%)     | 26% (23%, 28%)    | 33% (30%, 36%)    |
| TILs≥ 50%                       | 347   | 4.5% (2.6%, 7.2%)  | 7.6% (5.1%, 11%)  | 12% (8.5%, 16%)   |
| <b>Second cancer</b>            |       |                    |                   |                   |
| Total                           | 1,443 |                    |                   |                   |
| TILs<50%                        | 1,096 | 2.5% (1.6%, 3.6%)  | 3.4% (2.4%, 4.7%) | 6.6% (5.1%, 8.4%) |
| TILs≥ 50%                       | 347   | 1.5% (0.58%, 3.4%) | 2.8% (1.4%, 5.0%) | 4.2% (1.6%, 5.5%) |

## 9. Time-Dependent ROC curves and AUC

We evaluate the discriminating ability of TILs by measuring the area under the time-dependent ROC curve (**AUC**) estimation at 5 and 10 years.

We use time-dependent ROC curves from censored survival data using Inverse Probability of Censoring Weighting (IPCW) estimates of Cumulative/Dynamic time-dependent ROC curve.<sup>15</sup> For each element (tils, clinicopathological factors, tilts + clinicopathological factors), at each unique marker value, proportions of true and false positives are calculated considering the time threshold of 5 years.

We also show pointwise confidence intervals. They are computed using an estimate of the variance and the quantiles of the standard normal distribution.

| eTable 9-A. AUC (IPCW) at 5 Years and Confidence Interval (CI) |      |        |      |
|----------------------------------------------------------------|------|--------|------|
|                                                                | AUC  | 95% CI |      |
| <b>OS</b>                                                      |      |        |      |
| Tils                                                           | 0.61 | 0.58   | 0.64 |
| Clinico-pathological factors (CP)                              | 0.67 | 0.63   | 0.70 |
| CP + tilts                                                     | 0.71 | 0.68   | 0.74 |
| <b>RFS</b>                                                     |      |        |      |
| Tils                                                           | 0.60 | 0.57   | 0.62 |
| Clinico-pathological factors (CP)                              | 0.65 | 0.62   | 0.68 |
| CP + tilts                                                     | 0.69 | 0.66   | 0.72 |
| <b>DDFS</b>                                                    |      |        |      |
| Tils                                                           | 0.60 | 0.57   | 0.63 |
| Clinico-pathological factors (CP)                              | 0.64 | 0.61   | 0.67 |
| CP + tilts                                                     | 0.69 | 0.66   | 0.71 |
| <b>DRFS</b>                                                    |      |        |      |
| Tils                                                           | 0.61 | 0.58   | 0.63 |
| Clinico-pathological factors (CP)                              | 0.66 | 0.63   | 0.69 |
| CP + tilts                                                     | 0.71 | 0.68   | 0.73 |
| <b>IBCFs</b>                                                   |      |        |      |
| Tils                                                           | 0.58 | 0.55   | 0.61 |
| Clinico-pathological factors (CP)                              | 0.65 | 0.62   | 0.68 |
| CP + tilts                                                     | 0.68 | 0.66   | 0.71 |
| <b>IDFS</b>                                                    |      |        |      |
| Tils                                                           | 0.58 | 0.55   | 0.61 |
| Clinico-pathological factors (CP)                              | 0.63 | 0.60   | 0.66 |
| CP + tilts                                                     | 0.66 | 0.64   | 0.69 |

| eTable 9-B. AUC (IPCW) at 10 Years and Confidence Interval (CI) |      |        |      |
|-----------------------------------------------------------------|------|--------|------|
|                                                                 | AUC  | 95% CI |      |
| <b>OS</b>                                                       |      |        |      |
| Tils                                                            | 0.62 | 0.59   | 0.65 |
| Clinico-pathological factors (CP)                               | 0.71 | 0.68   | 0.74 |
| CP + tils                                                       | 0.75 | 0.72   | 0.78 |
| <b>RFS</b>                                                      |      |        |      |
| Tils                                                            | 0.62 | 0.59   | 0.65 |
| Clinico-pathological factors (CP)                               | 0.68 | 0.65   | 0.71 |
| CP + tils                                                       | 0.72 | 0.69   | 0.74 |
| <b>DDFS</b>                                                     |      |        |      |
| Tils                                                            | 0.63 | 0.60   | 0.66 |
| Clinico-pathological factors (CP)                               | 0.70 | 0.67   | 0.73 |
| CP + tils                                                       | 0.74 | 0.71   | 0.77 |
| <b>DRFS</b>                                                     |      |        |      |
| Tils                                                            | 0.63 | 0.60   | 0.66 |
| Clinico-pathological factors (CP)                               | 0.71 | 0.68   | 0.74 |
| CP + tils                                                       | 0.75 | 0.72   | 0.78 |
| <b>IBCFS</b>                                                    |      |        |      |
| Tils                                                            | 0.60 | 0.57   | 0.63 |
| Clinico-pathological factors (CP)                               | 0.65 | 0.62   | 0.68 |
| CP + tils                                                       | 0.68 | 0.66   | 0.71 |
| <b>IDFS</b>                                                     |      |        |      |
| Tils                                                            | 0.60 | 0.57   | 0.63 |
| Clinico-pathological factors (CP)                               | 0.64 | 0.62   | 0.67 |
| CP + tils                                                       | 0.68 | 0.65   | 0.71 |

## 10. Cross-Validation Study

We make a cross-validation analysis to assess how the results of our statistical analysis will generalize to an independent data set. In practice, it is a resampling method. One by one, each study is isolated, while the remaining studies are used to estimate the baseline risk. We then look at the concordance between the 5 year-survival predicted by the model and the actual 5 year-survival of the study. The results are presented in the form of graphs representing the observed results compared to the predicted results. A perfect match would be on the gray line in the center of the graph. This analysis allows to estimate how accurately this predictive model will perform in practice.

The clinicopathologic factors (age, number of positive lymph nodes, tumor size, histological grade, radiotherapy) and the tils are the adjustment factors.

Studies with less than 50 patients have been regrouped (Lyon, Padova, Genova, Göteborg)

**eFigure 10-A. Overall Survival Calibration Plots**

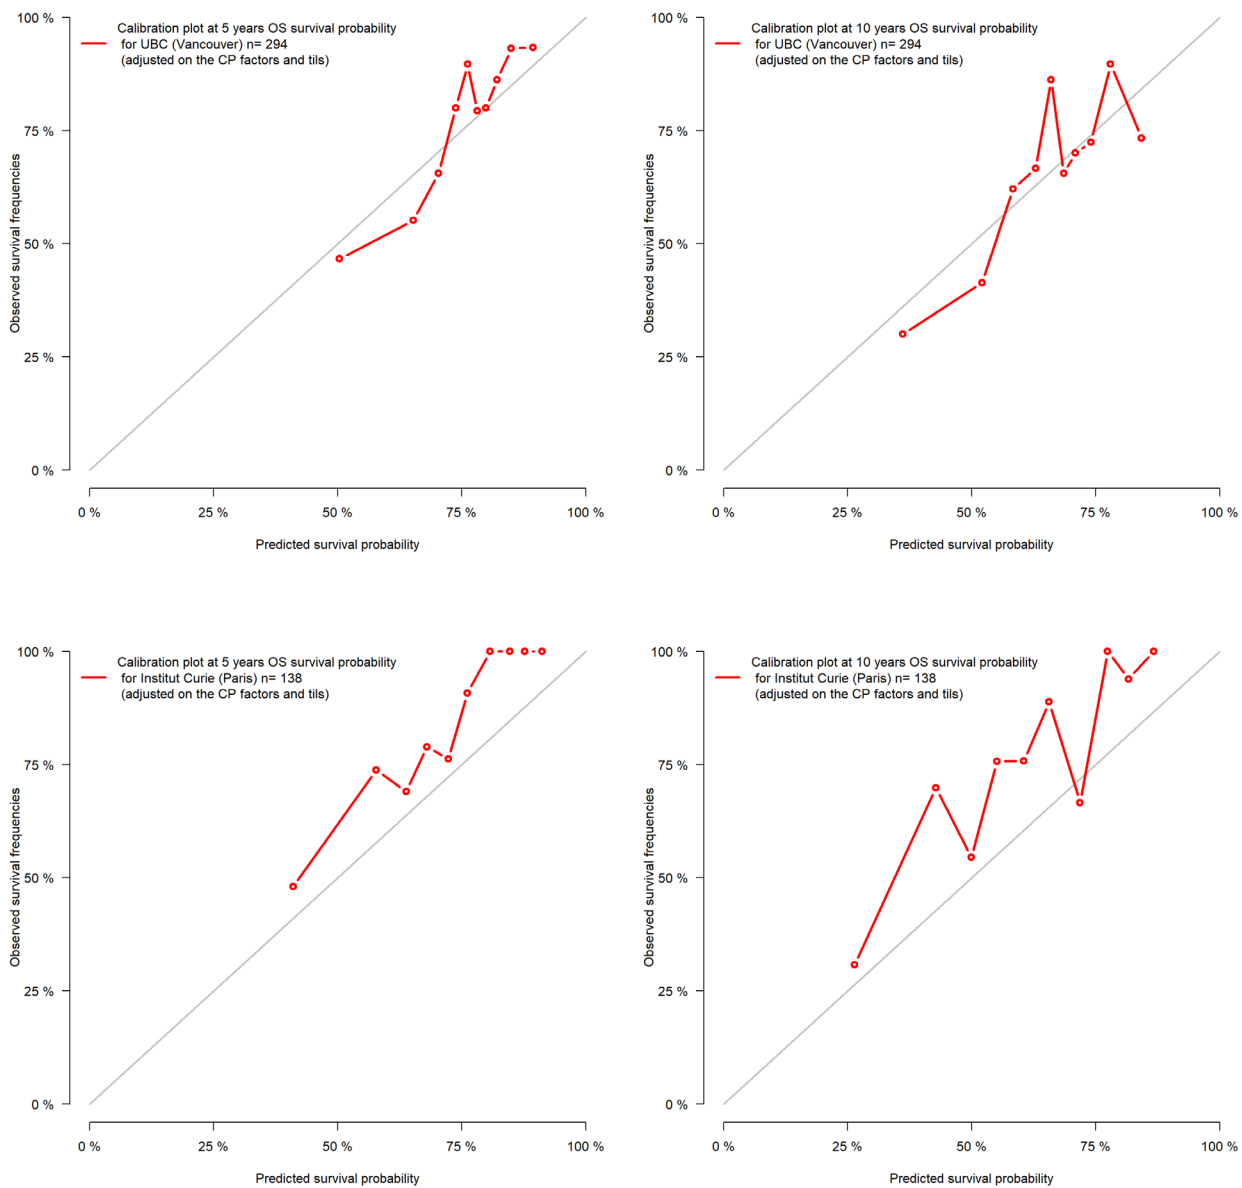

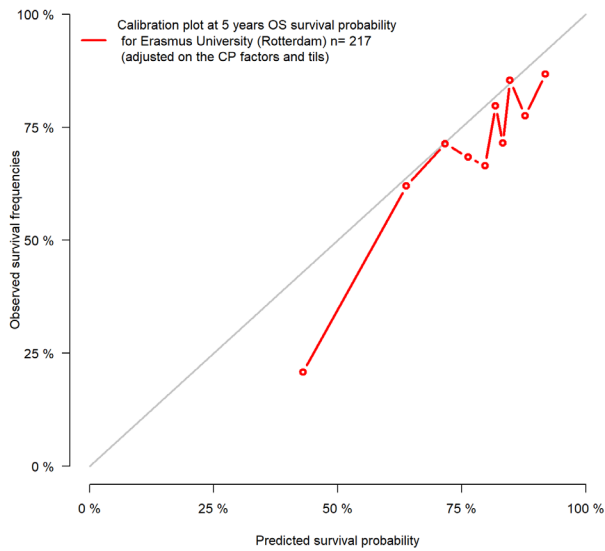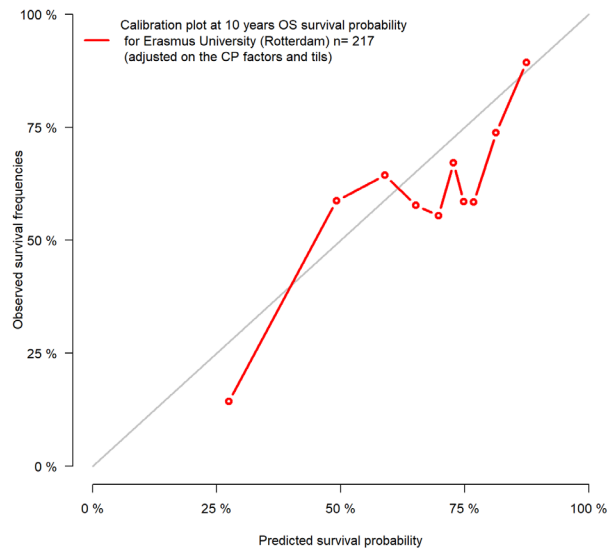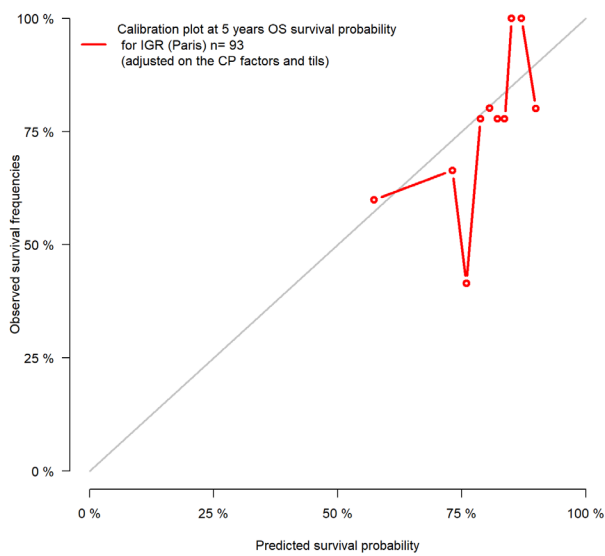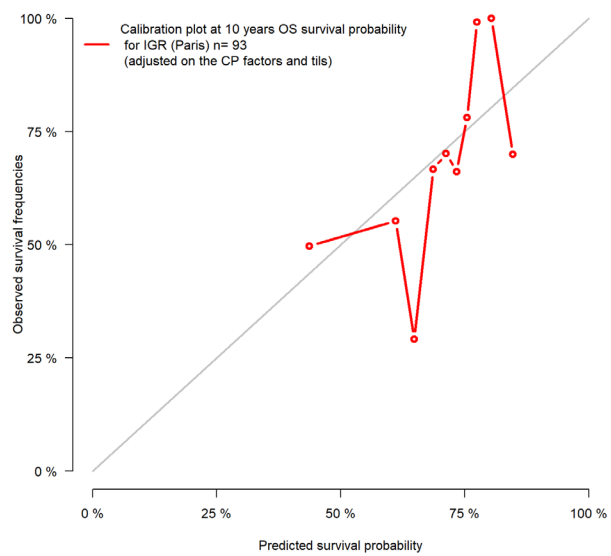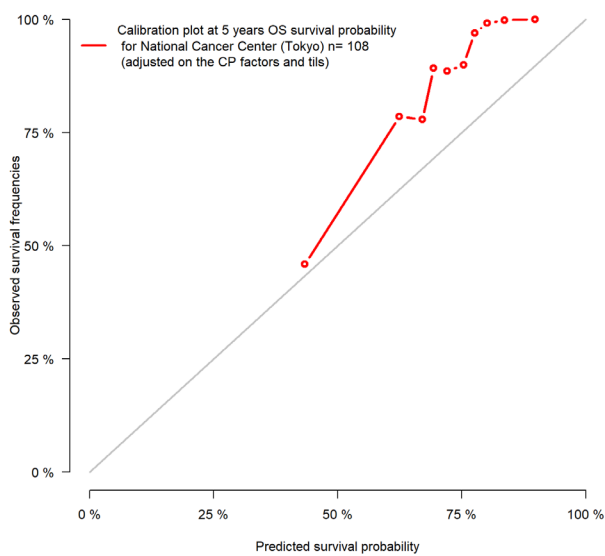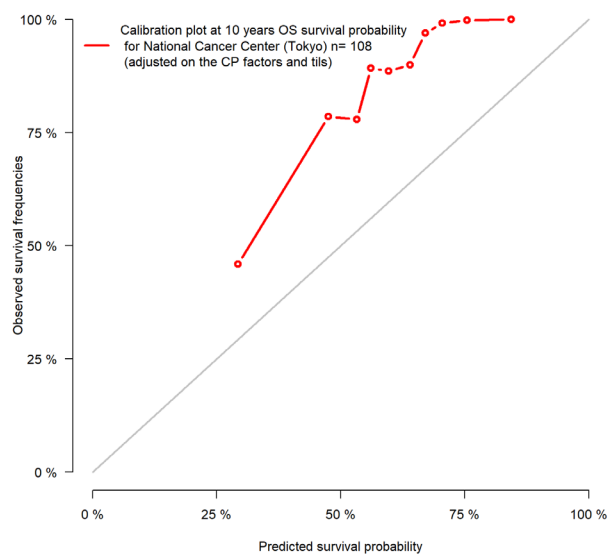



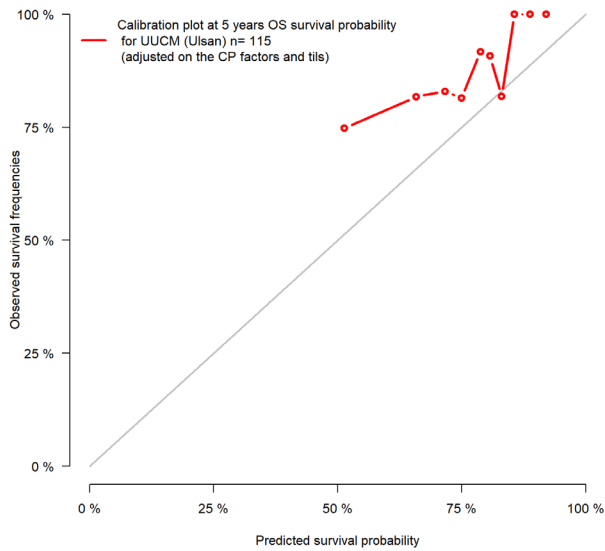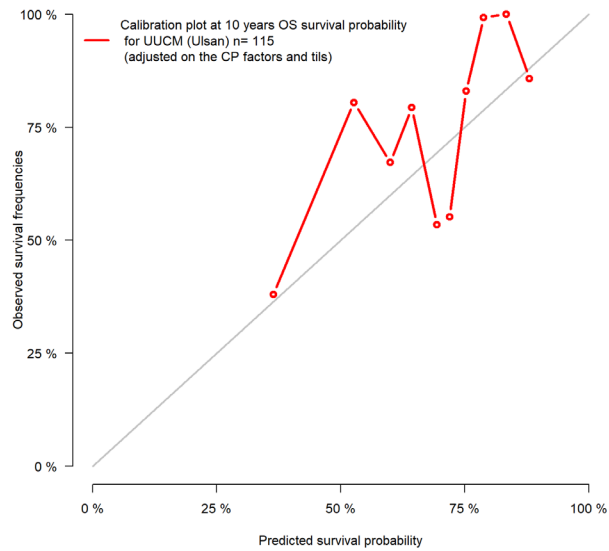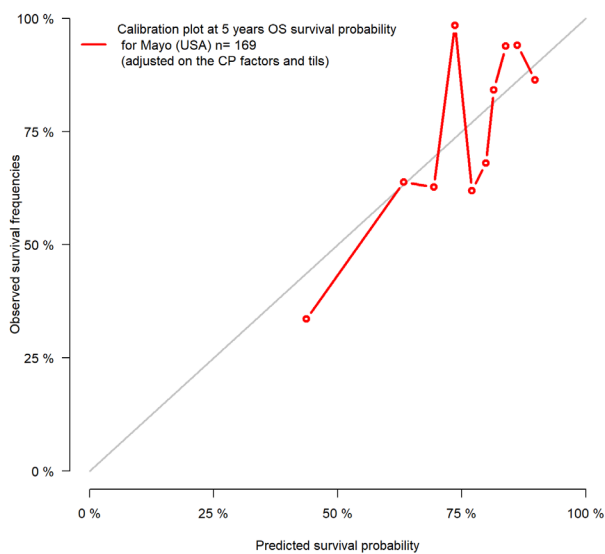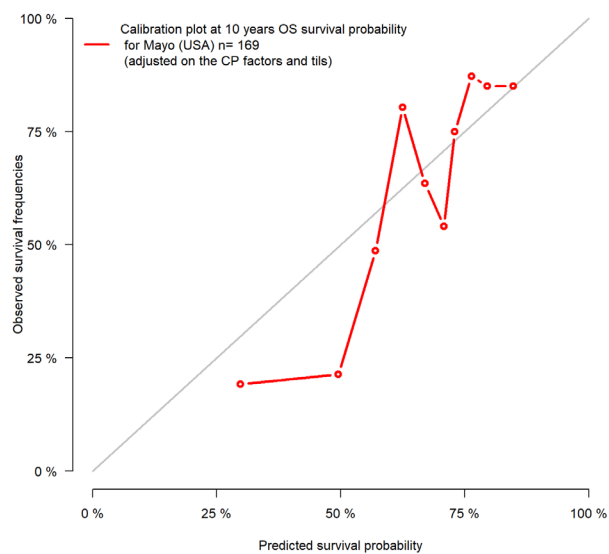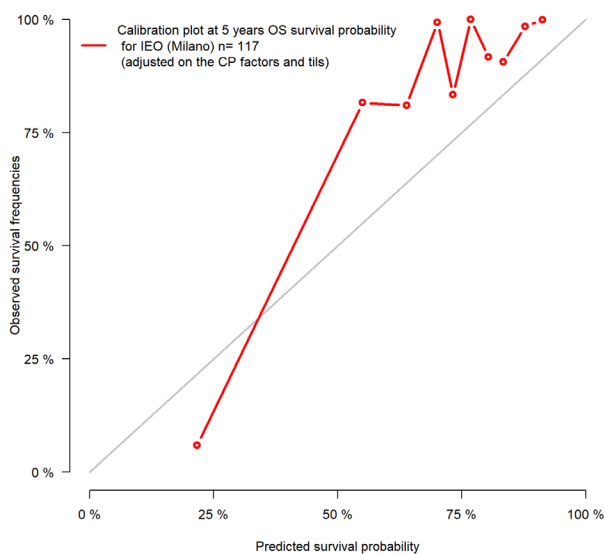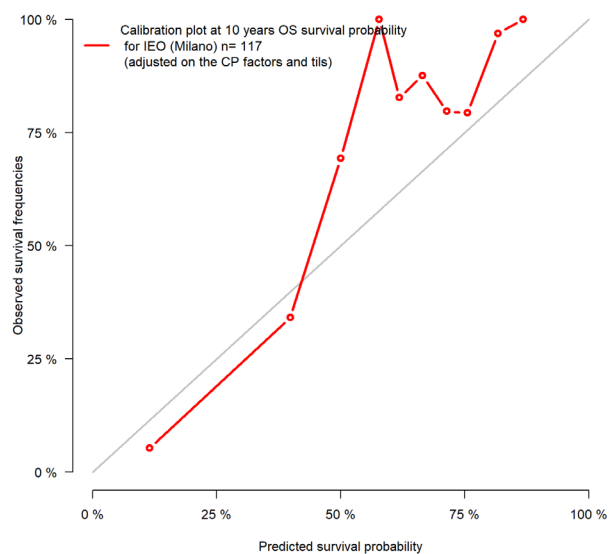

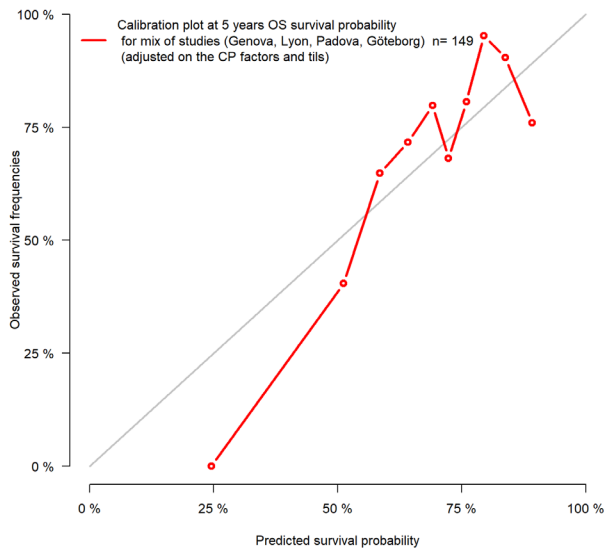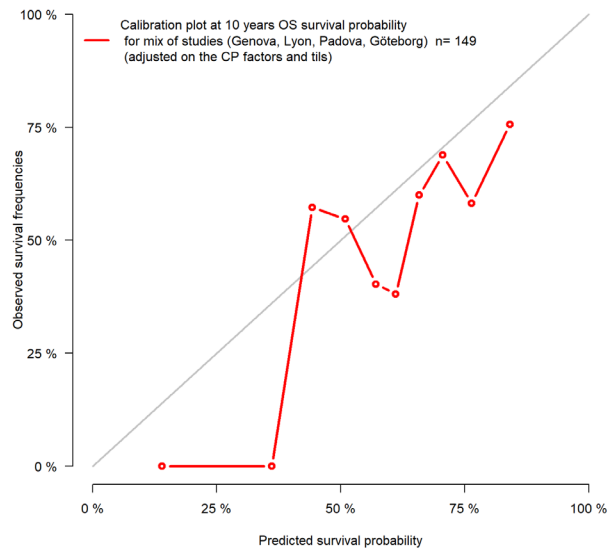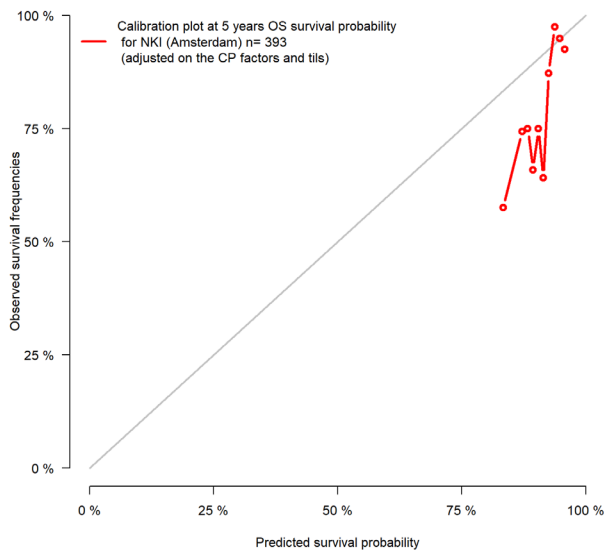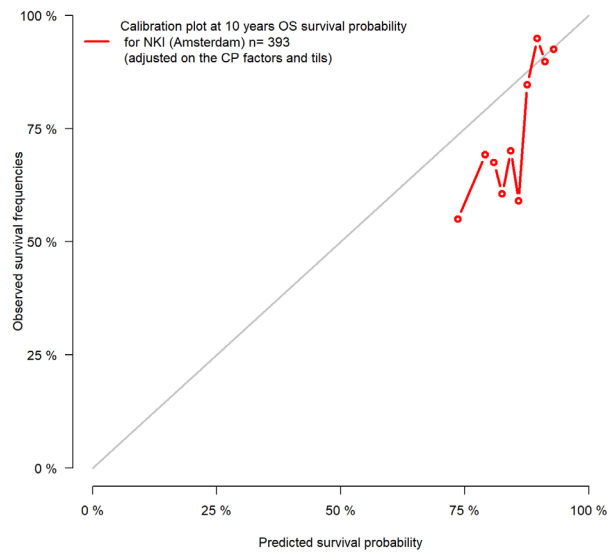

## eFigure 10-B. Recurrence-Free Survival Calibration Plots

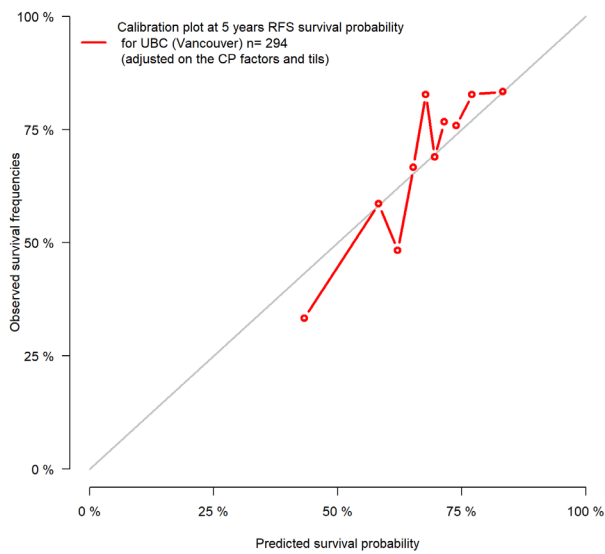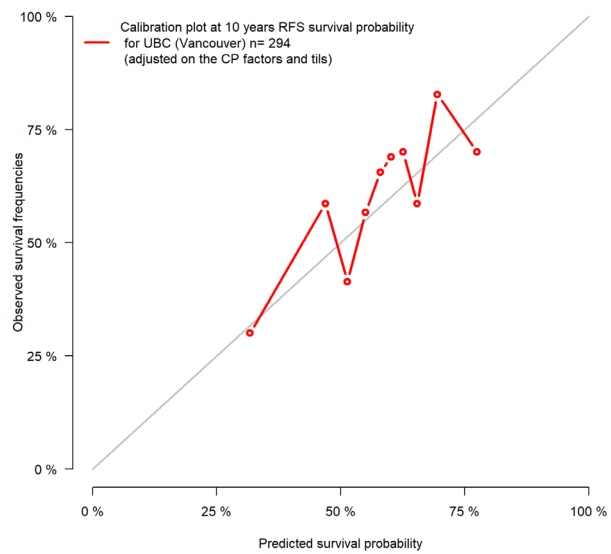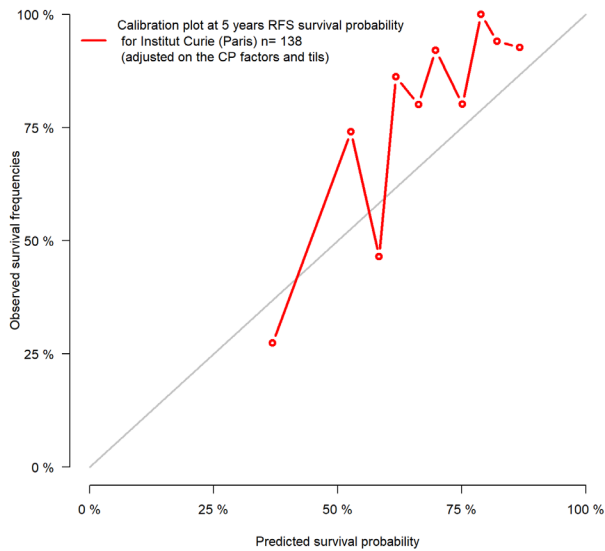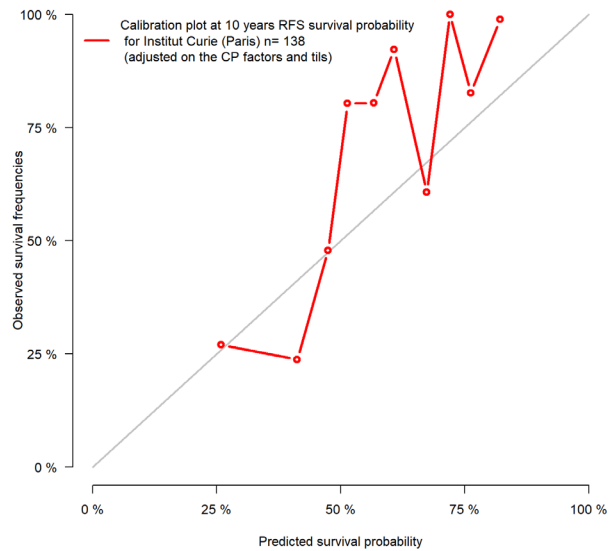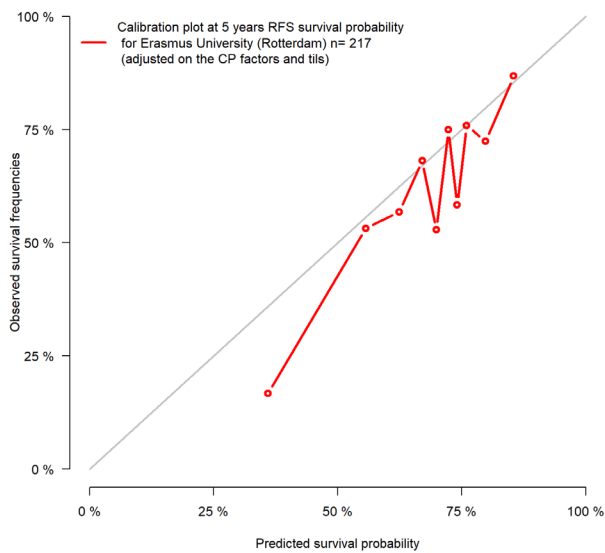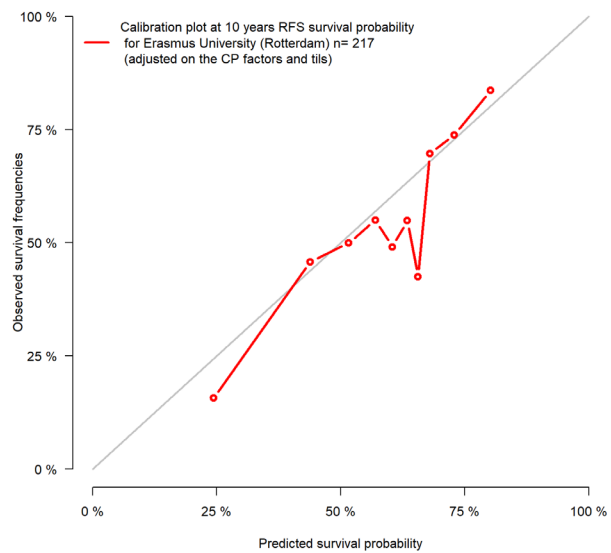

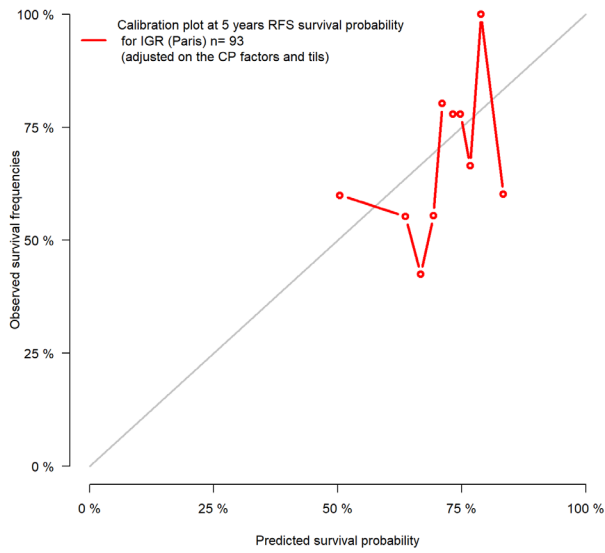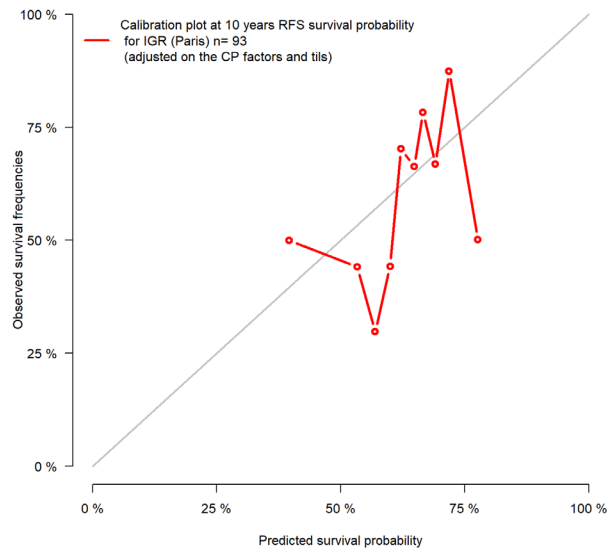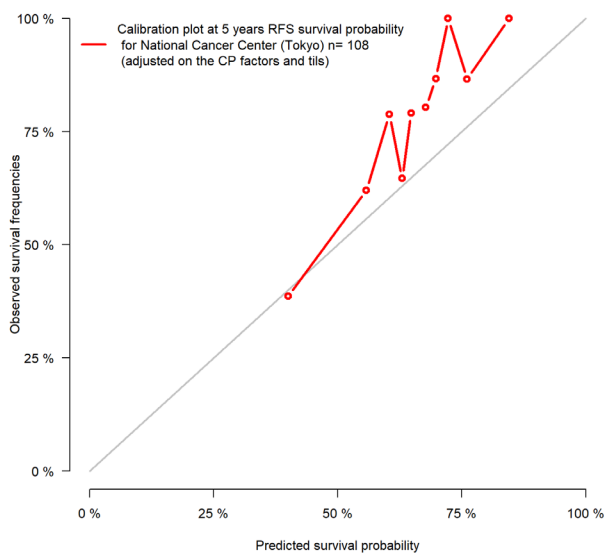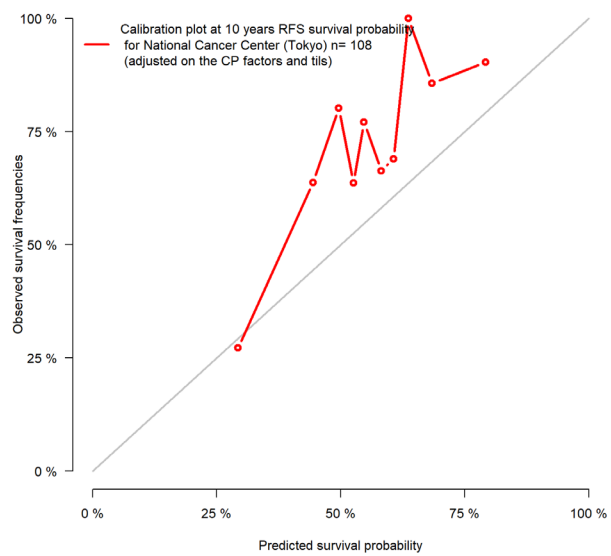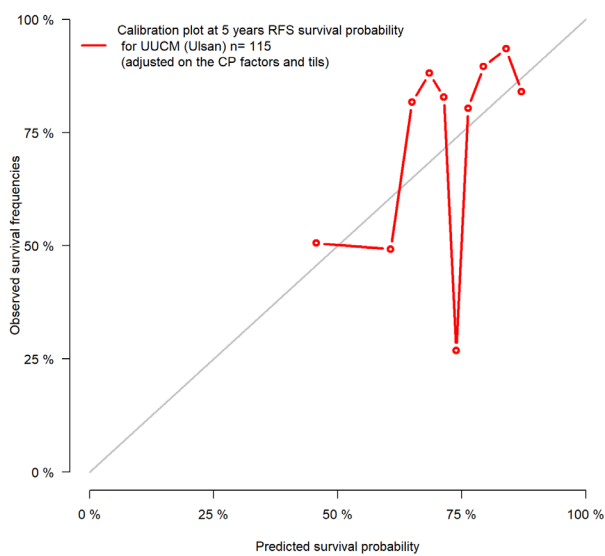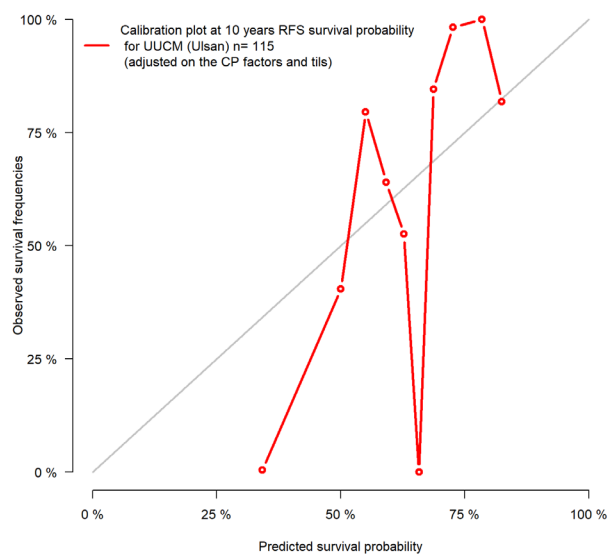

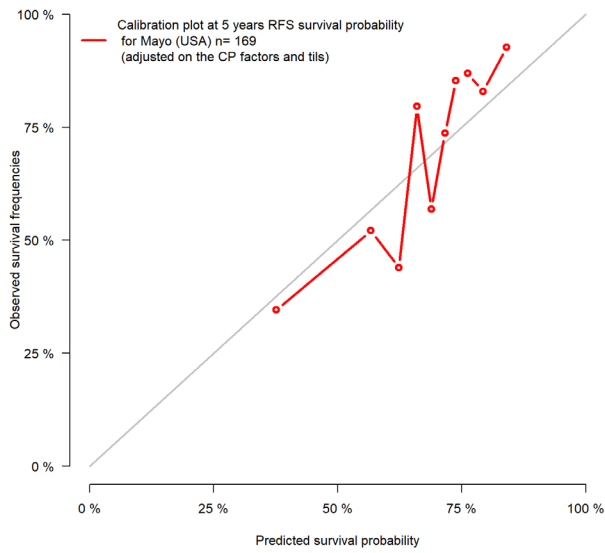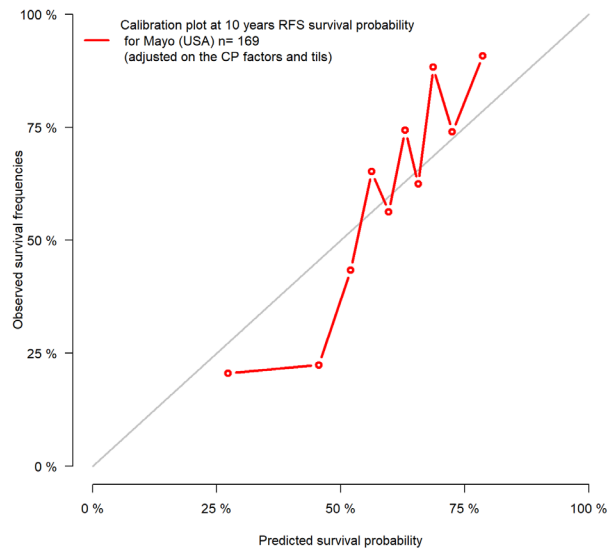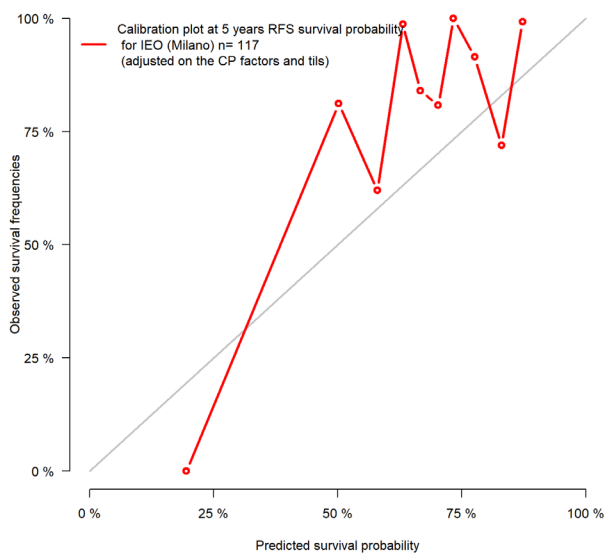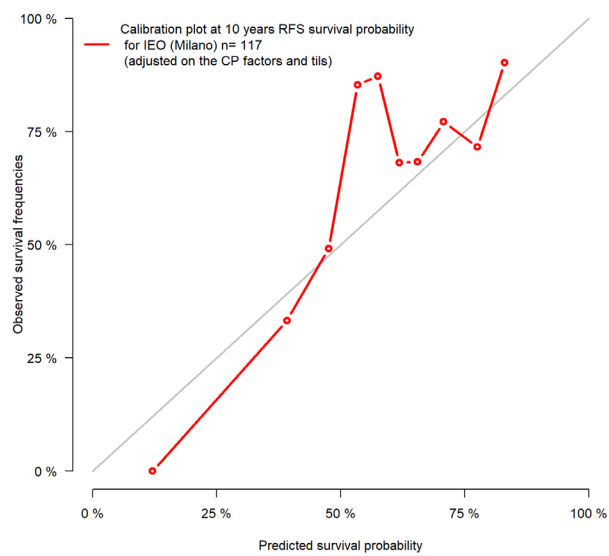

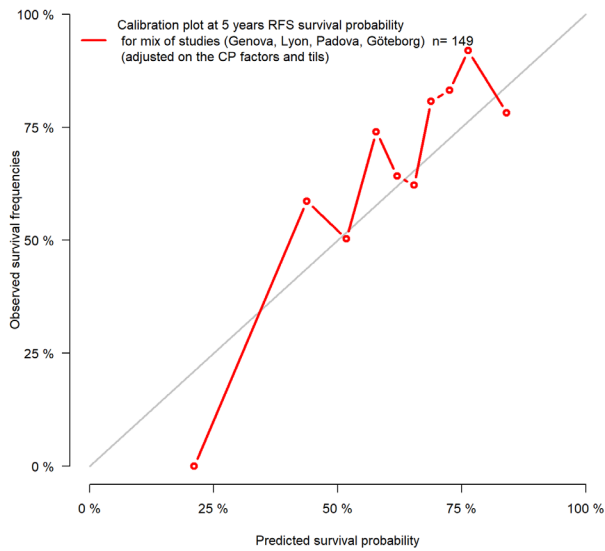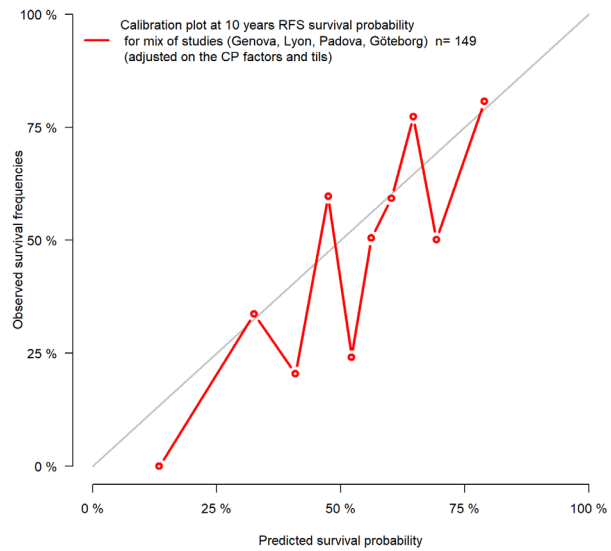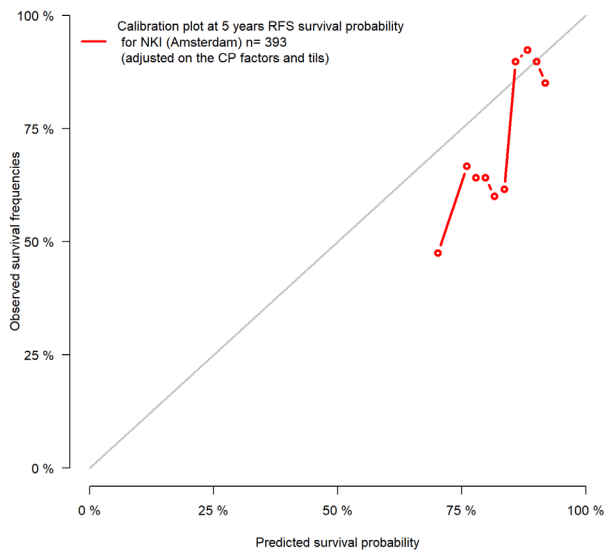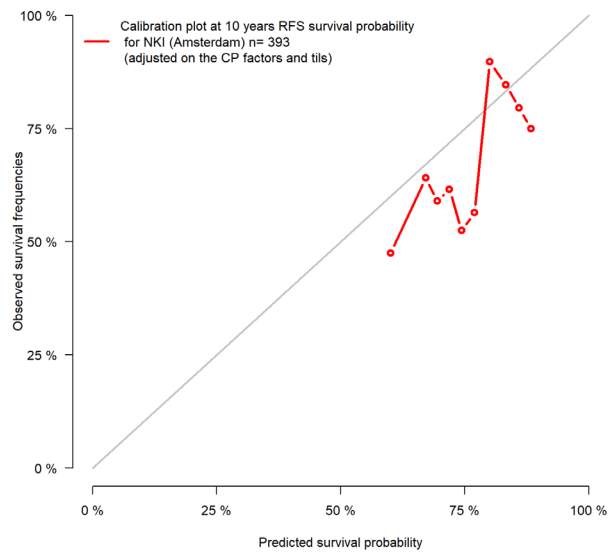

**eFigure 10-C. Distant-Disease Free Survival Calibration Plots**

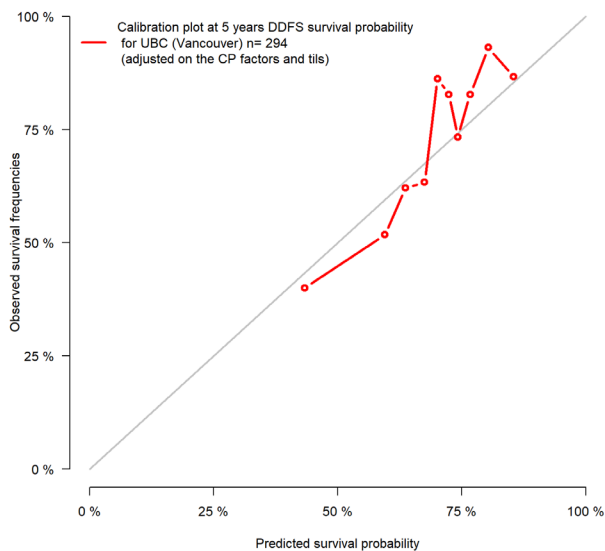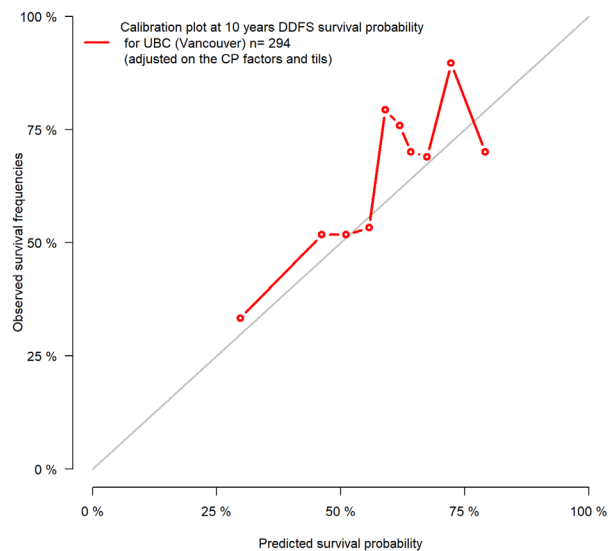

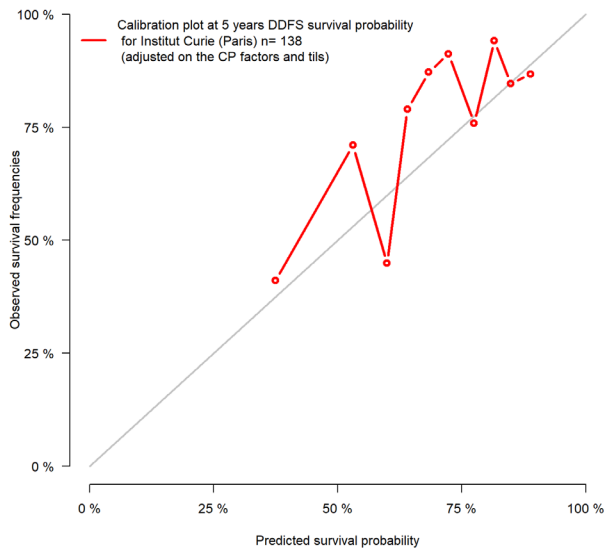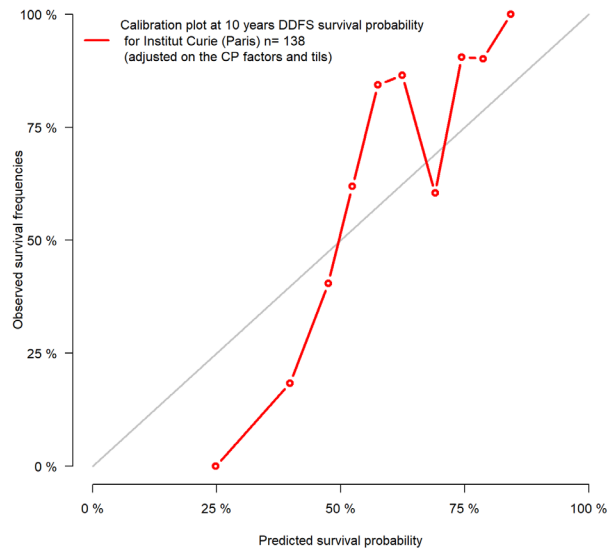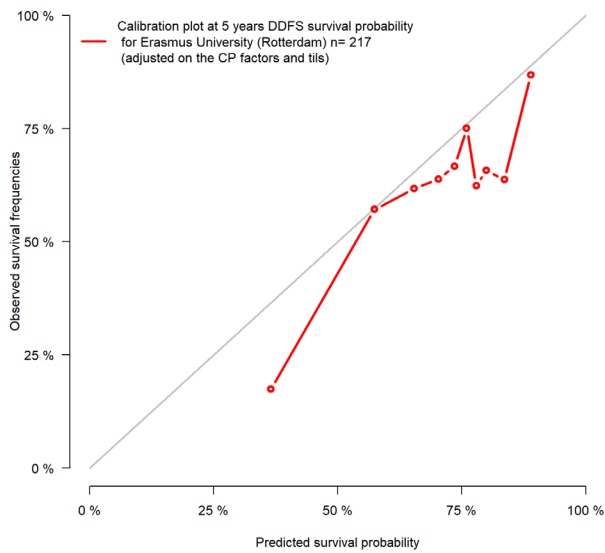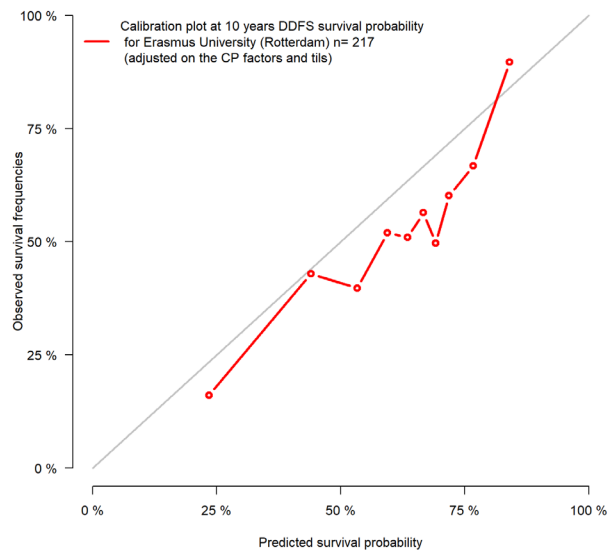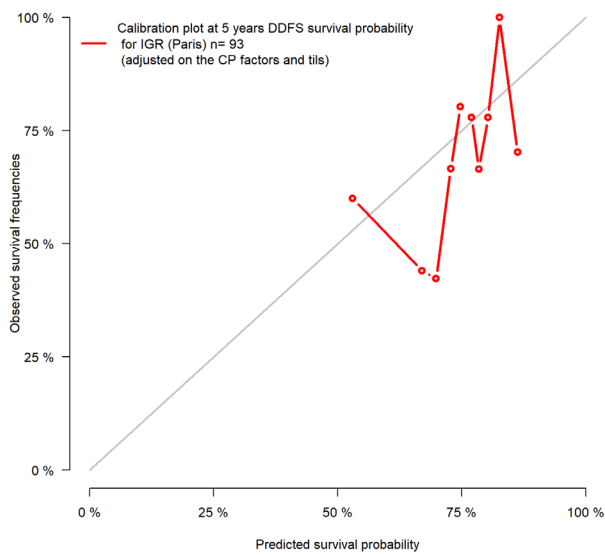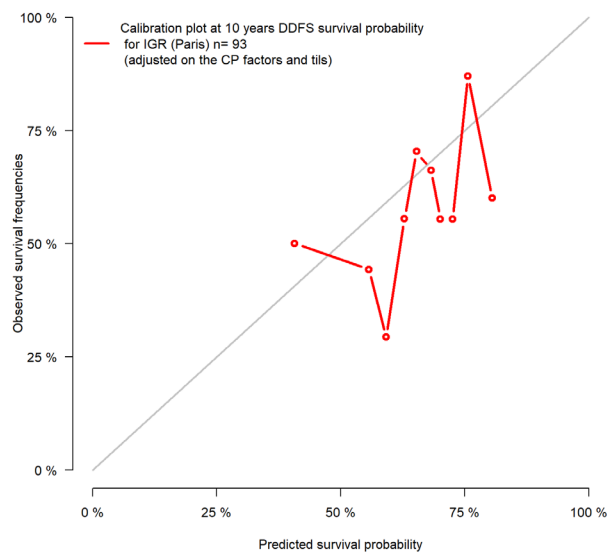

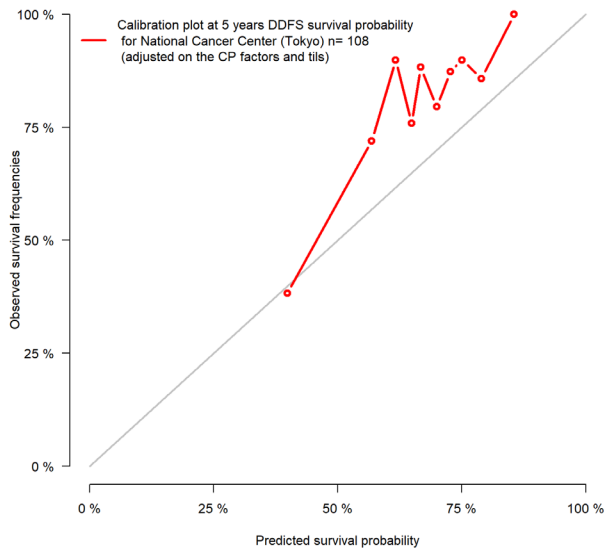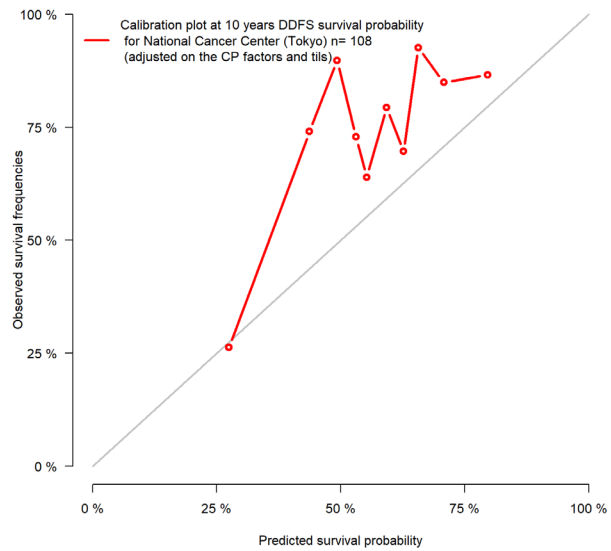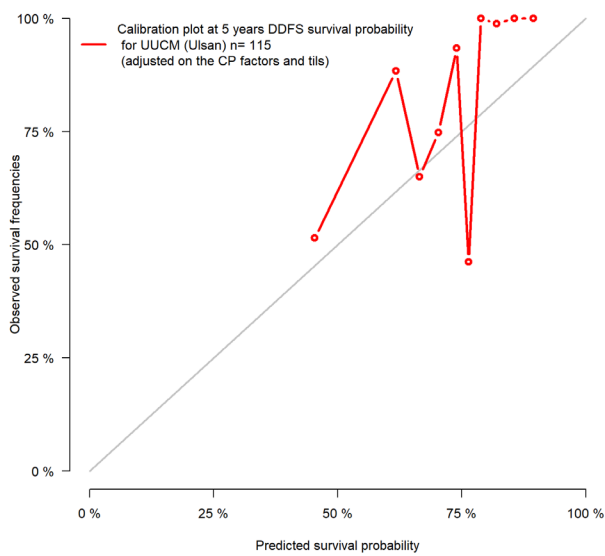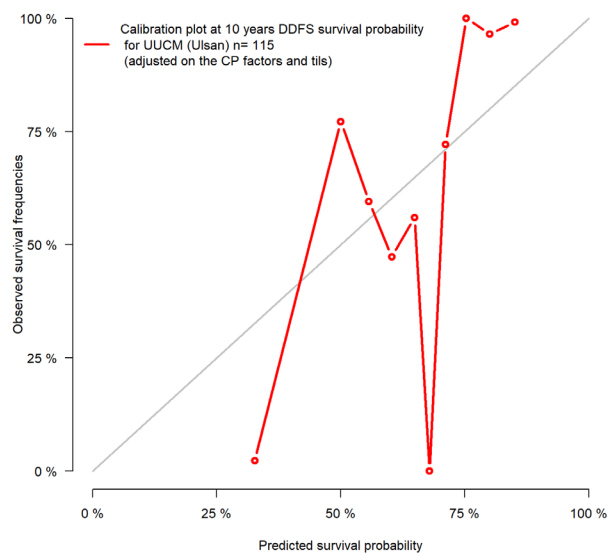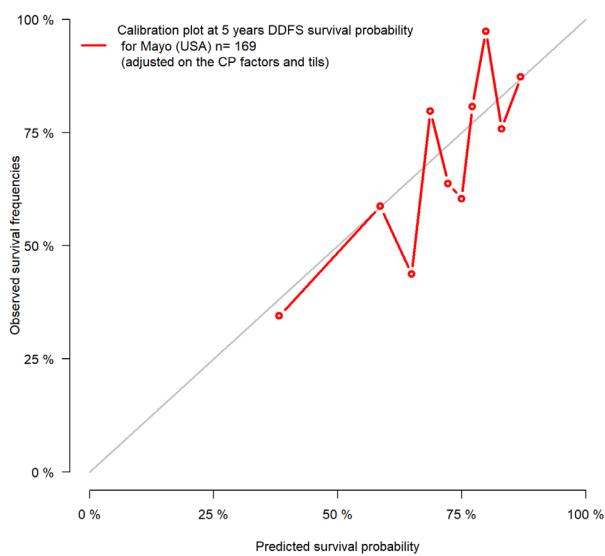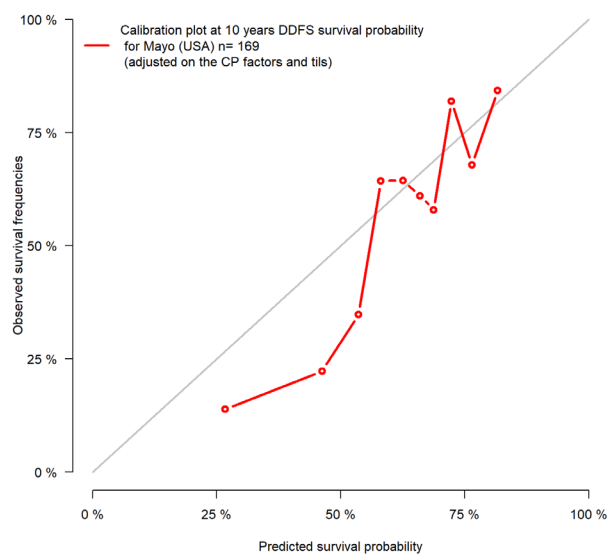



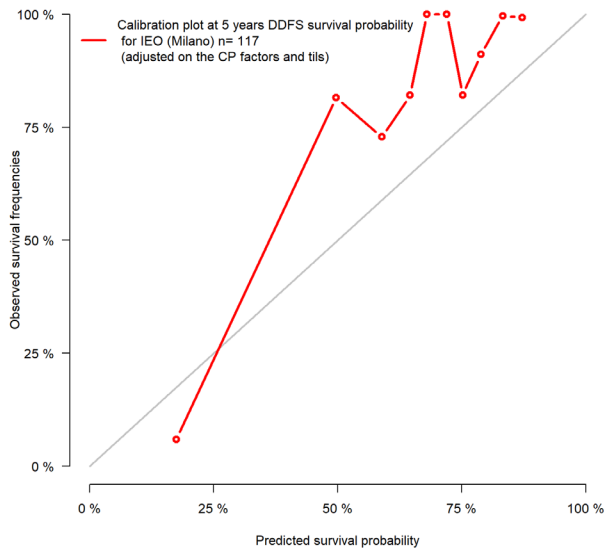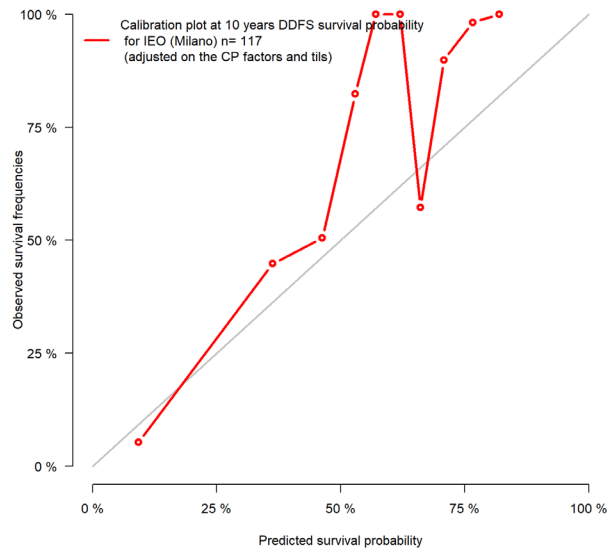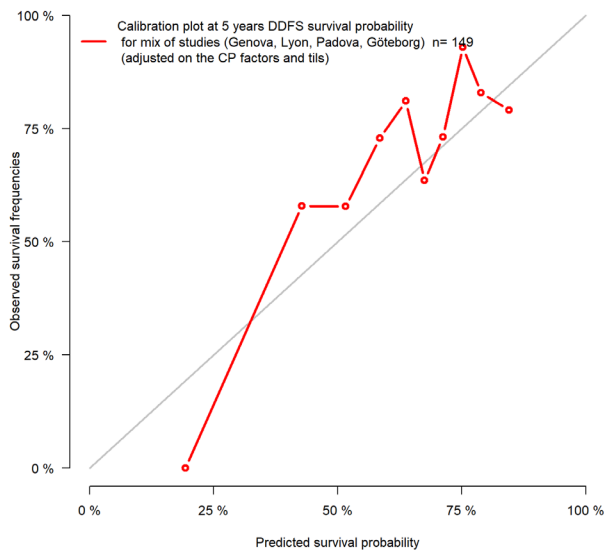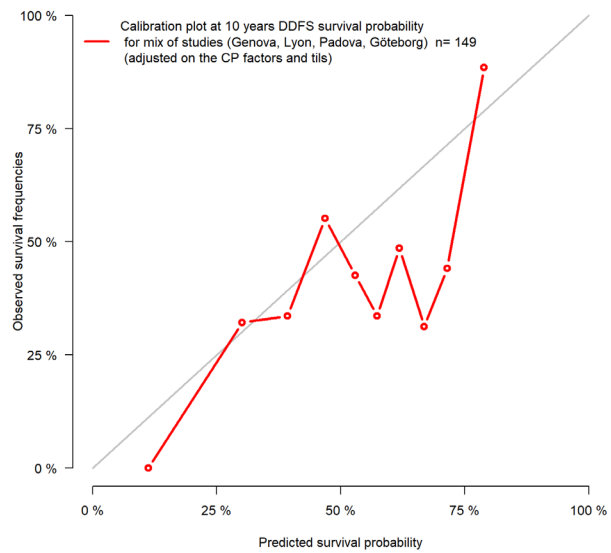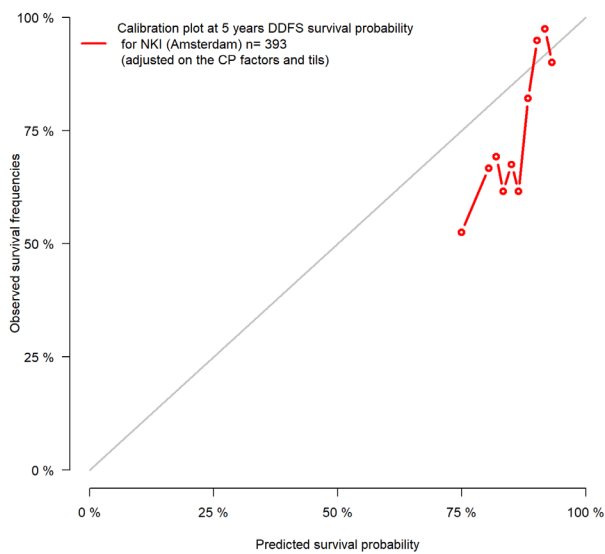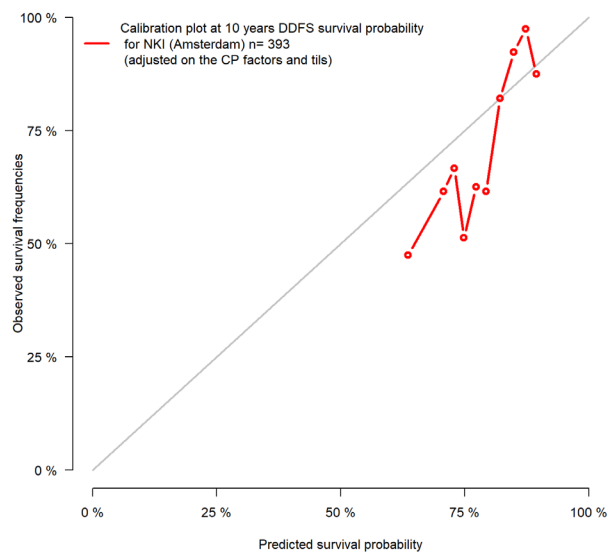

# eFigure 10-D. Invasive Disease-Free Survival Calibration Plots

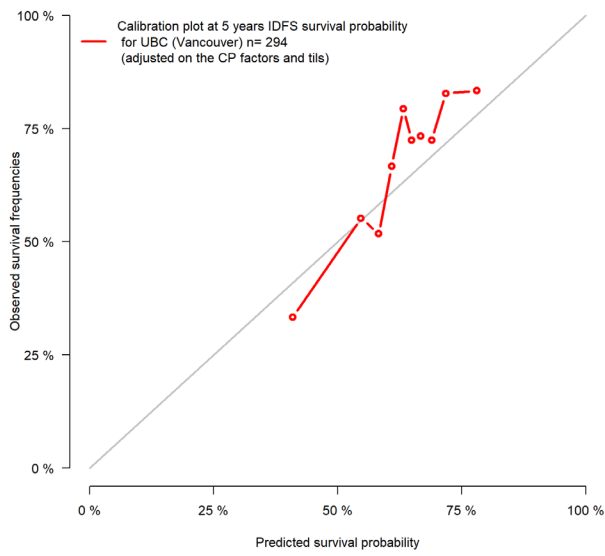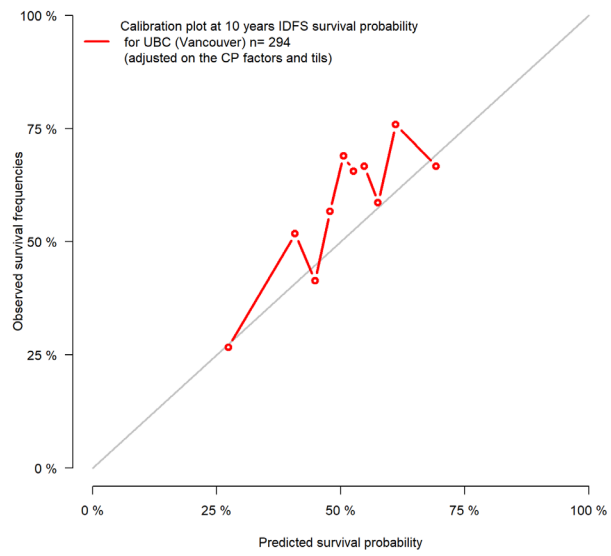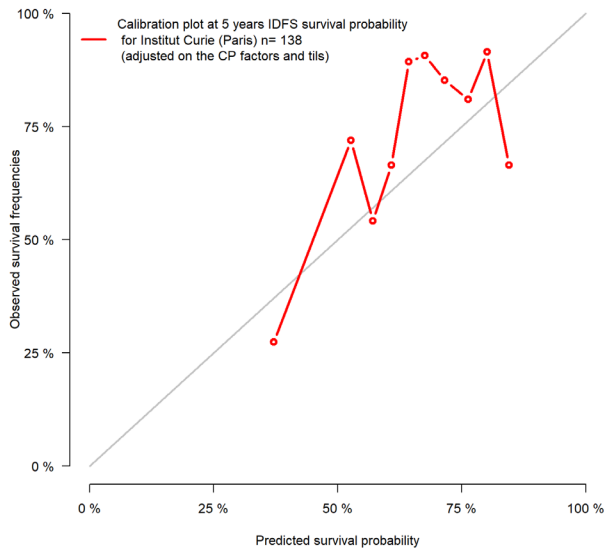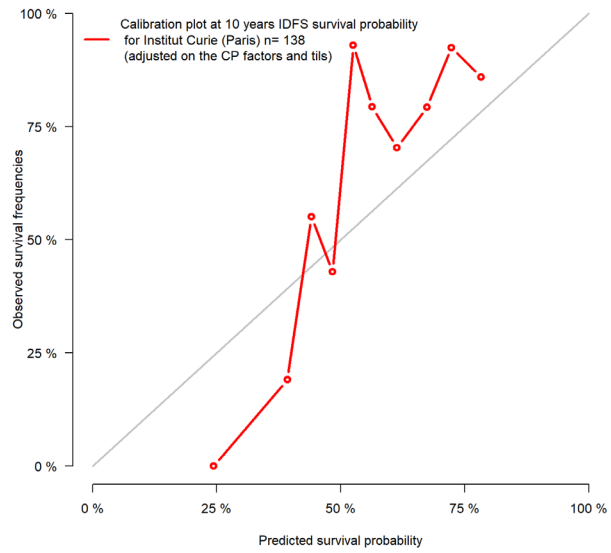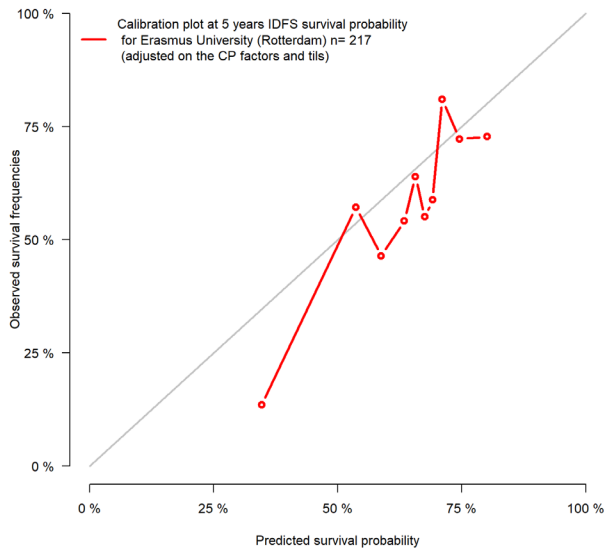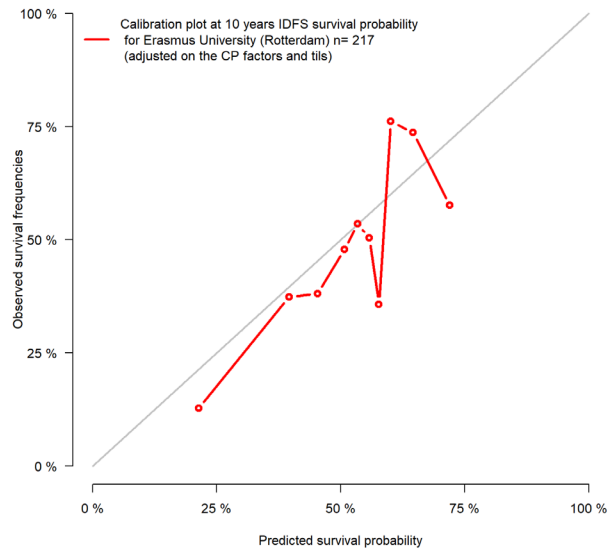

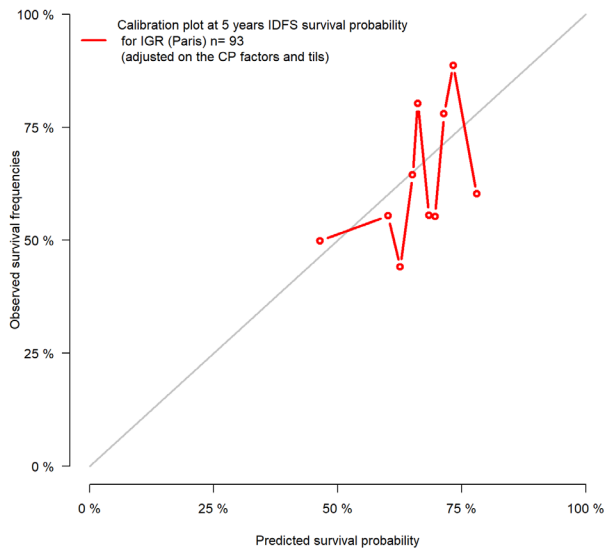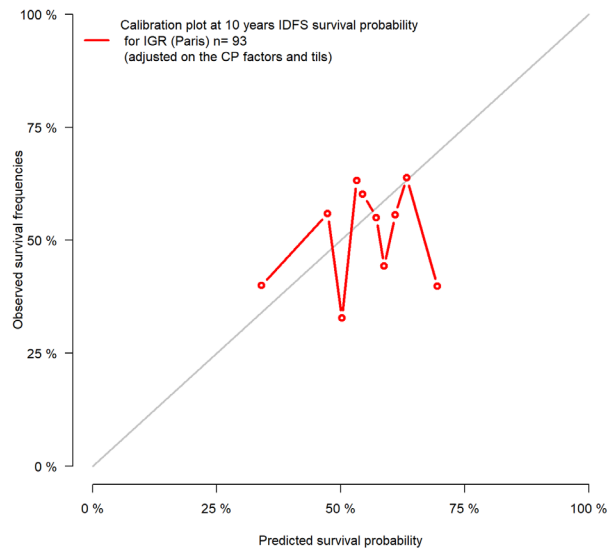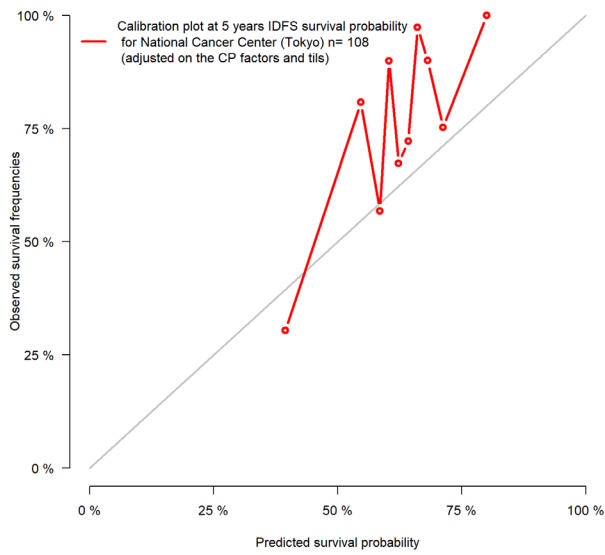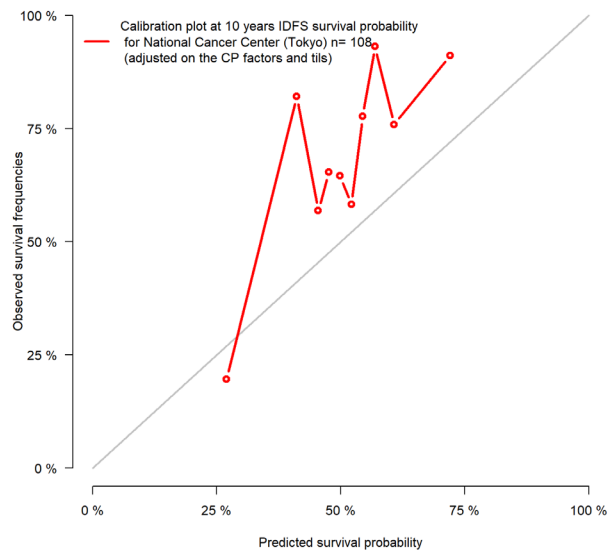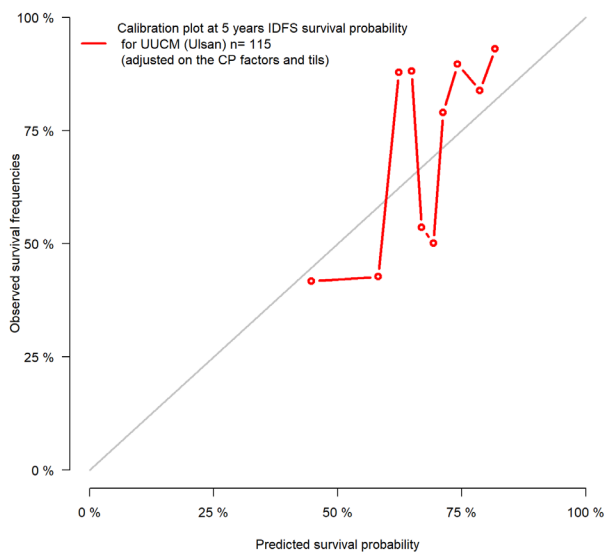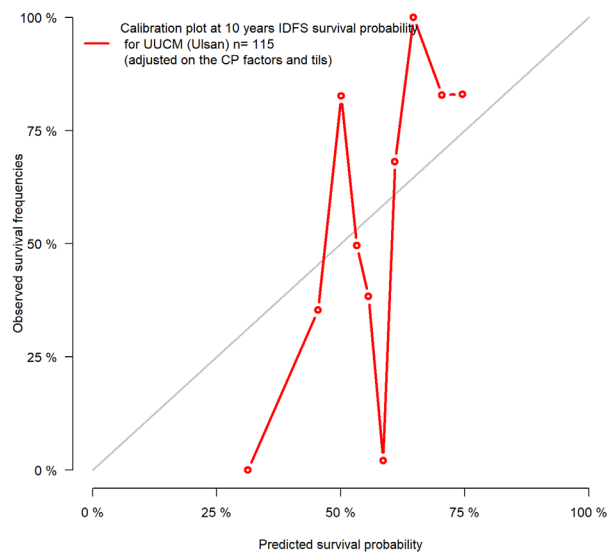

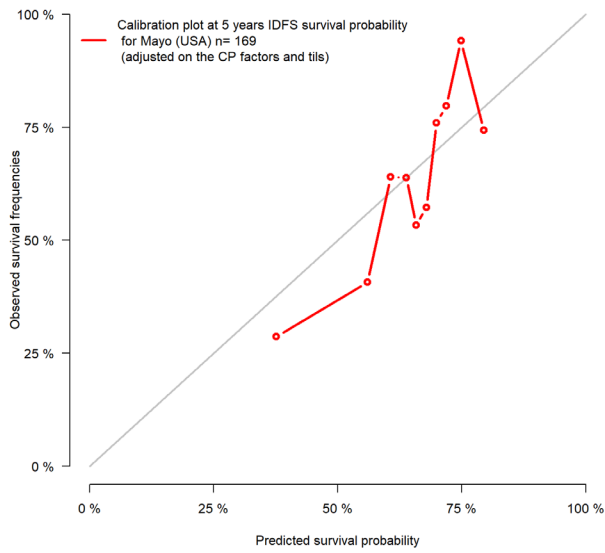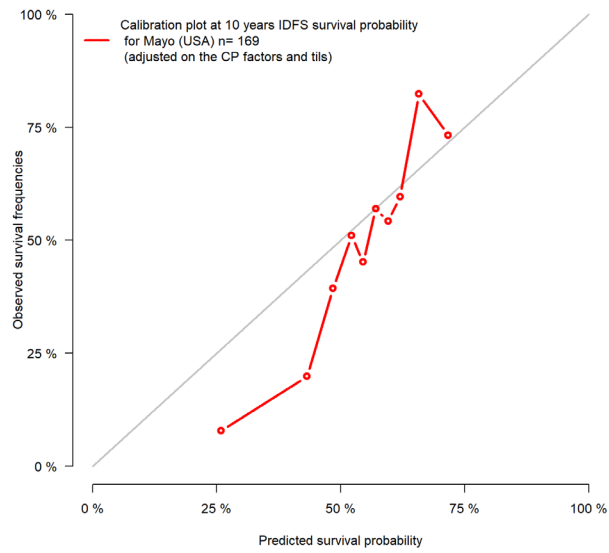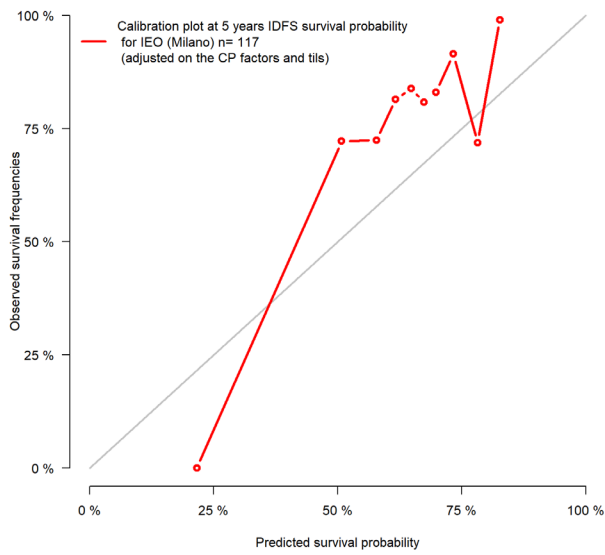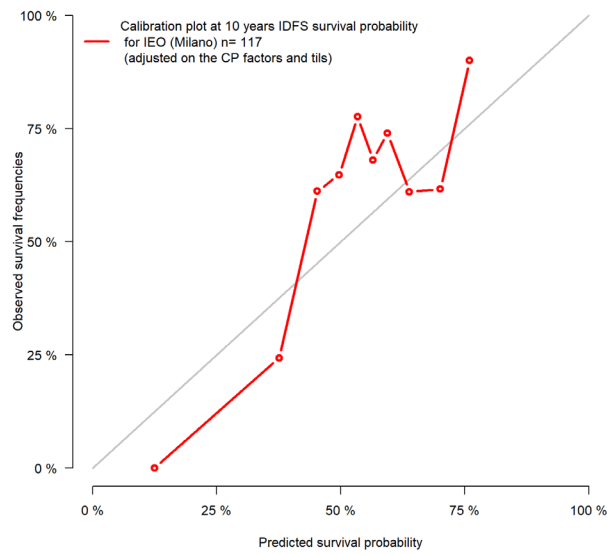

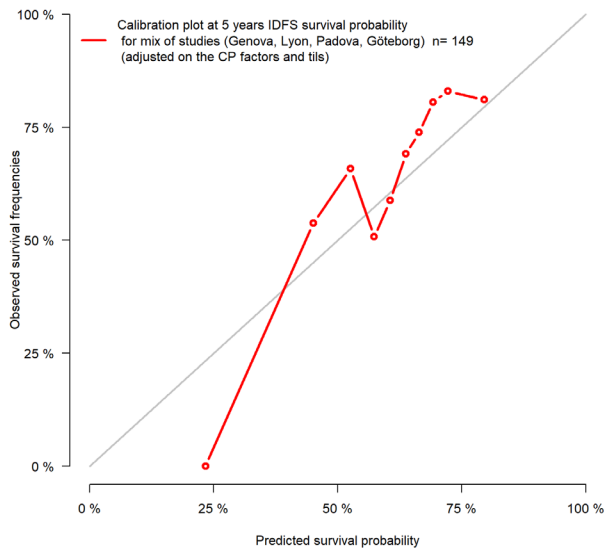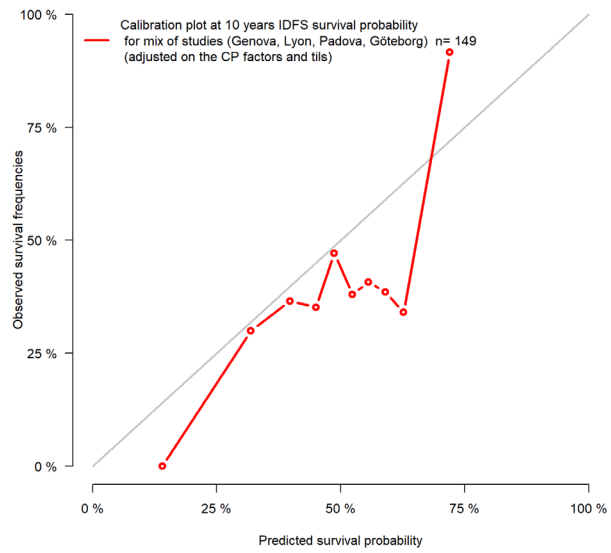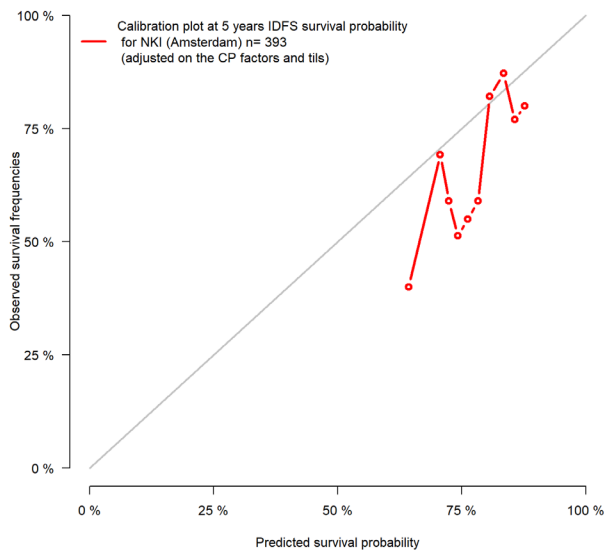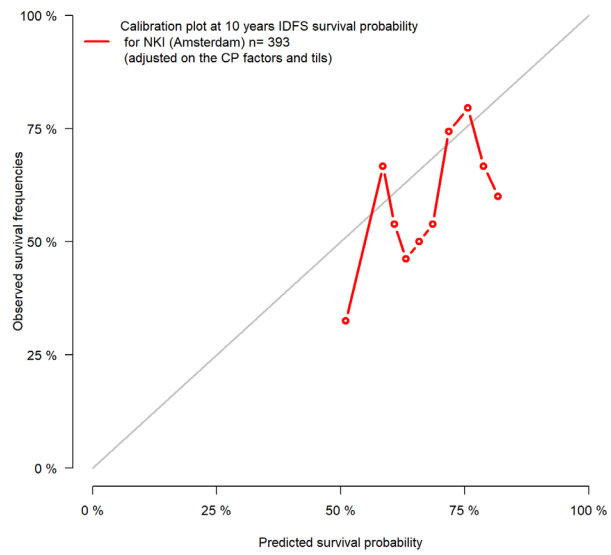

# eFigure 10-E. Invasive Breast Cancer–Free Survival Calibration Plots

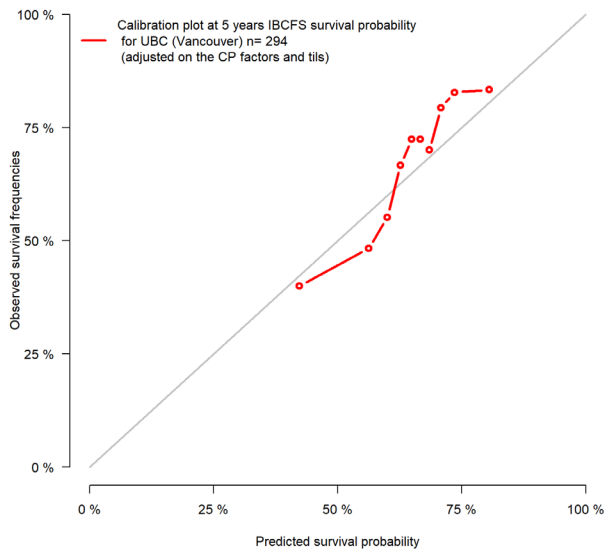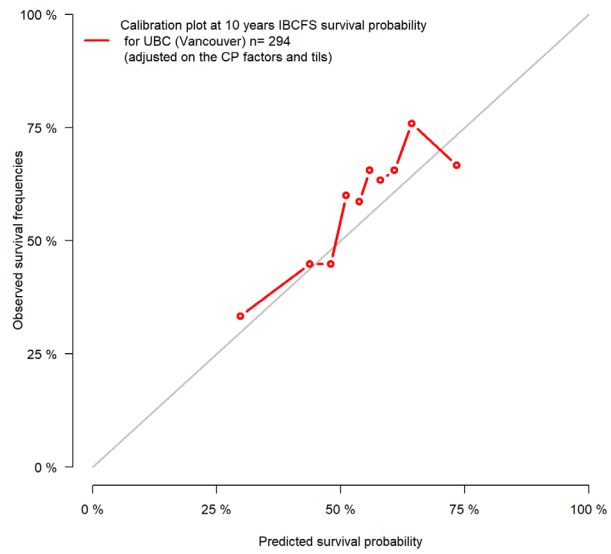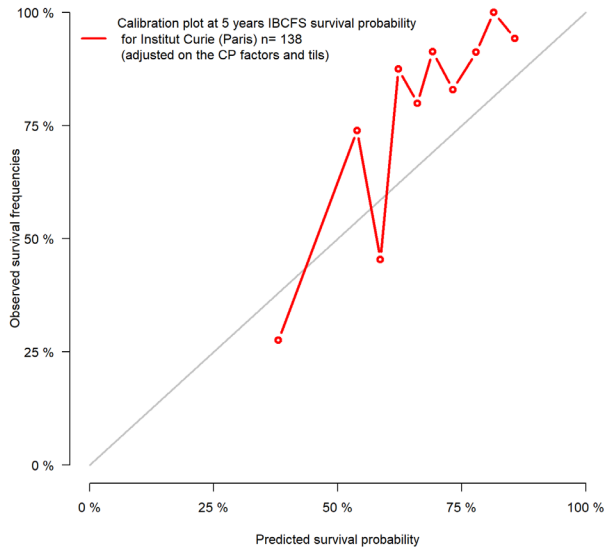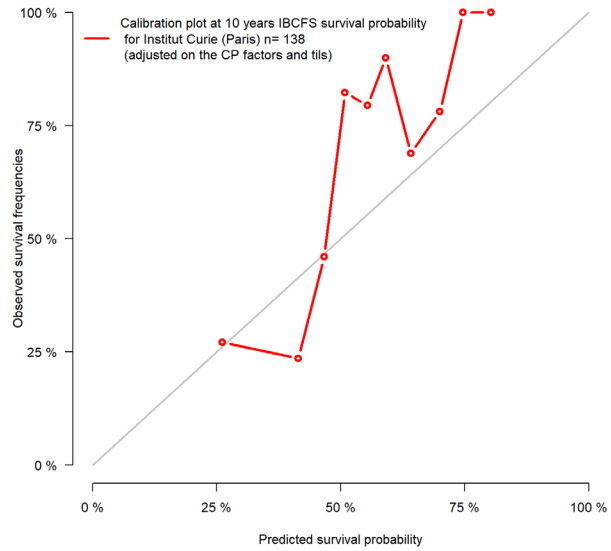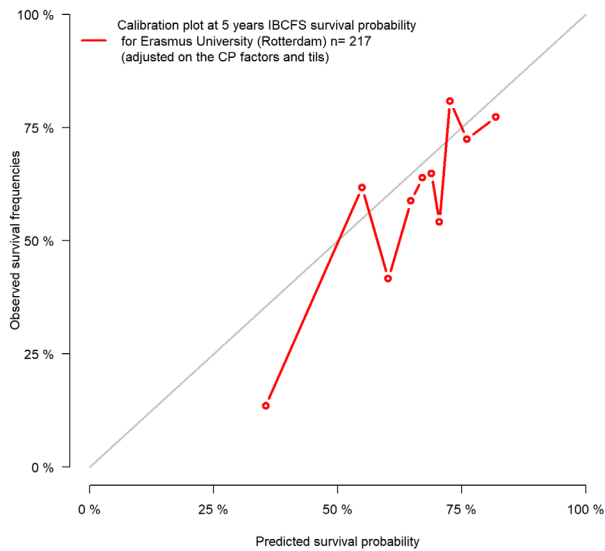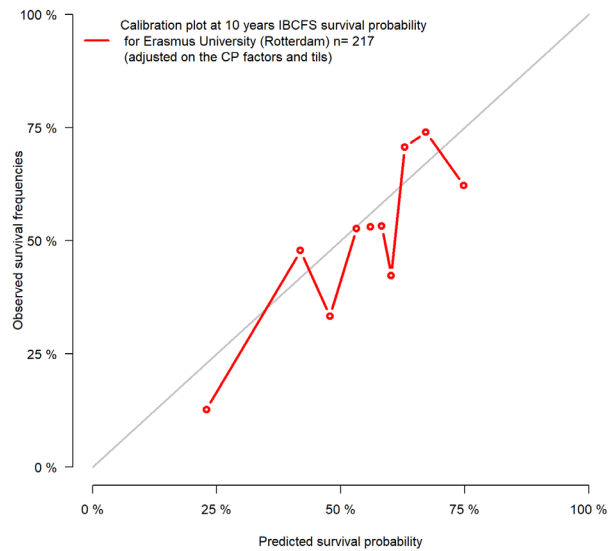

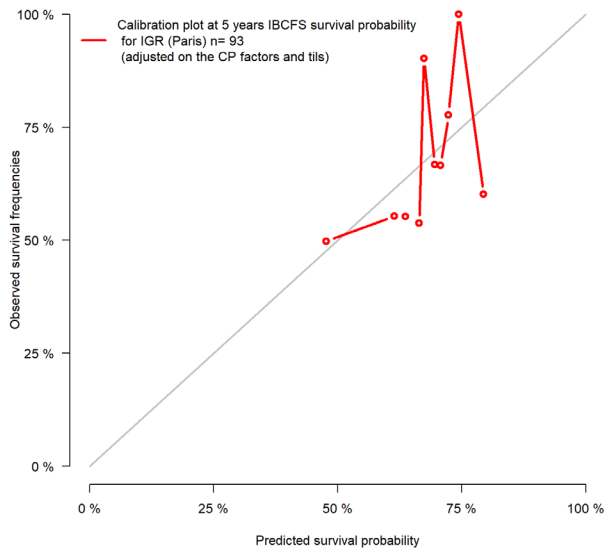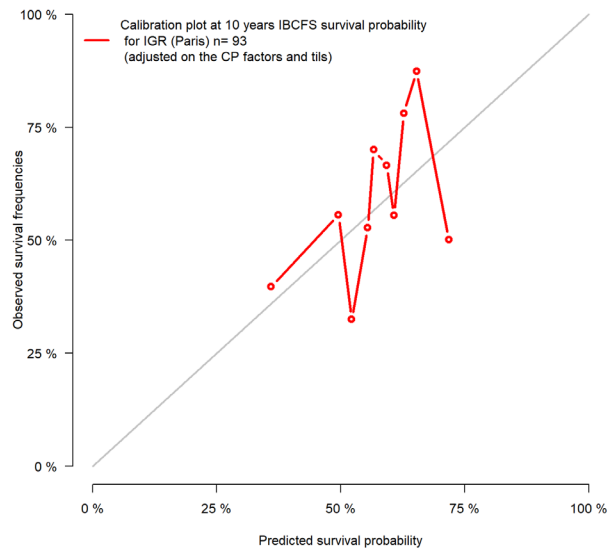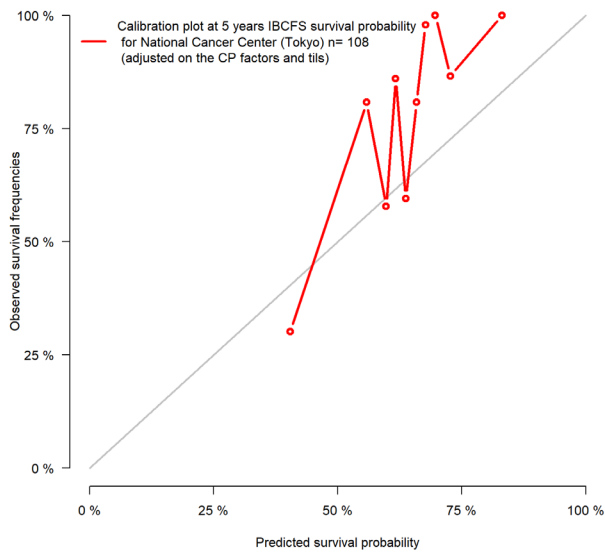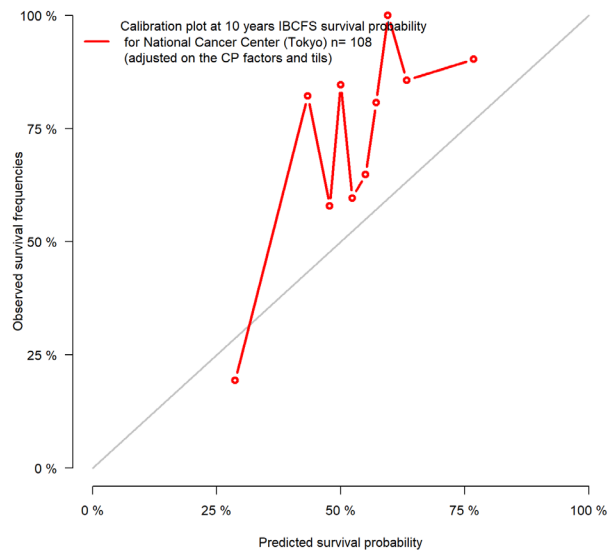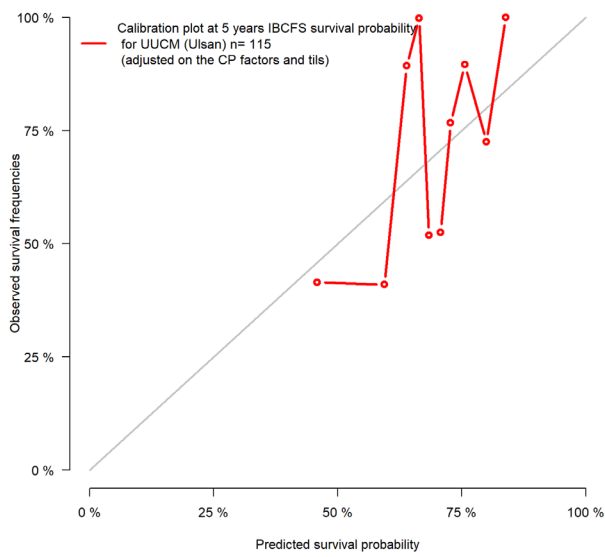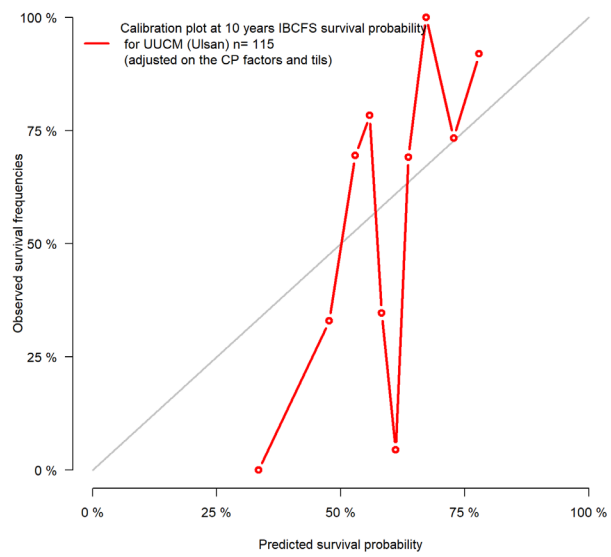

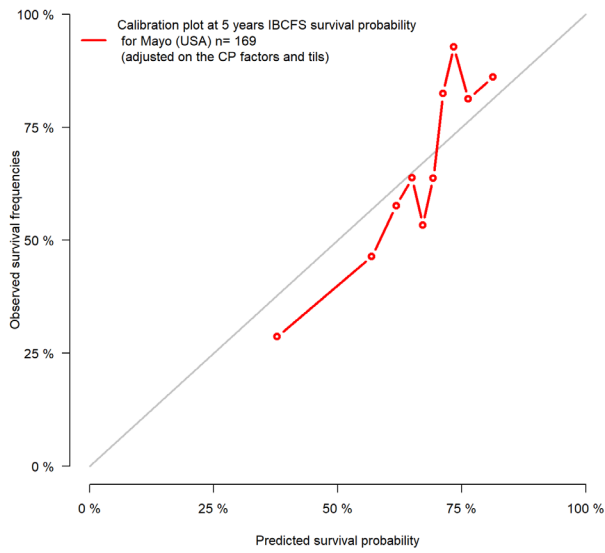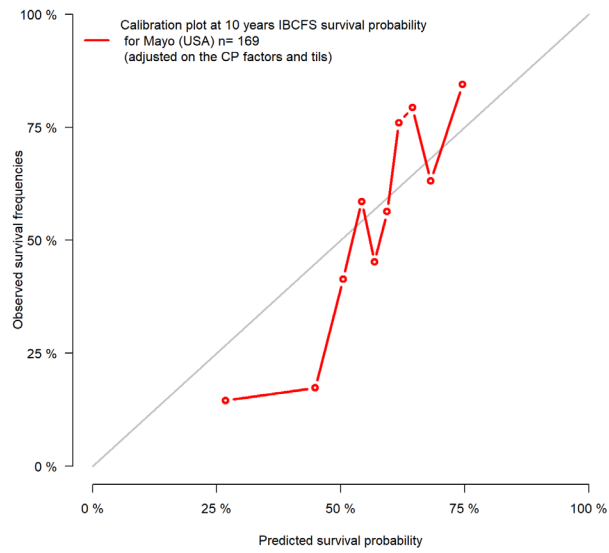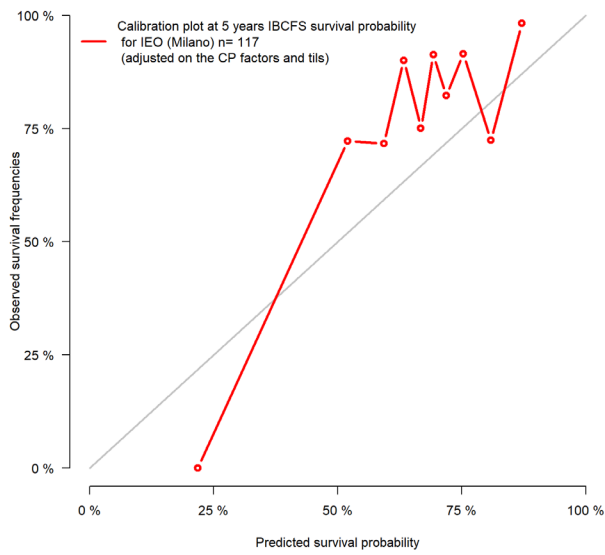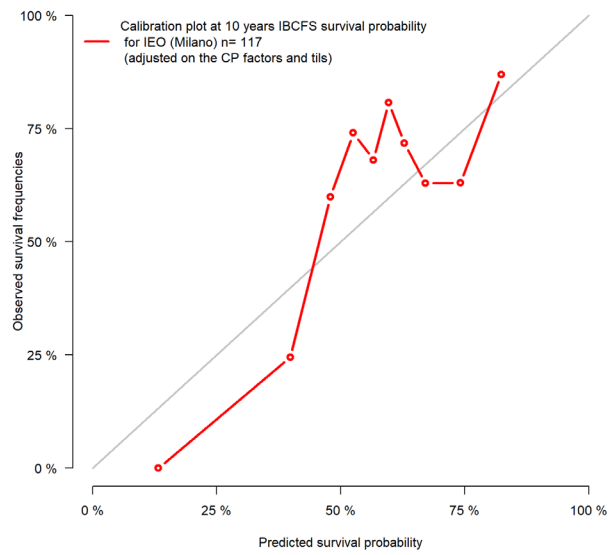



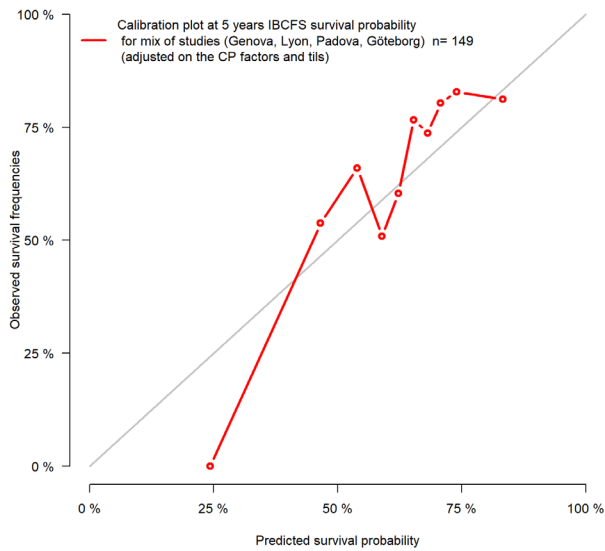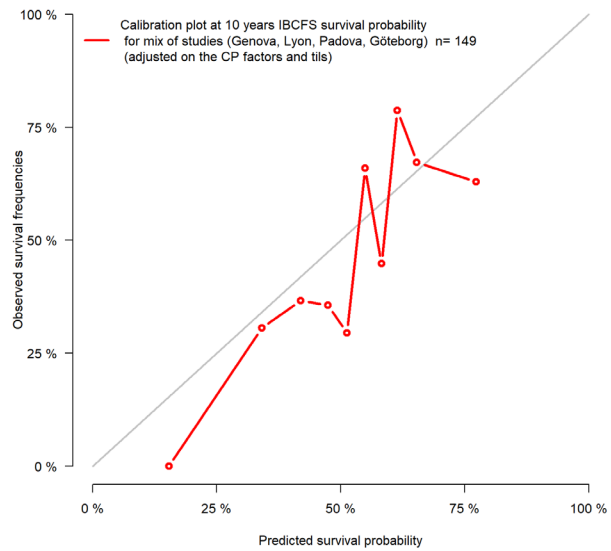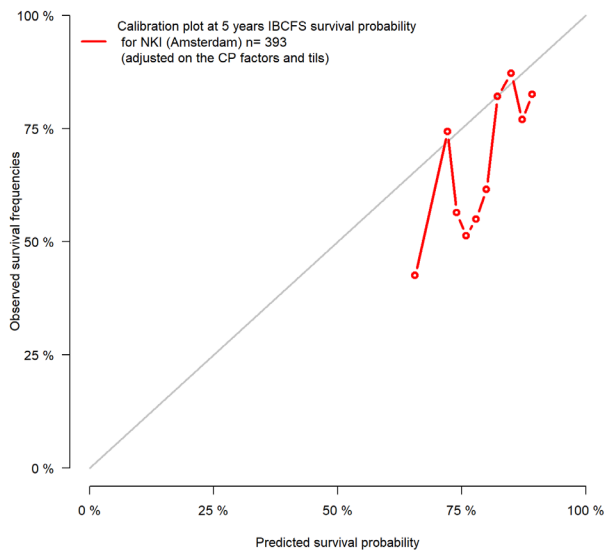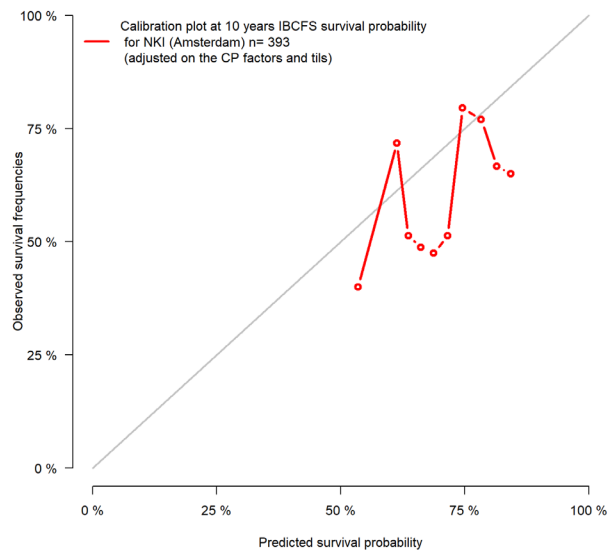

## 11. Investigation of the Violation of the Proportional Effects Assumption in the Cox Model

The Cox models presented in the sections above were associated with a significant test for the overall proportional hazards hypothesis<sup>16</sup>. This means that one or more covariates do not have a proportional effect on survival over time. To investigate further, we will first plot the Schoenfeld residuals to have a better idea of the effect of each covariate over time.

### eFigure 11-A. Schoenfeld Residuals of the Univariate Models for Each End Point

The first graphs represent the Schoenfeld residuals of the univariate models (only the TILs) with in red, the estimated coefficient from the Cox model and in green the null coefficient with the different endpoints.

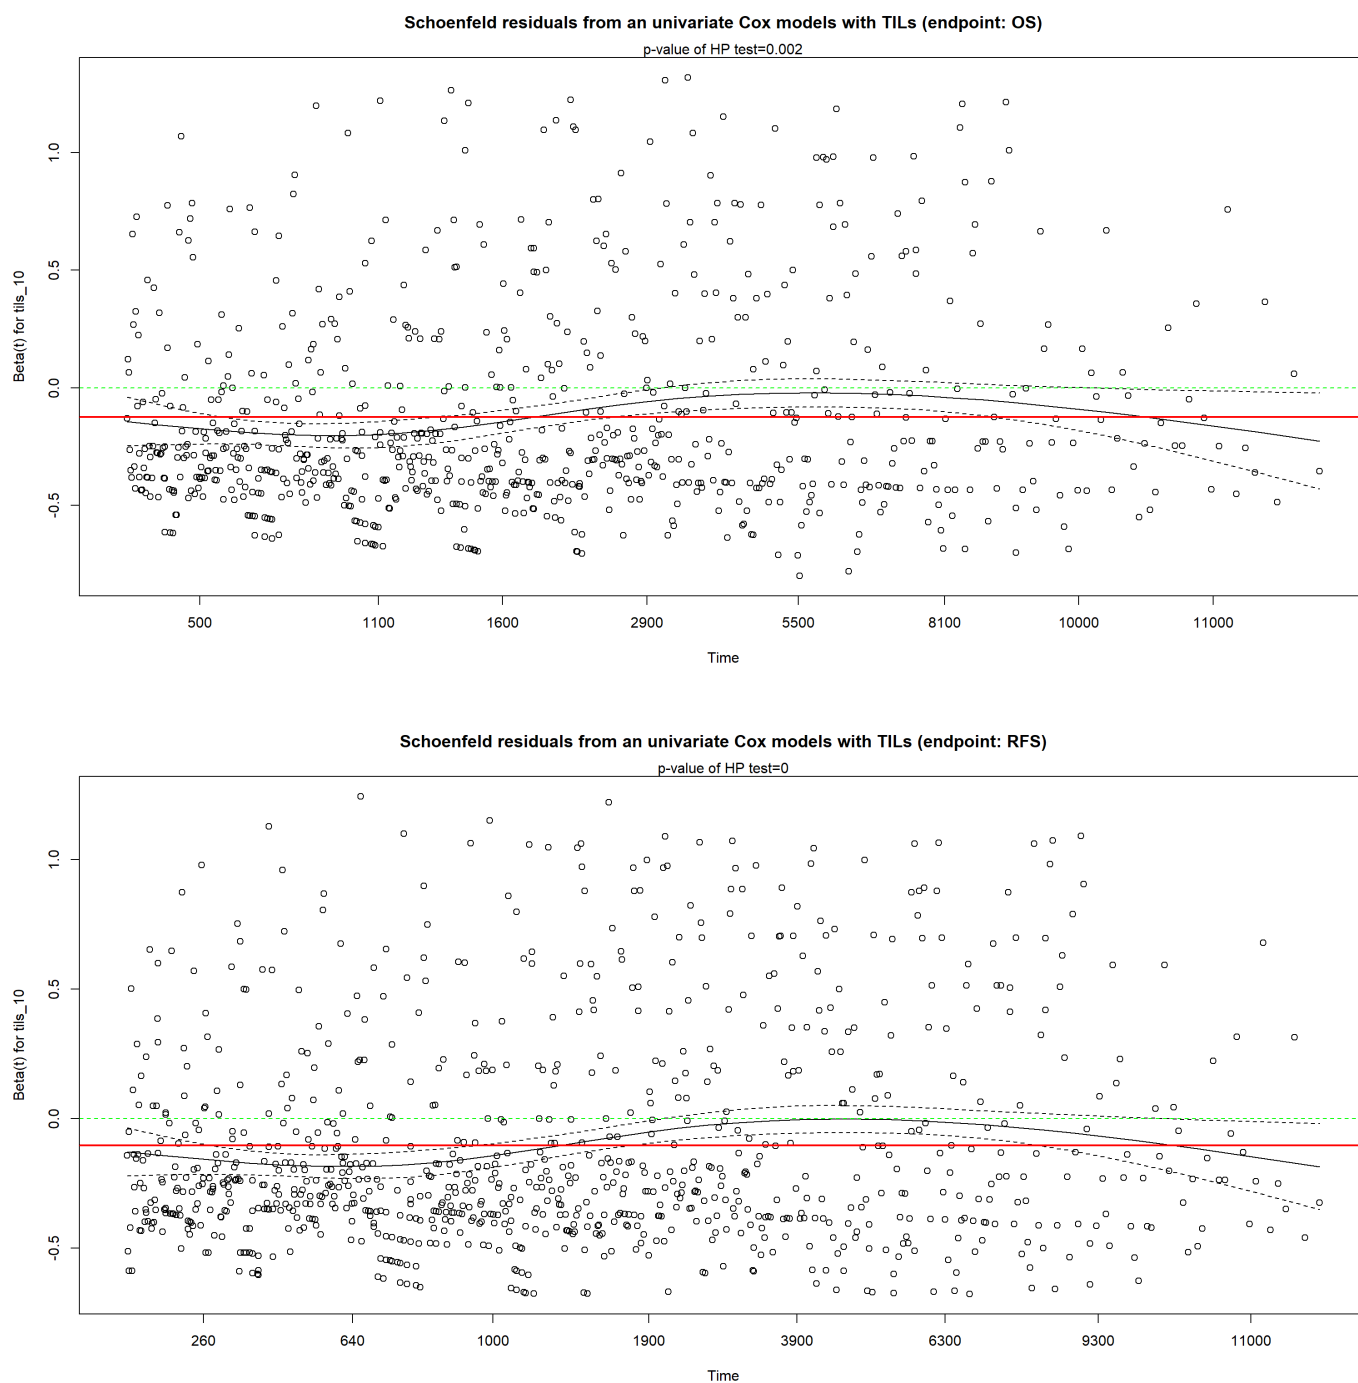

Schoenfeld residuals from an univariate Cox models with TILs (endpoint: DDFS)

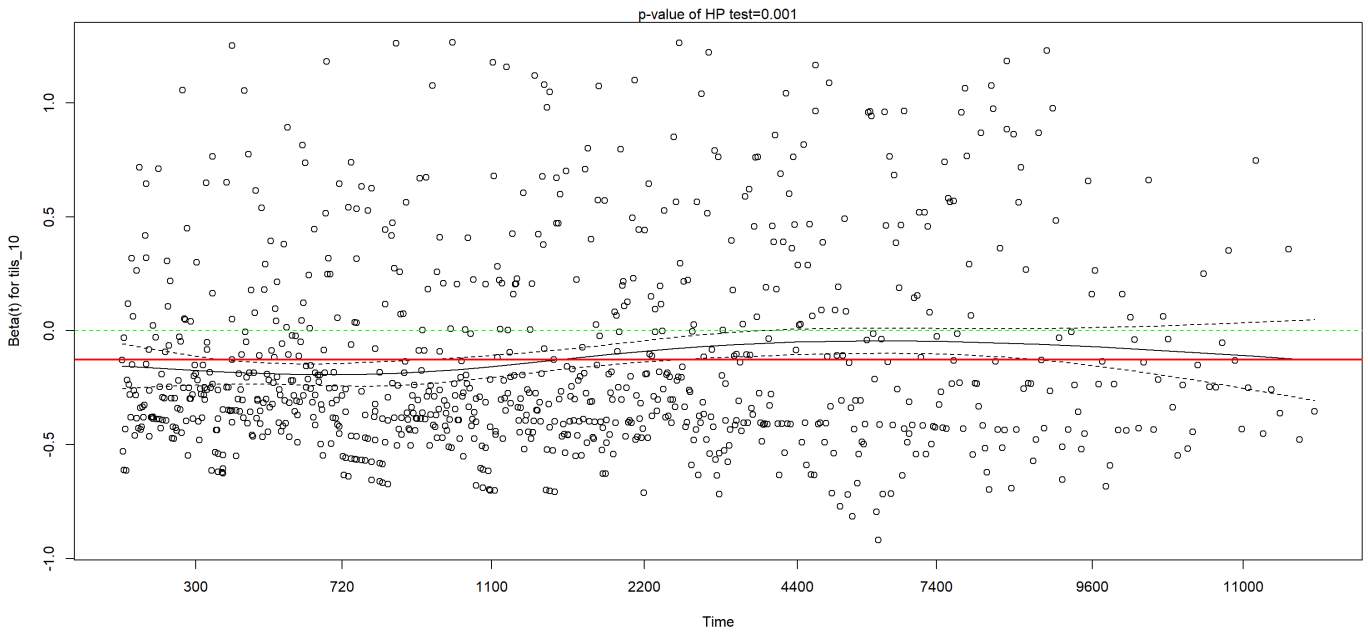

Schoenfeld residuals from an univariate Cox models with TILs (endpoint: DRFS)

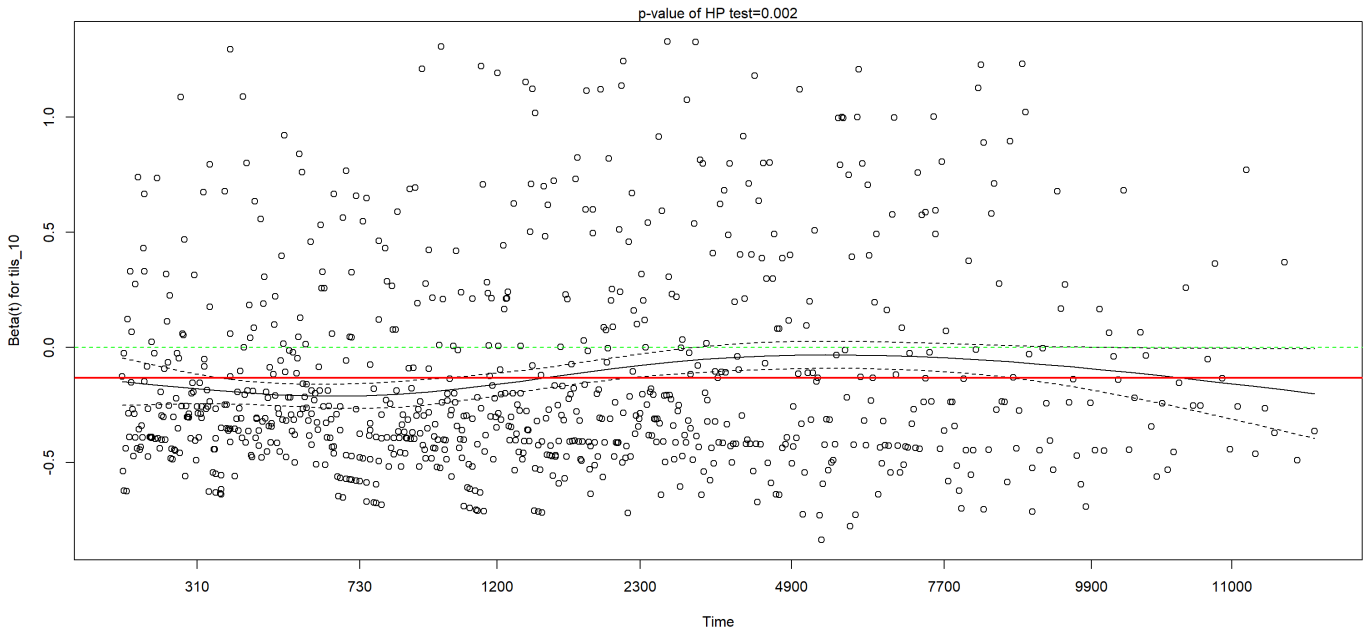

Schoenfeld residuals from an univariate Cox models with TILs (endpoint: IBCFS)

p-value of HP test=0

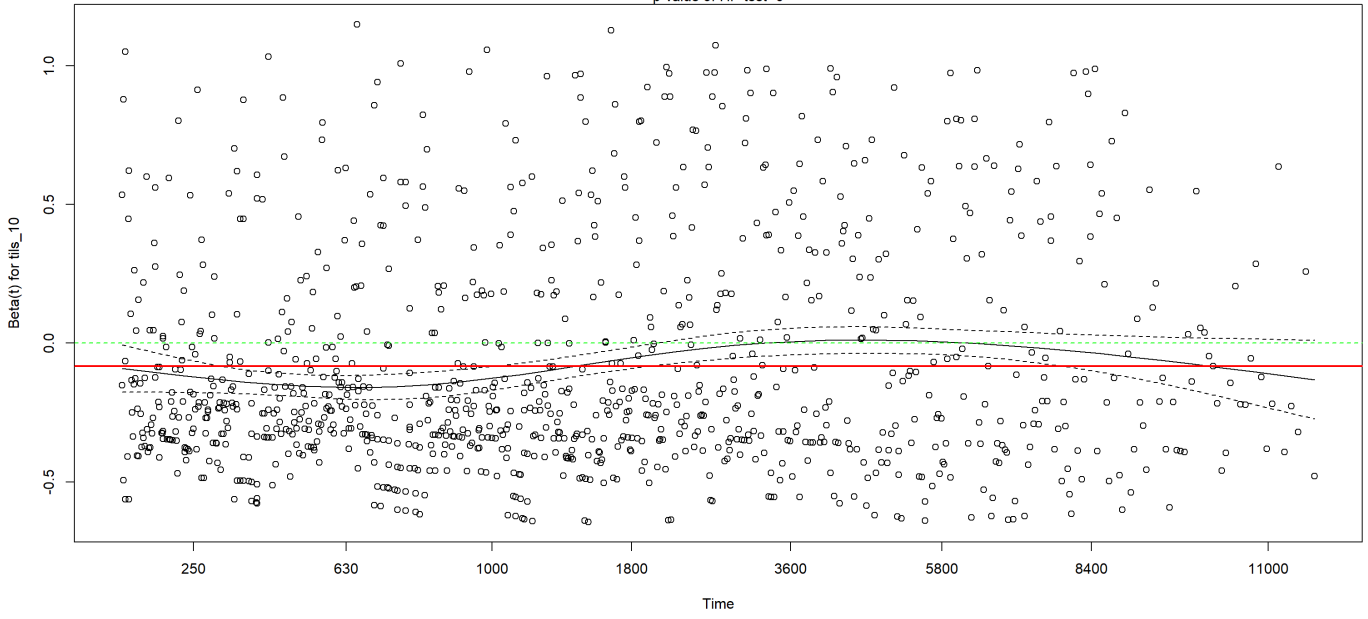

Schoenfeld residuals from an univariate Cox models with TILs (endpoint: IDFS)

p-value of HP test=0.001

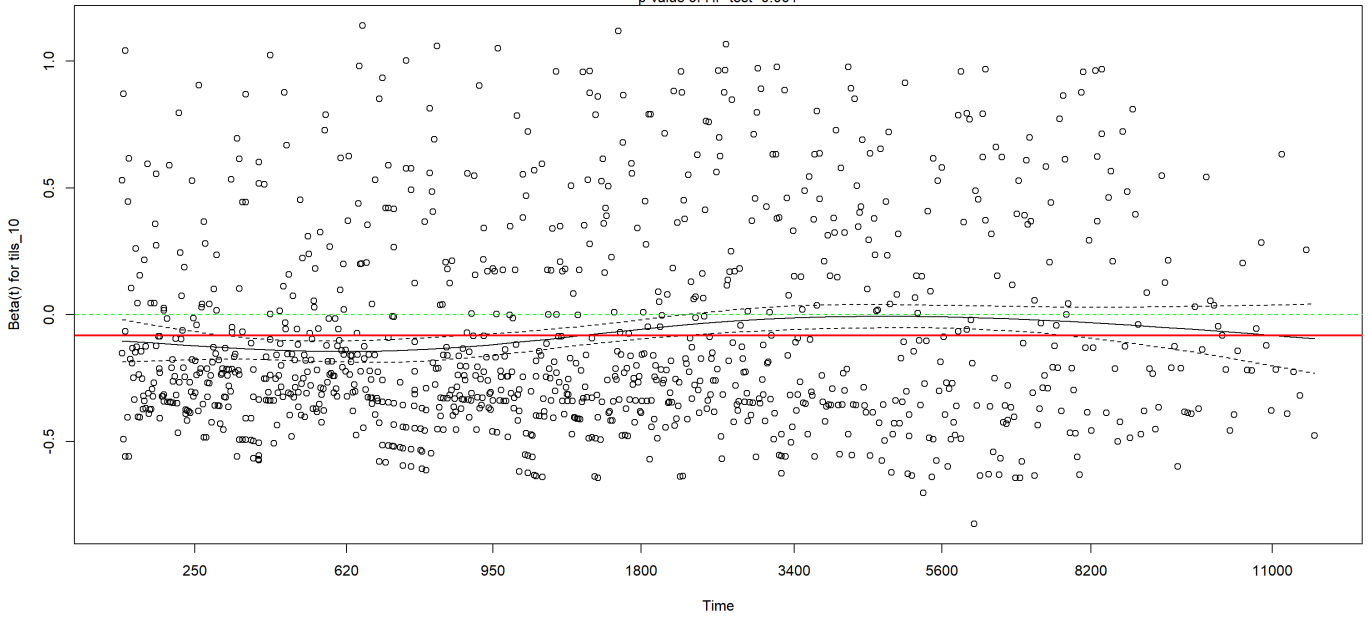

### eFigure 11-B. Schoenfeld Residuals of the Multivariable Models for Each End Point

These graphs represent the Schoenfeld residuals of the multivariate model with, in green the null coefficient. OS is the considered endpoint.

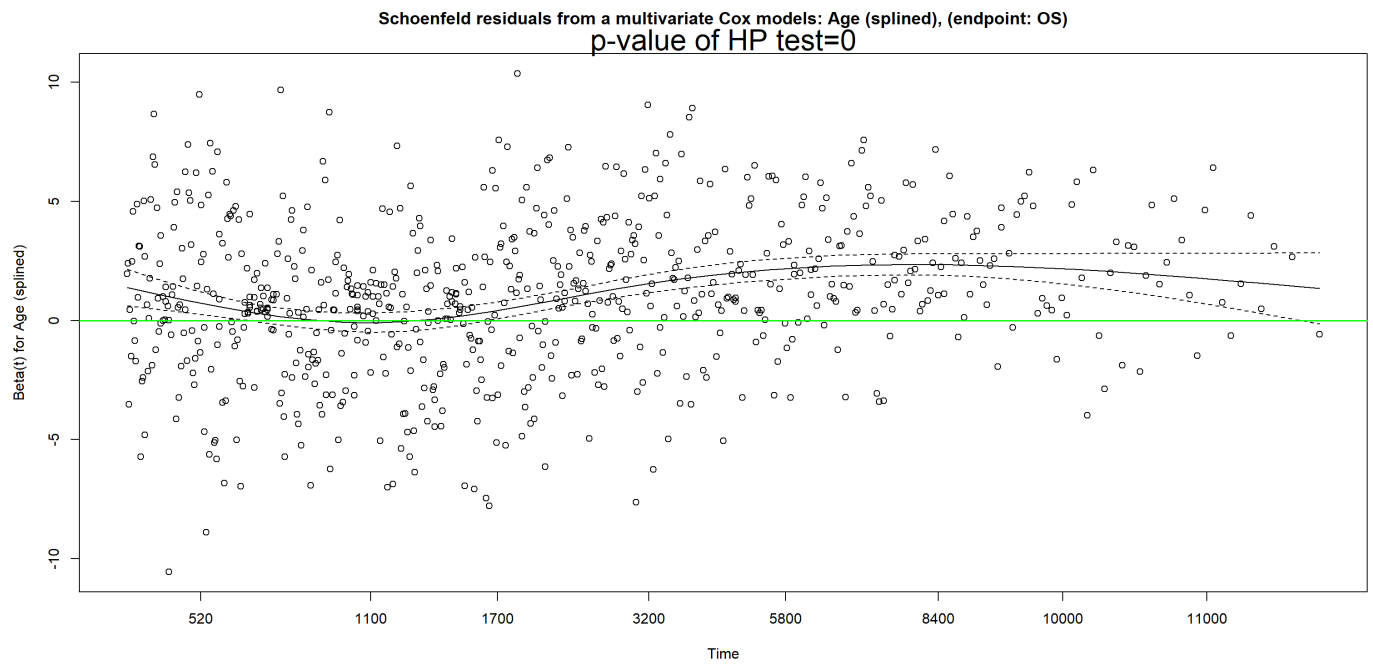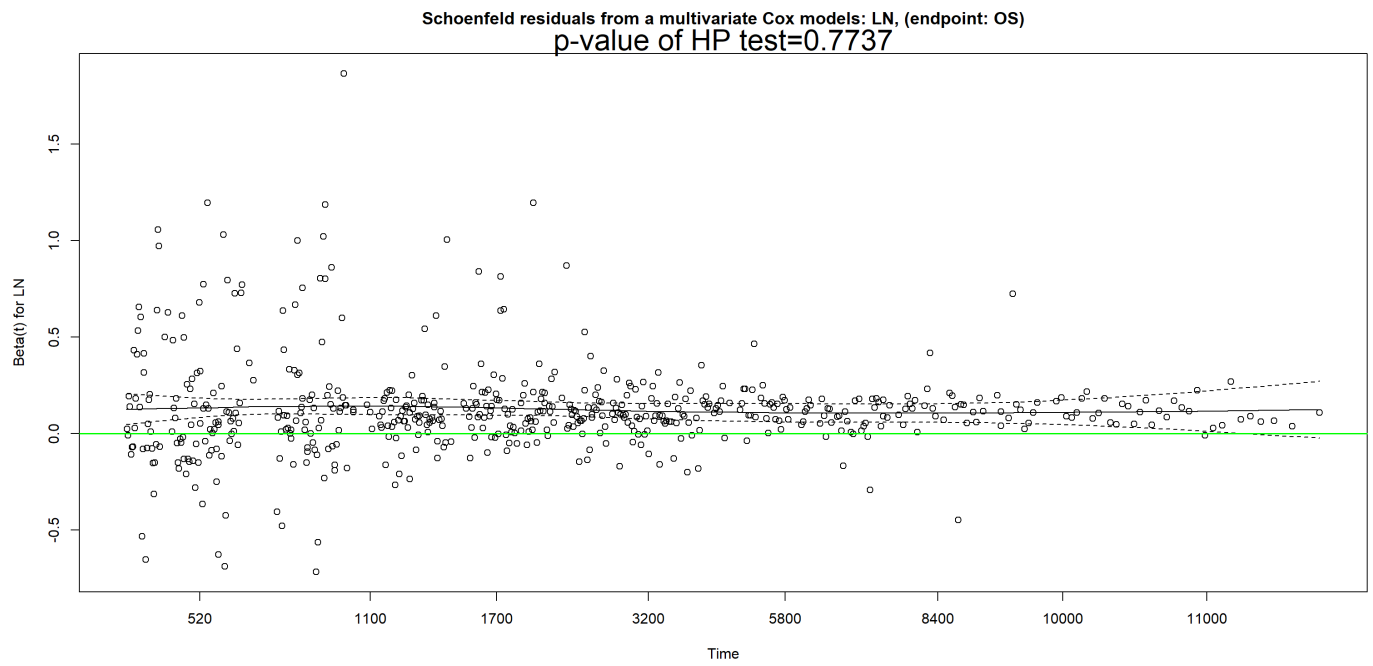

Schoenfeld residuals from a multivariate Cox models: Tumor size (splined), (endpoint: OS)  
p-value of HP test=0

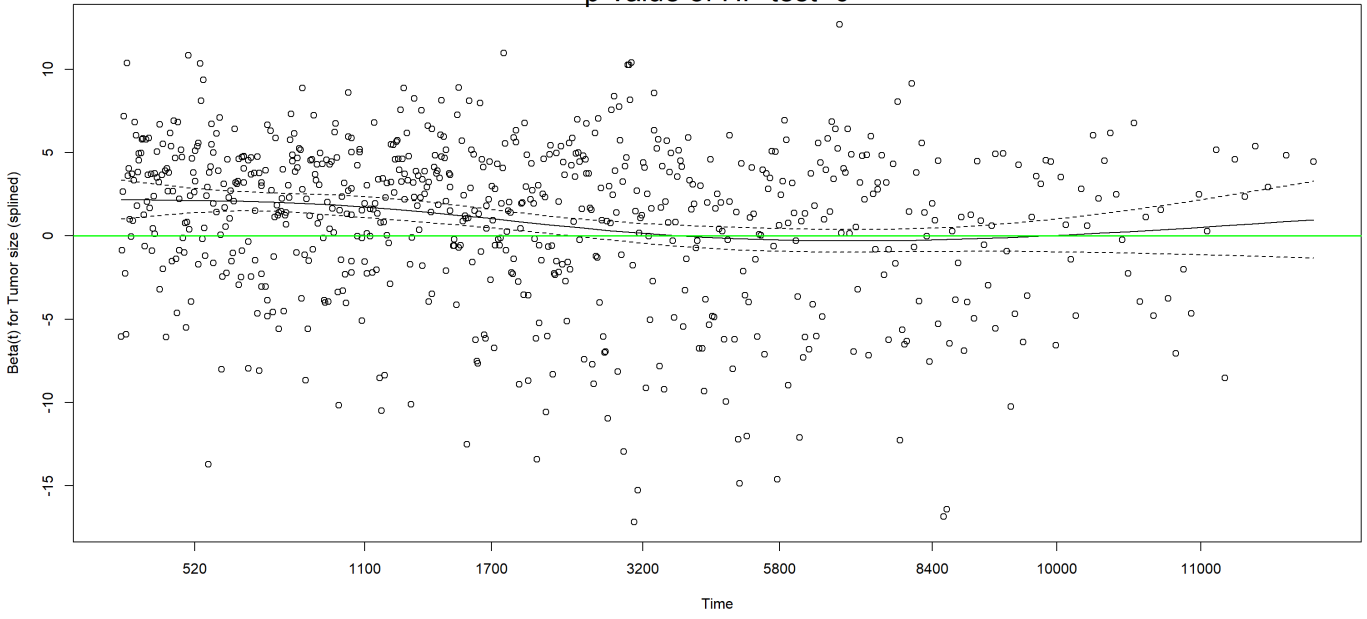

Schoenfeld residuals from a multivariate Cox models: Grade, (endpoint: OS)  
p-value of HP test=0.0045

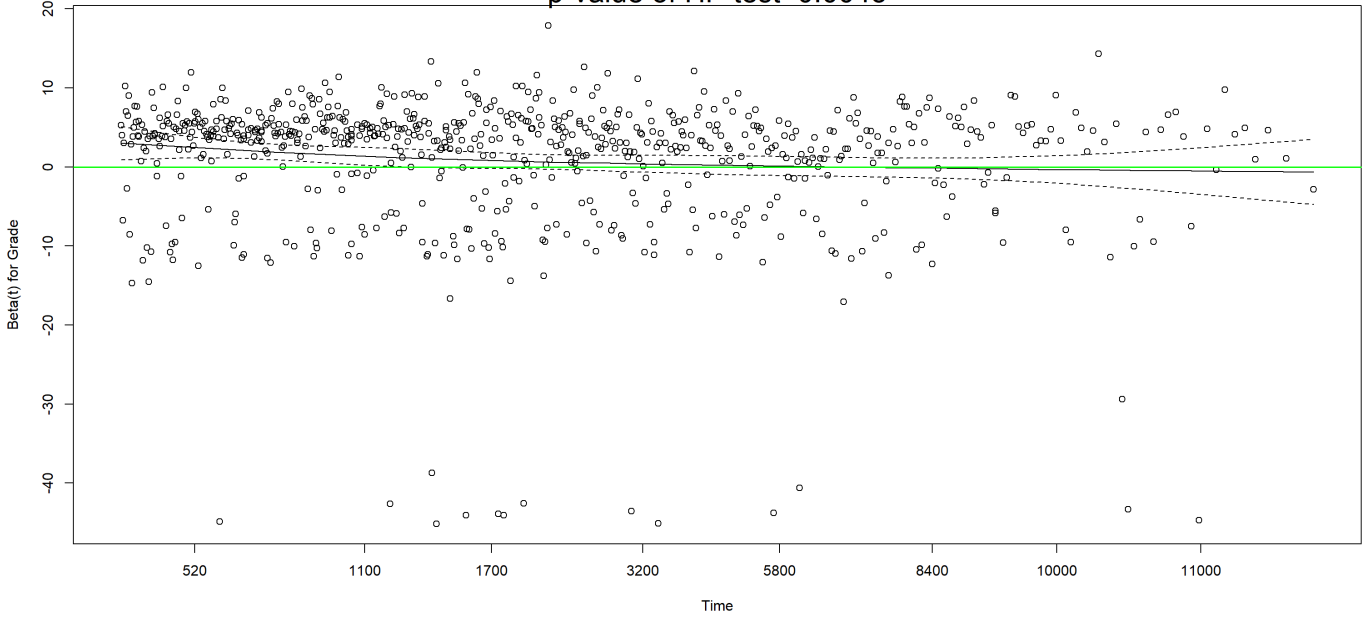

Schoenfeld residuals from a multivariate Cox models: Radiotherapy, (endpoint: OS)  
p-value of HP test=0.0125

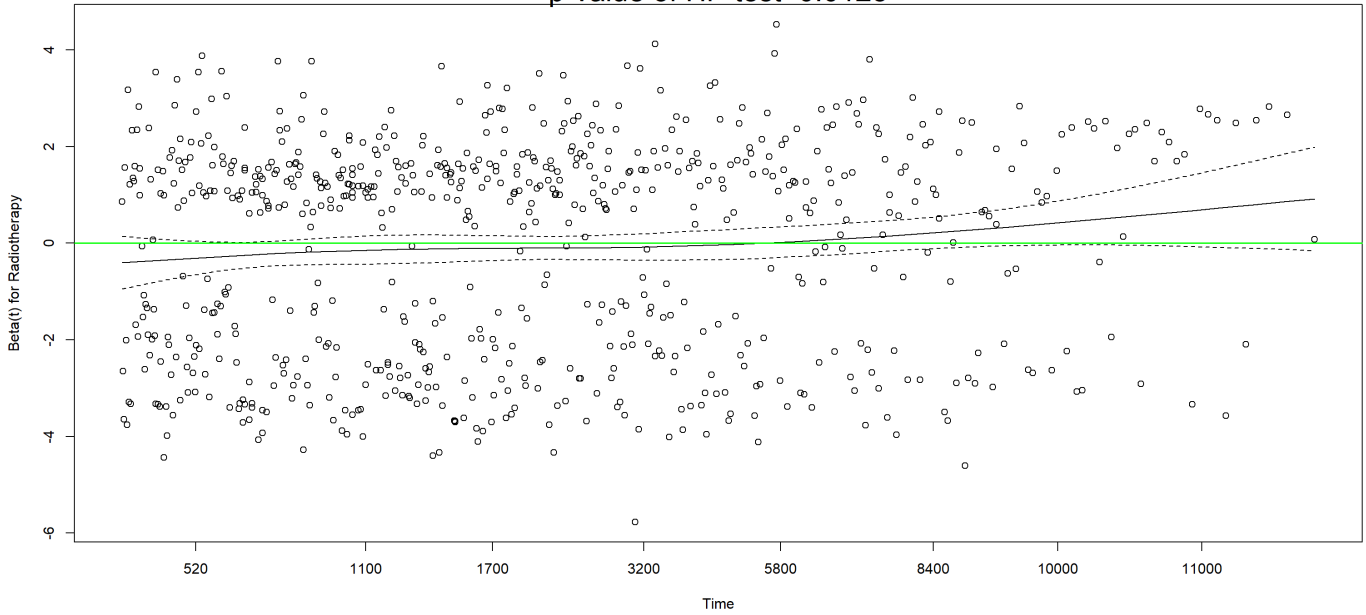

Schoenfeld residuals from a multivariate Cox models: Tils, (endpoint: OS)  
p-value of HP test=0.0043

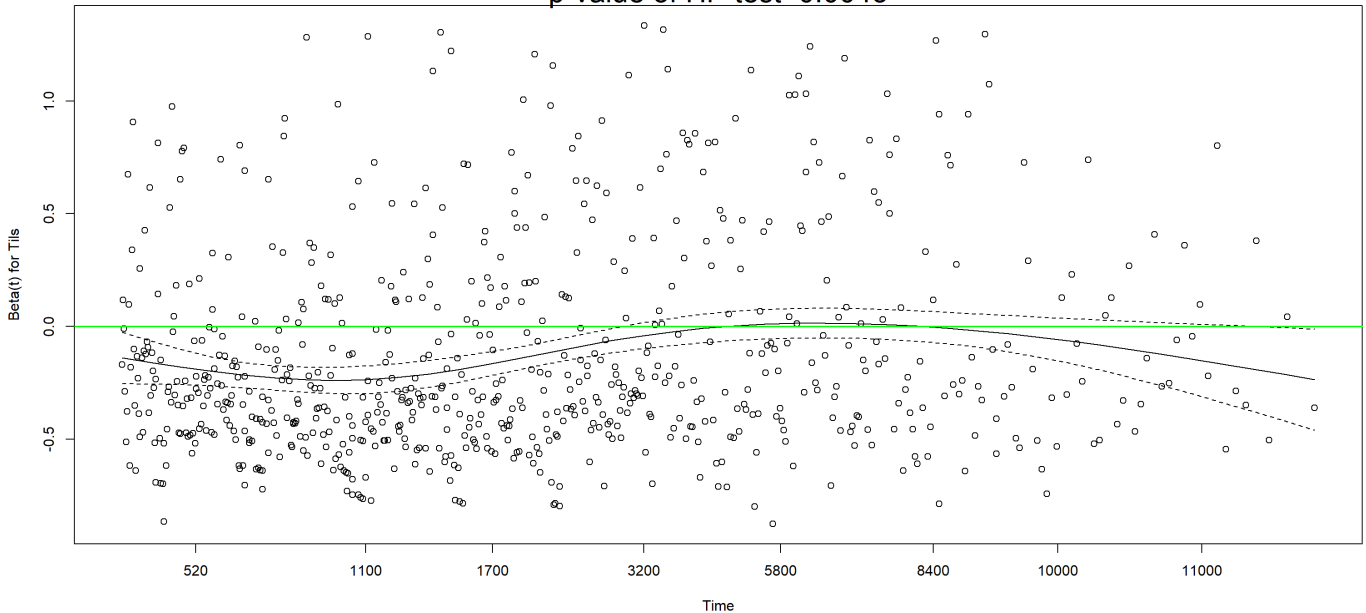

From the plot of the Schoenfeld residuals above, it appears that two variables are particularly affected by the non-proportionality: the size of the tumor and the TILs.

A way to deal with non-proportionality is to divide the time and then stratify the variable that has non-proportional hazard effect over time, on the divided time. From the graph obtained from a univariate model (section above), it appears that the TILs have a strong effect on the risk before 5 years but that the effect is weaker beyond.

Time is divided into several parts: before 5 years, 5-10 years and beyond 10 years. Then, the TILs are stratified on it. After the stratification on the sliced time, we again test the respect of the proportional hazards of the TILs in the multivariate Cox models.

**eTable 11. Multivariate Cox Model With End Point: Overall Survival (Just the Coefficients of the TILs are Shown) Stratified on Time**

| Variable | Beta (SE) | HR (95% CI) | P |
|----------|-----------|-------------|---|
|----------|-----------|-------------|---|

**eTable 11. Multivariate Cox Model With End Point: Overall Survival (Just the Coefficients of the TILs are Shown) Stratified on Time**

| <b>Variable</b>      | <b>Beta (SE)</b> | <b>HR (95% CI)</b> | <b>P</b> |
|----------------------|------------------|--------------------|----------|
| TILs before 5 years  | -0.13 (0.02)     | 0.88 (0.85, 0.91)  | <0.001   |
| TILs in [5;10] years | -0.05 (0.02)     | 0.95 (0.91, 1.00)  | 0.05     |
| TILs after 10 years  | -0.04 (0.03)     | 0.96 (0.91, 1.02)  | 0.23     |



## 12. Investigation of the Effect of Inclusion Year on Survival End Points According to TILs

eTable 12. Sensitivity Analysis of Survival Outcomes According to TIL Levels Pre- and Post- 1998

| Year of surgery | N (%)      | TILs | n (%)     | 5-year IDFS | 5-year RFS  | 5-year DRFS  | 5-year DDFS | 5-year OS    |
|-----------------|------------|------|-----------|-------------|-------------|--------------|-------------|--------------|
| 1998 or before  | 1181 (60%) | <30  | 745 (63%) | 57% [54-60] | 60% [57-63] | 64% [61-67]  | 62% [59-65] | 68% [65-71]  |
|                 |            | ≥30  | 436 (37%) | 74% [70-77] | 79% [76-82] | 82% [79-85]  | 81% [78-84] | 85% [82-88]  |
|                 |            | ≥50  | 284 (24%) | 77% [73-82] | 84% [81-88] | 88% [85-91]  | 86% [83-89] | 91% [88-94]  |
|                 |            | ≥75  | 133 (11%) | 86% [80-91] | 91% [87-95] | 94% [90-97]  | 92% [89-96] | 96% [93-98]  |
| 1999 or after   | 785 (40%)  | <30  | 555 (71%) | 65% [62-69] | 69% [65-72] | 74% [71-77]  | 71% [68-75] | 77% [74-80]  |
|                 |            | ≥30  | 230 (29%) | 75% [71-81] | 80% [75-85] | 87% [82-90]  | 83% [79-87] | 88% [84-92]  |
|                 |            | ≥50  | 133 (17%) | 78% [71-84] | 81% [74-87] | 88% [82-93]  | 85% [79-91] | 89% [84-94]  |
|                 |            | ≥75  | 36 (5%)   | 79% [66-91] | 85% [74-94] | 94% [87-100] | 88% [77-97] | 94% [86-100] |

eFigure 12-A. Survival Outcomes in Patients With TNBC and TILs <30% Who Underwent Locoregional Therapy Before vs After 1998

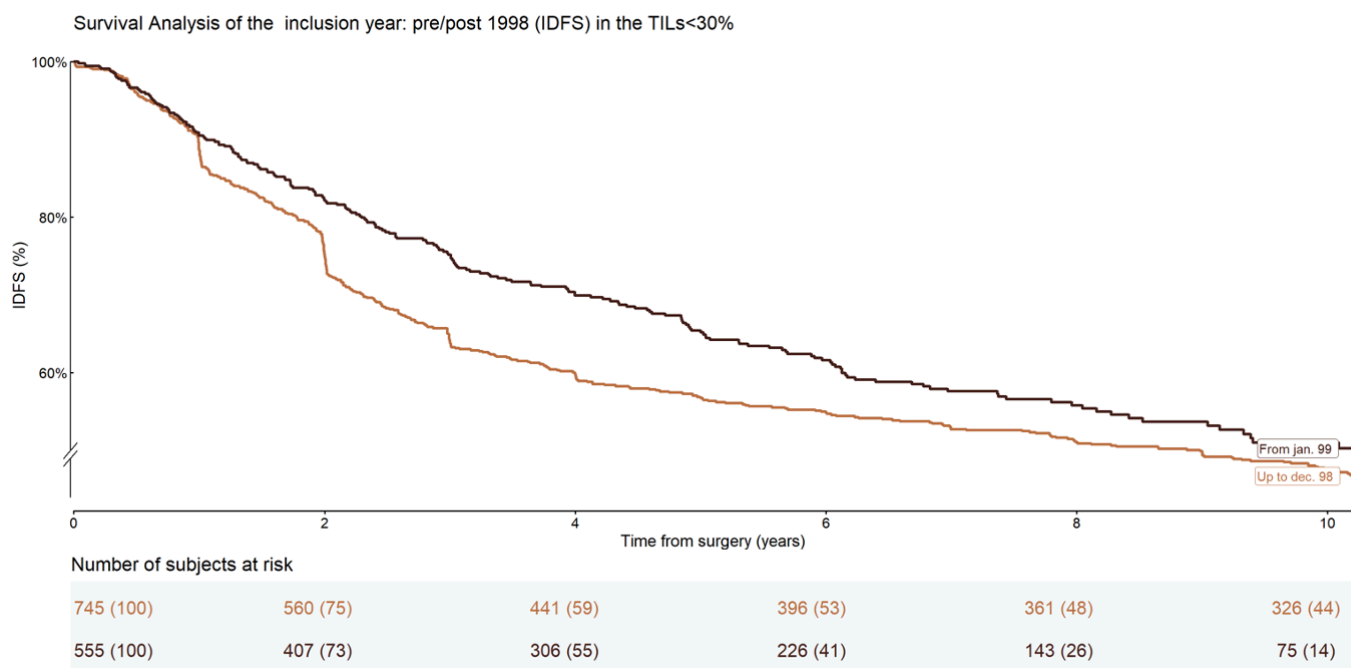

Survival Analysis of the inclusion year: pre/post 1998 (IBCFS) in the TILs<30%

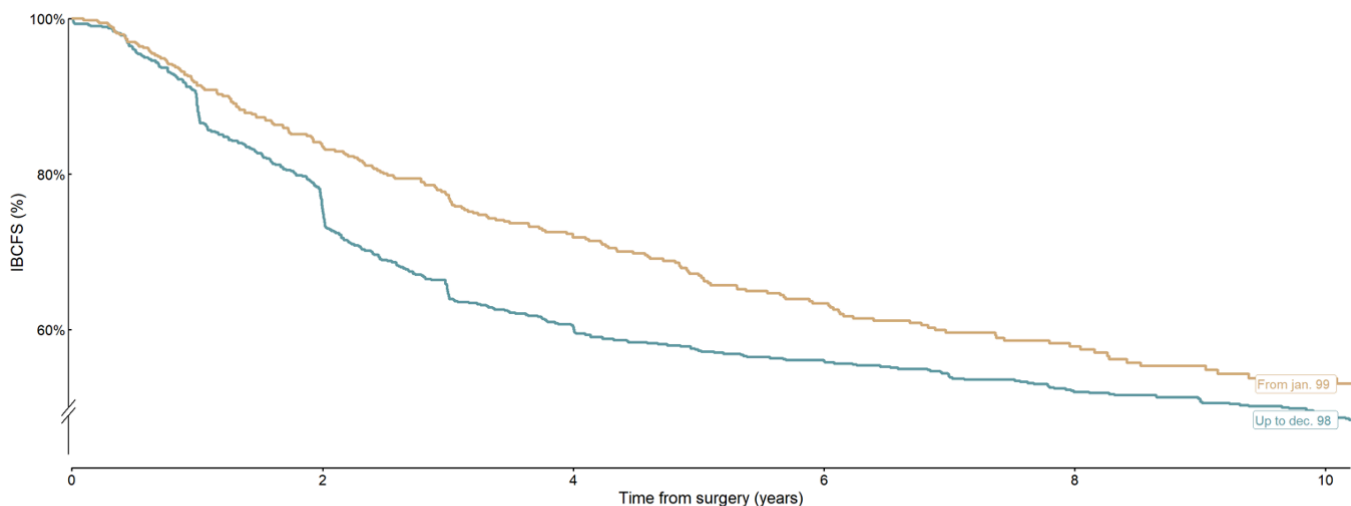

Number of subjects at risk

|           |          |          |          |          |          |
|-----------|----------|----------|----------|----------|----------|
| 745 (100) | 562 (75) | 445 (60) | 404 (54) | 368 (49) | 337 (45) |
| 555 (100) | 414 (75) | 316 (57) | 231 (42) | 148 (27) | 80 (14)  |

Survival Analysis of the inclusion year: pre/post 1998 (RFS) in the TILs<30%

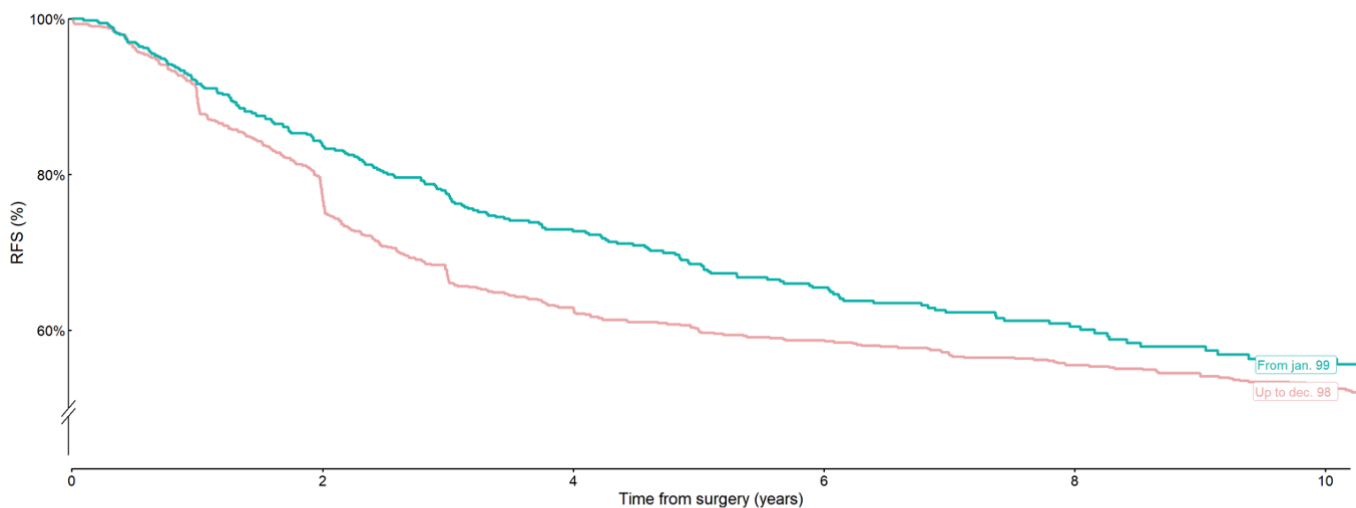

Number of subjects at risk

|           |          |          |          |          |          |
|-----------|----------|----------|----------|----------|----------|
| 745 (100) | 573 (77) | 463 (62) | 424 (57) | 393 (53) | 361 (48) |
| 555 (100) | 415 (75) | 320 (58) | 237 (43) | 154 (28) | 83 (15)  |

Survival Analysis of the inclusion year: pre/post 1998 (DRFS) in the TILs<30%

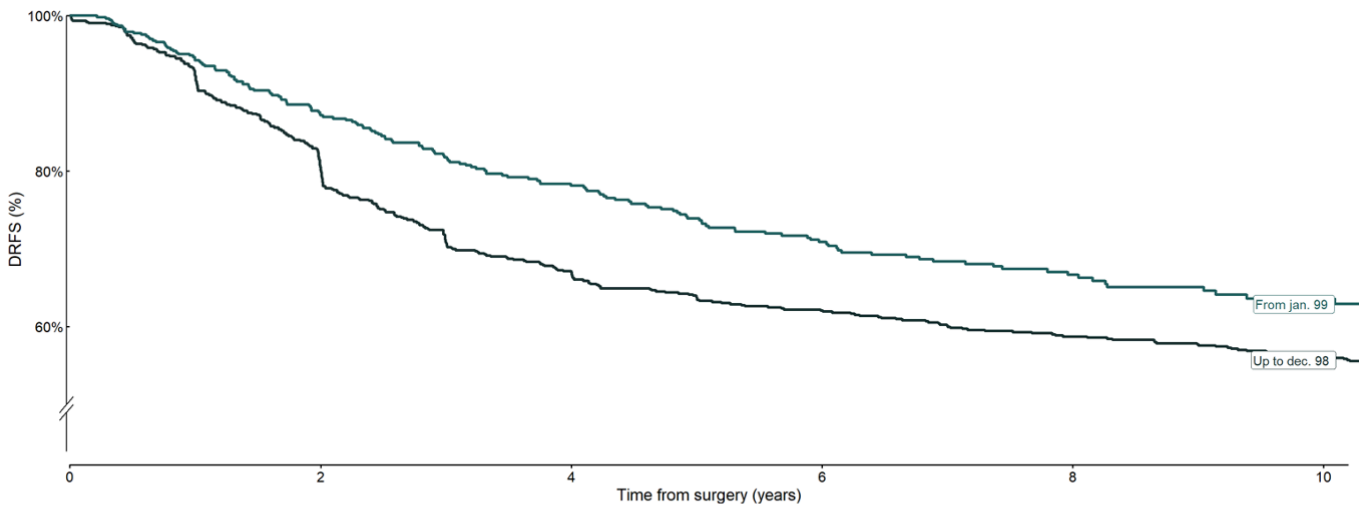

Number of subjects at risk

|           |          |          |          |          |          |
|-----------|----------|----------|----------|----------|----------|
| 745 (100) | 598 (80) | 494 (66) | 449 (60) | 416 (56) | 384 (52) |
| 555 (100) | 431 (78) | 346 (62) | 263 (47) | 177 (32) | 98 (18)  |

Survival Analysis of the inclusion year: pre/post 1998 (OS) in the TILs<30%

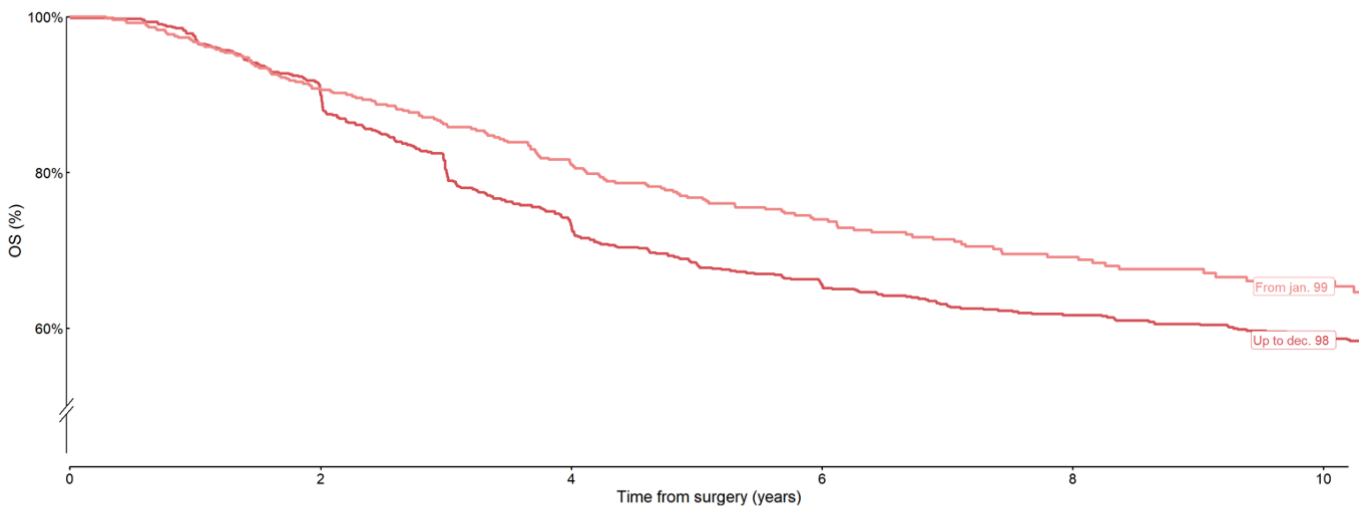

Number of subjects at risk

|           |          |          |          |          |          |
|-----------|----------|----------|----------|----------|----------|
| 745 (100) | 669 (90) | 539 (72) | 475 (64) | 437 (59) | 403 (54) |
| 555 (100) | 447 (81) | 357 (64) | 273 (49) | 185 (33) | 102 (18) |

**eFigure 12-B. Survival Outcomes in Patients With TNBC and TILs  $\geq 50\%$  Who Underwent Locoregional Therapy Before vs After 1998**

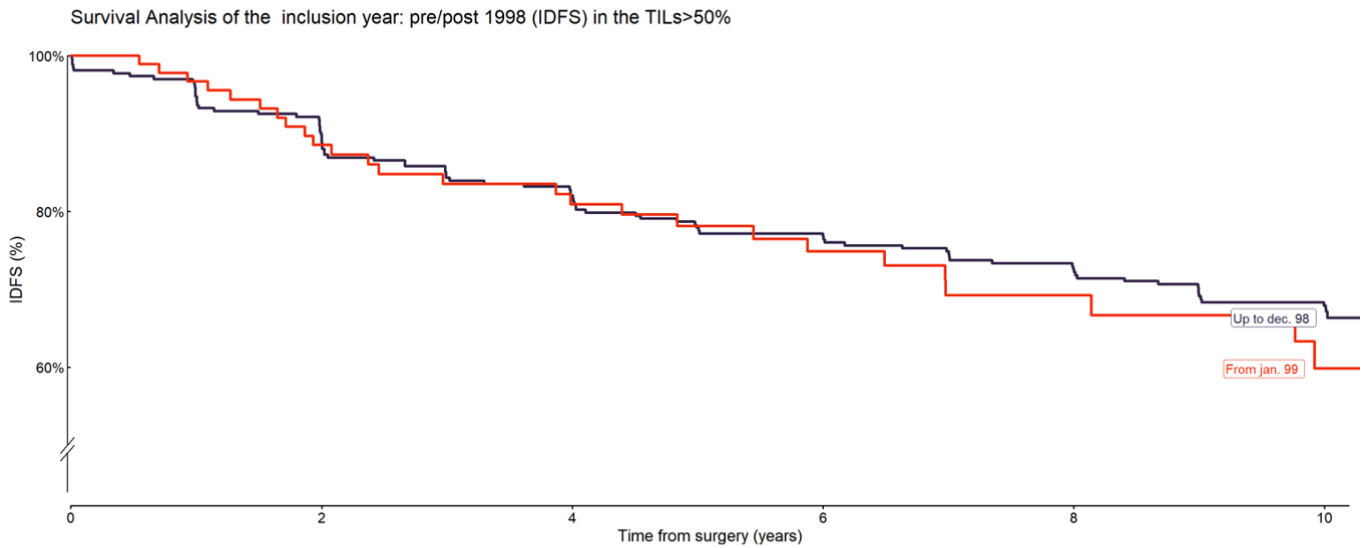

| Number of subjects at risk |          |          |          |          |          |  |
|----------------------------|----------|----------|----------|----------|----------|--|
| 268 (100)                  | 241 (90) | 220 (82) | 202 (75) | 189 (71) | 172 (64) |  |
| 100 (100)                  | 73 (73)  | 62 (62)  | 46 (46)  | 28 (28)  | 16 (16)  |  |

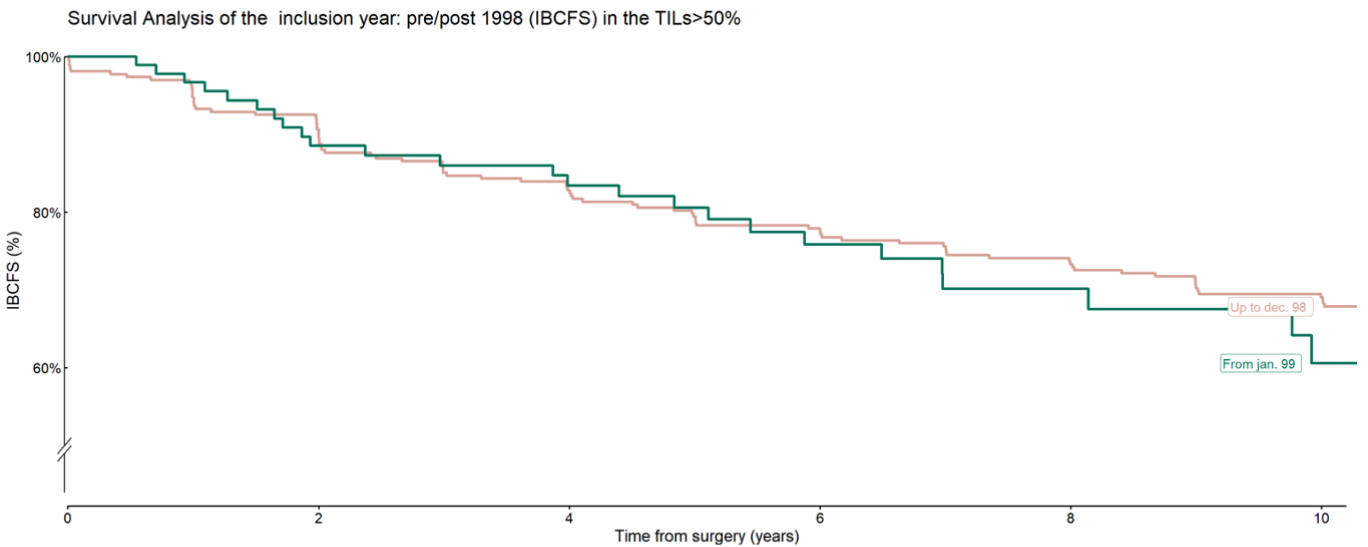

| Number of subjects at risk |          |          |          |          |          |  |
|----------------------------|----------|----------|----------|----------|----------|--|
| 268 (100)                  | 243 (91) | 222 (83) | 204 (76) | 191 (71) | 175 (65) |  |
| 100 (100)                  | 73 (73)  | 64 (64)  | 47 (47)  | 28 (28)  | 16 (16)  |  |

Survival Analysis of the inclusion year: pre/post 1998 (RFS) in the TILs>50%

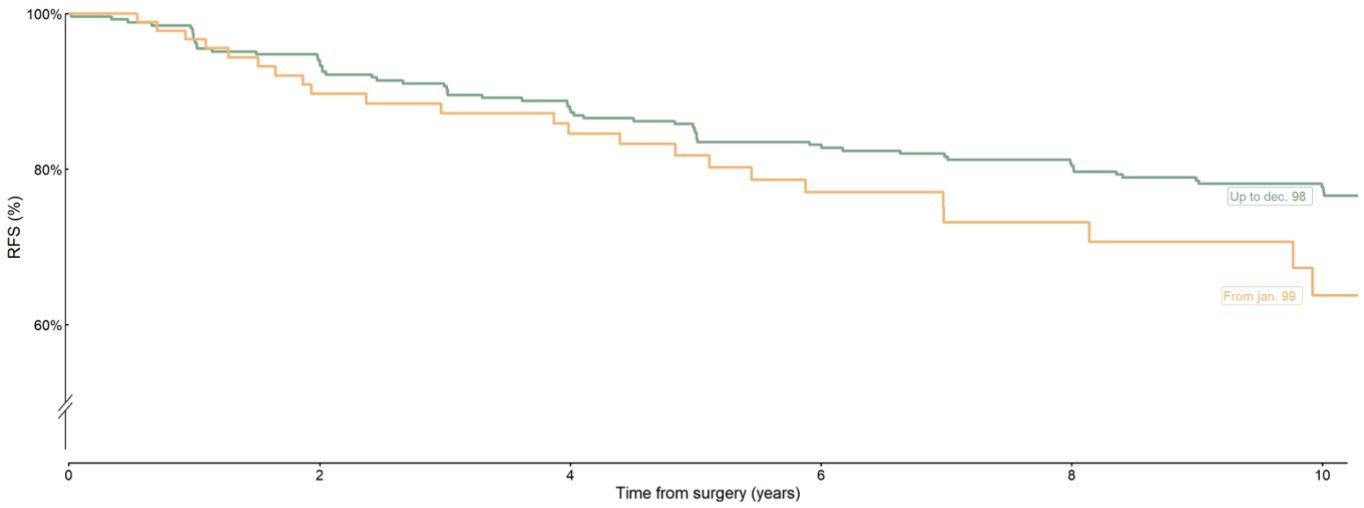

Number of subjects at risk

|           |          |          |          |          |          |
|-----------|----------|----------|----------|----------|----------|
| 268 (100) | 252 (94) | 235 (88) | 218 (81) | 210 (78) | 198 (74) |
| 100 (100) | 74 (74)  | 65 (65)  | 48 (48)  | 30 (30)  | 17 (17)  |

Survival Analysis of the inclusion year: pre/post 1998 (DRFS) in the TILs>50%

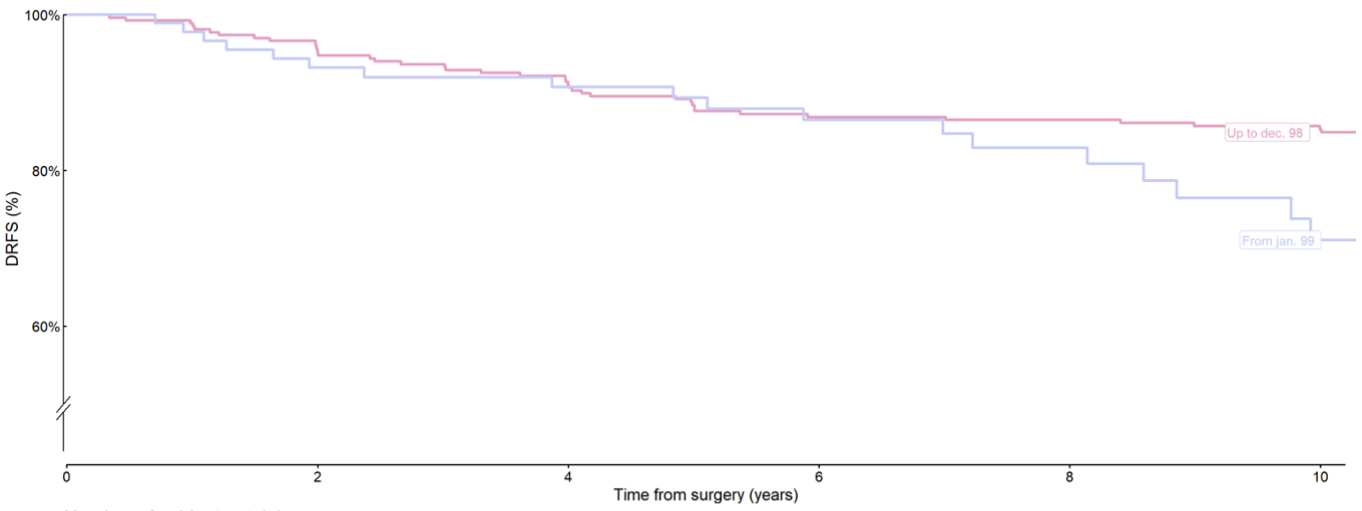

Number of subjects at risk

|           |          |          |          |          |          |
|-----------|----------|----------|----------|----------|----------|
| 268 (100) | 256 (96) | 244 (91) | 228 (85) | 226 (84) | 217 (81) |
| 100 (100) | 78 (78)  | 72 (72)  | 59 (59)  | 40 (40)  | 25 (25)  |

Survival Analysis of the inclusion year: pre/post 1998 (OS) in the TILs>50%

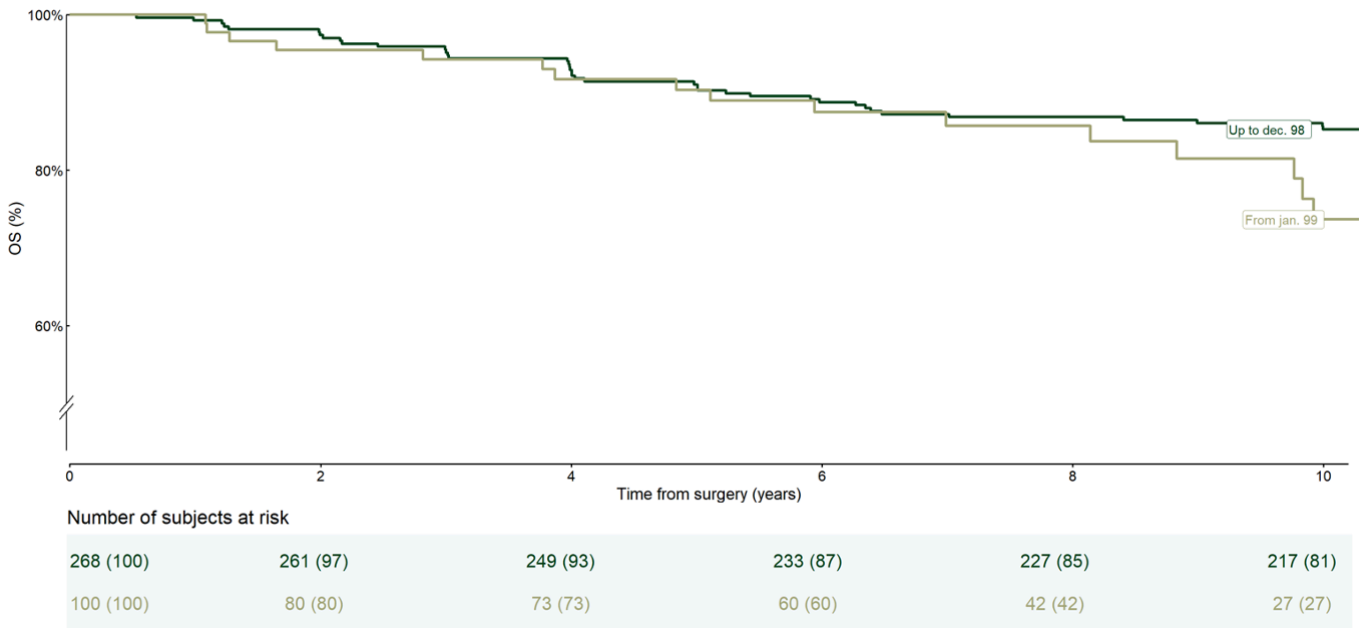

## eReferences.

1. Tolaney, S. M., Garrett-Mayer, E., White, J., Blinder, V. S., Foster, J. C., Amiri-Kordestani, L., Hwang, E. S., Bliss, J. M., Rakovitch, E., Perlmutter, J., Spears, P. A., Frank, E., Tung, N. M., Elias, A. D., Cameron, D., Denduluri, N., Best, A. F., DiLeo, A., Baizer, L., ... Korde, L. A. (2021). Updated Standardized Definitions for Efficacy End Points (STEEP) in Adjuvant Breast Cancer Clinical Trials: STEEP Version 2.0. In *Journal of Clinical Oncology* (Vol. 39, Issue 24, pp. 2720–2731). American Society of Clinical Oncology (ASCO). <https://doi.org/10.1200/jco.20.03613>↔
2. Hsieh, F. Y., & Lavori, P. W. (2000). Sample-Size Calculations for the Cox Proportional Hazards Regression Model with Non-binary Covariates. In *Controlled Clinical Trials* (Vol. 21, Issue 6, pp. 552–560). Elsevier BV. [https://doi.org/10.1016/s0197-2456\(00\)00104-5](https://doi.org/10.1016/s0197-2456(00)00104-5)↔
3. Jolani, S., Debray, T. P. A., Koffijberg, H., van Buuren, S., & Moons, K. G. M. (2015). Imputation of systematically missing predictors in an individual participant data meta-analysis: a generalized approach using MICE. In *Statistics in Medicine* (Vol. 34, Issue 11, pp. 1841–1863). Wiley. <https://doi.org/10.1002/sim.6451>↔
4. van Buuren, S. (2018). *Flexible Imputation of Missing Data, Second Edition*. Chapman and Hall/CRC. <https://doi.org/10.1201/9780429492259>↔
5. IR White, P Royston, and AM Wood. Multiple imputation using chained equations: Issues and guidance for practice. *Statistics in Medicine*, 30(4):377–399, 2011. ISSN 1097-0258. [doi:10.1002/sim.4067](https://doi.org/10.1002/sim.4067).↔
6. White, I. R., & Royston, P. (2009). Imputing missing covariate values for the Cox model. In *Statistics in Medicine* (Vol. 28, Issue 15, pp. 1982–1998). Wiley. <https://doi.org/10.1002/sim.3618>↔
7. Kasim, R. M., and S. W. Raudenbush. 1998. “Application of Gibbs Sampling to Nested Variance Components Models with Heterogeneous Within-Group Variance.” *Journal of Educational and Behavioral Statistics* 23 (2): 93–116.↔
8. Jolani, S., T. P. A. Debray, H. Koffijberg, S. Van Buuren, and K. G. M. Moons. 2015. “Imputation of Systematically Missing Predictors in an Individual Participant Data Meta-Analysis: A Generalized Approach Using MICE.” *Statistics in Medicine* 34 (11): 1841–63.↔
9. Snijders, T. A. B., & Bosker, R. J. (2012). *Multilevel analysis: An introduction to basic and advanced multilevel modeling*. Thousand Oaks, CA: Sage↔
10. Marshall, A., Altman, D.G., Holder, R.L. et al. Combining estimates of interest in prognostic modelling studies after multiple imputation: current practice and guidelines. *BMC Med Res Methodol* 9, 57 (2009). <https://doi.org/10.1186/1471-2288-9-57>↔
11. van Buuren, S. (2018). *Flexible Imputation of Missing Data, Second Edition*. Chapman and Hall/CRC. <https://doi.org/10.1201/9780429492259>↔
12. P. Grambsch and T. Therneau (1994), Proportional hazards tests and diagnostics based on weighted residuals. *Biometrika*, 81, 515-26.↔
13. *Competing Risks: A Practical Perspective*, Melania Pintilie, ISBN: 978-0-470-87068-6↔
14. Uno, H., Cai, T., Tian, L. and Wei, L. (2007). *Evaluating prediction rules for t-years survivors with censored regression models*. *Journal of the American Statistical Association*, 102(478):527-537.↔
15. P. Grambsch and T. Therneau (1994), Proportional hazards tests and diagnostics based on weighted residuals. *Biometrika*, 81, 515-26↔
