# Supplementary material
Source: PubMed Central journal article supplement (PMC10988354)
Supplement: jama-e243056-s003.pdf [file jama-e243056-s003.pdf]

## Data Sharing Statement

### Data

**Data available:** Yes

**Data types:** Deidentified participant data, Data dictionary

**How to access data:** [leonferre.roberto@mayo.edu](mailto:leonferre.roberto@mayo.edu)

**When available:** With publication

### Supporting Documents

**Document types:** None

### Additional Information

**Who can access the data:** researchers whose proposed use of the data has been approved

**Types of analyses:** for any purpose

**Mechanisms of data availability:** after approval of a proposal
